# Supplementary material
Source: ML conference proceedings conference paper supplement (https://openreview.net/forum?id=bsycpMi00R1)
Supplement: supplementary_material [file attachment]

## Sheet: Player Data
Player ID	Team	Strategy Space	Initial Strategy
1	1	[.05,.8]	0.1
2	1	[.6,.95]	0.9
3	1	[.05,.8]	0.2
4	2	[.05,.4]	0.1
5	2	[.6,.95]	0.9
6	2	[.2,.95]	0.8

## Sheet: Simulation Information
Simulation Name	Team ID 1	Team ID 2	Strategy Space	Simulation Time	Discretized Steps
Simulation	1	2	[0.257, 0.8644999999999999],[0.13550000000000006, 0.7429999999999999]	100	500

## Sheet: Simulation
Step	T1	T2	KL	Lyapunov	T1P1	T1P2	T1P3	T2P4	T2P5	T2P6
0	0.692	0.30799999999999994	2.4895895976923823	-11.858534999845203	0.1	0.9	0.2	0.1	0.9	0.8
1	0.686466571545629	0.30255774508478117	2.4895974120330235	-11.858547550329273	0.10224325285598411	0.8977567471440159	0.2053503810318442	0.09781197889511366	0.9021880211048864	0.8051559542472221
2	0.6808521375024167	0.2972203294241801	2.4895952896813913	-11.858544163673415	0.10453858652384364	0.8954614134761564	0.21089511756227317	0.09568402519664396	0.904315974803356	0.8101148905798028
3	0.6751698130782796	0.29199827507228315	2.48958645978393	-11.85853009846004	0.10688115504283553	0.8931188449571645	0.21663151453462284	0.09361921095024316	0.9063807890497568	0.8148767590680507
4	0.6694337621048216	0.2869003606043917	2.4895832413964305	-11.858524992550157	0.10926530147497074	0.8907346985250293	0.22255557449855992	0.09161967981235557	0.9083803201876444	0.8194428065906642
5	0.6636575475868031	0.28193532216940254	2.489587082075981	-11.858531042877308	0.11168536888226019	0.8883146311177399	0.2286633000037512	0.08968757543942545	0.9103124245605746	0.8238142800263418
6	0.6578547295786445	0.2771078746477873	2.489618399835657	-11.858564976778801	0.1141359654430746	0.8858640345569246	0.2349492695773492	0.08782263953222617	0.9121773604677754	0.8279944284706623
7	0.6520384835883557	0.27242393026585754	2.489682053495577	-11.85862848808691	0.11661114496611043	0.8833888550338869	0.24140830662340512	0.08602564471350443	0.9139743552865015	0.8319859655205586
8	0.6462209727569573	0.26790080000315986	2.48969570028557	-11.858640831378292	0.11910297066332198	0.8808970293366744	0.2480383136646581	0.08430443706428514	0.9156955629357232	0.8357862236520474
9	0.6404160653839828	0.26354062229109776	2.489680701261694	-11.858628252051975	0.12160430850092756	0.8783956914990687	0.2548316283633196	0.08265781076127494	0.9173421892387341	0.8394001041292538
10	0.6346366348397998	0.25934509247440485	2.4896527527700014	-11.858608035488782	0.12410802444514545	0.8758919755548513	0.261780588381601	0.08108455998118046	0.9189154400188282	0.842832508216303
11	0.6288945453517691	0.2553154747184224	2.489622653377901	-11.858590115162272	0.12660698446219393	0.8733930155378037	0.2688775313817138	0.07958347890070831	0.9204165210992993	0.8460883371773198
12	0.6232006435055212	0.2514526144311834	2.4895970577837883	-11.858578650139307	0.12909405451829134	0.8709059454817073	0.27611479502586933	0.07815336169656514	0.9218466383034413	0.8491724922764294
13	0.6175647551085983	0.24775695113888596	2.4895792112247497	-11.858573554235264	0.13156210057965595	0.8684378994203437	0.283484716976279	0.07679300254545757	0.923206997454548	0.8520898747777569
14	0.6119956870480028	0.24422853175582526	2.4895696592526804	-11.858571961942474	0.13400398861250606	0.8659960113874942	0.2909796348951544	0.07550119562409223	0.9244988043759133	0.8548453859454274
15	0.6065012337601061	0.24086702419228878	2.489566928843179	-11.858569618708849	0.13641258458306	0.8635874154169404	0.2985918864447068	0.07427673510917576	0.9257232648908308	0.8574439270435658
16	0.6010881879209101	0.23767173124631313	2.4895681776886454	-11.858562185304766	0.138780754457536	0.8612192455424639	0.30631380928714763	0.07311841517741477	0.9268815848225946	0.8598903993362971
17	0.595762354956805	0.2346416047275396	2.4895698092546246	-11.85854644796942	0.1411013642021524	0.858898635797846	0.3141377410846884	0.0720250300055159	0.9279749699944986	0.8621897040877465
18	0.5905285709707495	0.23177525976370295	2.4895680517891874	-11.858521427849393	0.1433672797831275	0.8566327202168682	0.32205601949954044	0.07099537377018578	0.9290046262298365	0.8643467425620391
19	0.5853907236761923	0.22907098924253178	2.4895595000065702	-11.858489384992659	0.1455713671666796	0.854428632833312	0.3300609821939152	0.07002824064813104	0.929971759351902	0.8663664160233
20	0.580343198744868	0.22653647980340885	2.4894145683458744	-11.858196291162514	0.14771662489839057	0.8522833751015945	0.338152934240574	0.06912527971230205	0.9308747202877418	0.8682454417464971
21	0.5753903693772068	0.22416623484589693	2.4891650262761322	-11.857692962521446	0.14979553221981046	0.8502044677801679	0.34632171152238717	0.06828360859630013	0.931716391403748	0.869990318246565
22	0.5705484162787731	0.22193750383006028	2.4890603381933536	-11.857481947054556	0.15178328744689043	0.8482167125530837	0.35454520074155776	0.06749546944132759	0.9325045305587231	0.8716217323617089
23	0.5658130767860825	0.2198495437118393	2.4890637648732623	-11.857489176581335	0.15367746419789993	0.8463225358020724	0.36282003179496014	0.0667599122838434	0.9332400877162085	0.8731419464422635
24	0.5611798550949945	0.2179014213959436	2.4891425517345214	-11.857648499832138	0.15547563609110843	0.844524363908864	0.37114283457946884	0.06607598716030653	0.9339240128397454	0.8745532228385634
25	0.5566440306508839	0.2160920211348205	2.4892679698956037	-11.85790183512428	0.15717537674478532	0.8428246232551885	0.37951023899195807	0.06544274410717595	0.934557255892875	0.8758578239009434
26	0.55220066578649	0.2144200519659698	2.489415353648183	-11.858199301713611	0.15877425977720008	0.8412257402227763	0.3879188749293023	0.0648592331609106	0.9351407668391387	0.8770580119797381
27	0.547844612571983	0.2128840551714667	2.489564132192424	-11.858499325498622	0.16026985880662217	0.8397301411933574	0.39636537228837604	0.06432450435796946	0.9356754956420779	0.8781560494252824
28	0.5435705188448113	0.21148241174425741	2.4896978538842705	-11.858768715596508	0.16165974745132103	0.8383402525486622	0.40484636096605353	0.06383760773481151	0.9361623922652337	0.8791541985879108
29	0.539372833390037	0.2102133498464831	2.4898042016613617	-11.858982709204334	0.1629414993295661	0.8370585006704205	0.41335847085920924	0.0633975933278957	0.9366024066721473	0.8800547218179581
30	0.5352458102451578	0.209074952245764	2.489874998740879	-11.859124983092212	0.16411268805962678	0.8358873119403627	0.4218983318647176	0.06300351117368098	0.9369964888263603	0.880859881465759
31	0.5311835121068275	0.20806516371603567	2.4899062041156714	-11.859187631034313	0.16517088725977258	0.834829112740219	0.43046257387945297	0.06265441130862634	0.9373455886914137	0.8815719398816482
32	0.5271798128204376	0.20718179839018236	2.489897897810418	-11.85917110745073	0.16611367054827295	0.8338863294517194	0.43904782680028975	0.06234934376919073	0.9376506562308489	0.8821931594159604
33	0.5232283989372122	0.2064225470523433	2.489854256292035	-11.859084138490644	0.1669386115433973	0.833061388456594	0.44765072052410226	0.06208735859183312	0.9379126414082071	0.8827258024190303
34	0.5193227703272777	0.20578498435839054	2.4897835188533	-11.85894360271743	0.16764328386341504	0.8323567161365732	0.45626788494776505	0.061867505813012466	0.9381324941870296	0.8831721312411926
35	0.5154562398411288	0.20526657597368647	2.489697946200912	-11.858774384442821	0.1682252611265957	0.8317747388733872	0.4648959499681524	0.06168883546918775	0.9383111645308577	0.8835344082327822
36	0.5116219320159893	0.20486468561781956	2.4896137728754058	-11.858609203586433	0.16868211695120866	0.8313178830487659	0.47353154548213877	0.06155039759681792	0.9384496024032328	0.8838148957441335
37	0.5078127808277885	0.20457658200659934	2.4895511555078134	-11.858488426698255	0.1690114249555234	0.8309885750444395	0.48217130138659847	0.061451242232361945	0.9385487577676961	0.8840158561255813
38	0.5040238379759638	0.20440645155105408	2.489452443154822	-11.858297367758606	0.16921692522314188	0.8307830747768105	0.4908062236653885	0.06139258266072162	0.9386074173393428	0.8841342365799578
39	0.5002476050396224	0.20435693686712442	2.489278443129807	-11.857954576363998	0.16930153543163864	0.8306984645683131	0.4994339756280097	0.06137511998697542	0.9386248800130892	0.8841679915929539
40	0.49646938049907857	0.20441178103770474	2.4892166846180768	-11.857832700329485	0.16925100059891685	0.8307489994010347	0.5080685193765935	0.061393806675126	0.9386061933249387	0.8841294546885117
41	0.49268145262060525	0.20457394424366604	2.4892355819406884	-11.857870172110408	0.16906767612462392	0.8309323238753278	0.5167065401736969	0.06144959337282738	0.9385504066272373	0.8840163972465819
42	0.48887630565243423	0.2048463131636823	2.489307306884503	-11.858012421802634	0.16875391740840734	0.8312460825915448	0.5253447232818775	0.06154343072773352	0.9384565692723311	0.883826590647115
43	0.48504661443590147	0.20523169447586165	2.489407839118406	-11.858212087580974	0.1683120798499145	0.8316879201500382	0.5339797539636927	0.06167626938749845	0.9383237306125662	0.8835578062700618
44	0.4811852399192711	0.20573280823136375	2.489517021085361	-11.858429226066404	0.16774451884879285	0.8322554811511604	0.5426083174816995	0.06184905999977615	0.9381509400002885	0.8832078154953728
45	0.4772852255904464	0.2063522811078926	2.4896186143776626	-11.85863151626995	0.16705358980468984	0.8329464101952642	0.5512270990984554	0.06206275321222061	0.9379372467878442	0.8827743897029985
46	0.47333979484033634	0.20709263955148904	2.4897003549239196	-11.858794451295214	0.1662416481172529	0.8337583518827016	0.5598327840765176	0.062318299672485825	0.9376817003275791	0.8822553002728896
47	0.4693423492643269	0.2079563028155873	2.4897540046521227	-11.858901512585064	0.16531104918612943	0.8346889508138254	0.5684220576784434	0.0626166500282258	0.9373833499718395	0.8816483185849967
48	0.46528646790511485	0.20894557590685925	2.4897753976475414	-11.858944322174722	0.1642641484109669	0.8357358515889881	0.5769916051667904	0.06295875492709452	0.9370412450729713	0.8809512160192705
49	0.46116590743609154	0.21006264244793893	2.489764479198617	-11.858922769163431	0.16310330119141273	0.8368966988085421	0.5855381118041155	0.06334556501674599	0.9366544349833205	0.8801617639556615
50	0.45697460328051565	0.21130955746770552	2.4897253365179868	-11.858845107434407	0.16183086292711435	0.8381691370728399	0.5940582628529762	0.0637780309448342	0.9362219690552331	0.8792777337741202
51	0.45270667165789413	0.21268824013039977	2.4896662203373143	-11.858728022528563	0.16044918901771923	0.8395508109822339	0.60254874357593	0.06425710335901313	0.9357428966410555	0.8782968968545974
52	0.44835641254528935	0.2142004664154623	2.489599557000342	-11.858596666498828	0.15896063486287476	0.8410393651370767	0.6110062392355339	0.0647837329069368	0.9352162670931332	0.8772170245770438
53	0.4439183135376943	0.21584786176060078	2.4895419511144317	-11.858484660523457	0.15736755586222842	0.8426324441377206	0.6194274350943453	0.06535887023625919	0.9346411297638126	0.8760358883214097
54	0.4393878424128169	0.2176314475467075	2.4895136233055206	-11.858420512590055	0.15567340312779512	0.8443265968721512	0.6278081686162494	0.06598302293088304	0.934016977069191	0.8747510864390652
55	0.43476830045308984	0.21955110761629582	2.489505936765082	-11.858286181651337	0.15389150598139148	0.8461084940185559	0.6361363765606562	0.06665417796022724	0.9333458220398475	0.8733571821910213
56	0.4300468179719201	0.22161842933955145	2.489505013186598	-11.858234804681045	0.15201216604202836	0.8479878339579201	0.6444173466520778	0.06738095954006228	0.9326190404600134	0.8718512365916794
57	0.4252228784261526	0.22383662470940857	2.489504598701889	-11.858235858254414	0.15004244852212054	0.8499575514778288	0.6526433939506874	0.06816462398875914	0.9318353760113175	0.8702283375310795
58	0.4202967687462523	0.22620865849643013	2.489500962820056	-11.858265475803629	0.1479894186340828	0.8520105813658674	0.6608068335166578	0.06900642762468885	0.9309935723753888	0.8684835728992619
59	0.41526960926662976	0.22873723358792186	2.4894925613114154	-11.85830600151267	0.14586014159032992	0.8541398584096211	0.6688999804101624	0.06990762676622246	0.9300923732338563	0.8666120305862667
60	0.4101433826662085	0.23142477623280844	2.489479662471905	-11.858345441661614	0.1436616826032767	0.8563383173966752	0.6769151496913743	0.07086947773173098	0.9291305222683489	0.864608798482134
61	0.40492096154507634	0.23427342122932404	2.489463935561276	-11.858376809301543	0.14140110688533786	0.8585988931146148	0.6848446564204665	0.07189323683958544	0.9281067631604957	0.862468964476904
62	0.39960613425237557	0.23728499709464856	2.4894480007005084	-11.858397359866014	0.13908547964892826	0.8609145203510253	0.6926808156576124	0.07298016040815686	0.9270198395919256	0.860187616460617
63	0.39420362857247854	0.24046101125777075	2.4894349399889286	-11.858407717059801	0.13672186610646264	0.8632781338934918	0.7004159424629847	0.07413150475581624	0.9258684952442676	0.857759842323313
64	0.388719132870961	0.243802635319048	2.489427770066561	-11.858410890095104	0.13431733147035574	0.8656826685295996	0.7080423518967568	0.07534852620093466	0.9246514737991507	0.8551807299550322
65	0.38315931429893757	0.2473106904221849	2.4894288768148085	-11.858411185064856	0.13187894095302238	0.868121059046934	0.7155523590191017	0.07663248106188311	0.9233675189382038	0.8524453672458149
66	0.3775318336539421	0.2509856327866473	2.489439413376102	-11.858413014960899	0.12941375976687736	0.8705862402330802	0.7229382788901927	0.07798462565703261	0.922015374343056	0.8495488420857011
67	0.37184535649774236	0.2548275394508823	2.489458663204025	-11.858419614585188	0.12692885312433544	0.8730711468756233	0.7301924265702027	0.07940621630475421	0.9205937836953362	0.8464862423647311
68	0.36610956013625645	0.2588360942791119	2.4894833704592676	-11.858431668405668	0.12443128623781137	0.8755687137621487	0.737307117119305	0.08089850932341892	0.9191014906766733	0.8432526559729451
69	0.360335136074099	0.26301057428693375	2.489507040778924	-11.858445861332072	0.12192812431971997	0.8780718756802416	0.7442746655976724	0.08246276103139774	0.9175372389686964	0.839843170800383
70	0.3545337875662158	0.2673498363434562	2.4895192163086106	-11.858453364504204	0.11942643258247601	0.8805735674174872	0.7510873870654785	0.08410022774706175	0.9158997722530345	0.8362528747370852
71	0.34871773403237405	0.2718504379906589	2.4895191490275046	-11.85845298269866	0.11693346558077021	0.8830665344191939	0.7577386825520699	0.08581100491651131	0.9141889950835872	0.8324777117197298
72	0.34290011529542813	0.2765057709012907	2.4895191435049986	-11.858452975264289	0.11445671180694666	0.8855432881930184	0.7642223682920687	0.08759348110884914	0.9124065188912517	0.8285150566851096
73	0.3370932335524213	0.28130892750685055	2.4895330830354645	-11.858475033981572	0.11200235088424414	0.8879976491157218	0.7705334330216045	0.08944623253579749	0.9105537674643057	0.8243627542652098
74	0.3313132234910878	0.2862563002331726	2.48952568369803	-11.8584632536461	0.10957822368656601	0.8904217763134007	0.7766642103198154	0.09136960915208907	0.9086303908480166	0.8200162303113175
75	0.3255725736231644	0.2913386442268193	2.4895131987714345	-11.858443301397418	0.10718975530610715	0.8928102446938604	0.7826110703276768	0.09336120411074159	0.9066387958893667	0.8154746100172807
76	0.31988381561101625	0.2965460745635269	2.4895085136782376	-11.858435786366076	0.10484208372301362	0.8951579162769547	0.7883708606207541	0.09541829141315152	0.9045817085869594	0.8107374474803637
77	0.3142600120866148	0.3018687298412611	2.4895135829452695	-11.85844396227808	0.1025403469174315	0.8974596530825377	0.7939404287746122	0.09753814506071536	0.9024618549393983	0.8058042967978306
78	0.3087232785893065	0.3072967815001475	2.4894941746967403	-11.858378097780275	0.10028968917447208	0.8997103108254979	0.7993032447694904	0.09971803264711036	0.9002819673530063	0.8006747272131101
79	0.30610434774741685	0.3127851931449813	2.481228501499916	-11.833581071470194	0.09810790191652558	0.9018920980834451	0.8001159969698718	0.101940710045361	0.8980592899547586	0.7953824408412303
80	0.30408284149216847	0.3182640337228738	2.471621152963312	-11.80475903672353	0.09601832233253227	0.9039816776674391	0.8001159970645525	0.10417793375612103	0.8958220662440015	0.7899885764422293
81	0.3021418537578147	0.3237296149766558	2.4621339716852457	-11.776436803710805	0.09402206025804782	0.9059779397419244	0.8001159477924839	0.10642994404707441	0.893570055953051	0.7844954105204335
82	0.3002759654363982	0.32916724746761067	2.452867522775251	-11.748731329833614	0.0921122406365435	0.9078877593634297	0.8001158928195564	0.10868755970570707	0.8913124402944212	0.7789098405699464
83	0.2984832211688969	0.33456887130520047	2.443840518956671	-11.721677732540813	0.09028567535379951	0.9097143246461744	0.8001158446715679	0.11094640508472689	0.8890535949154044	0.7732362877455881
84	0.2967623916414234	0.33992823200417216	2.435052254547349	-11.695289152555901	0.08854001281741011	0.9114599871825645	0.8001158053903367	0.11320319630919505	0.8867968036909392	0.7674785727686099
85	0.29511216001083684	0.34523950209069404	2.4265010682635655	-11.669575425148617	0.0868729014349695	0.9131270985650056	0.8001157770176809	0.11545464950417281	0.8845453504959645	0.7616405163602625
86	0.29353112641059675	0.3504972802581239	2.4181846670818103	-11.644543675025592	0.0852819896140718	0.9147180103859038	0.8001157615954186	0.1176974807947214	0.8823025192054191	0.7557259392417972
87	0.2920178123236107	0.3556965893021004	2.410100428158027	-11.620198870297113	0.08376492576231129	0.9162350742376647	0.8001157611653683	0.11992840630590203	0.8800715936942417	0.7497386621344649
88	0.29057066482206517	0.3608328729046392	2.4022456787452082	-11.596544335113467	0.08231935828728214	0.9176806417126941	0.800115777769348	0.12214414216277591	0.8778558578373712	0.7436825057595169
89	0.2891880606742214	0.36590199133827517	2.3946179541269057	-11.573582220831735	0.0809429355965785	0.9190570644033981	0.8001158134491759	0.12434140449040432	0.8756585955097461	0.7375612908382038
90	0.2878683103181675	0.37090021616238233	2.3872152336615002	-11.551313935807082	0.07963330609779463	0.9203666939021822	0.8001158702466704	0.1265169094138484	0.8734830905863054	0.731378838091777
91	0.28660966170251134	0.37582422398461346	2.3800361551153797	-11.529740534115685	0.07838811819852472	0.9216118818014521	0.8001159502036496	0.12866737305816947	0.8713326269419879	0.7251389682414873
92	0.2854103039940077	0.38067108936093147	2.3730802075568382	-11.508863063720263	0.07720502030636293	0.9227949796936141	0.8001160553619315	0.1307895115484287	0.8692104884517322	0.7188455020085859
93	0.28426837115210934	0.3854382769079632	2.3663479031882773	-11.488682874791024	0.07608166082890347	0.9239183391710737	0.8001161877633347	0.13288004100968737	0.8671199589904771	0.7125022601143237
94	0.2831819453704334	0.39012363270138517	2.3598409286128703	-11.46920188909905	0.07501568817374055	0.9249843118262366	0.8001163494496772	0.1349356775670066	0.8650643224331614	0.7061130632799518
95	0.28214906038513843	0.39472537503375427	2.3535622761620543	-11.450422831607113	0.07400475074846838	0.9259952492515089	0.8001165424627773	0.1369531373454477	0.8630468626547241	0.6996817322267214
96	0.2811677046502038	0.39924208460461985	2.3475163560501446	-11.432349425594337	0.07304649696068108	0.9269535030392961	0.8001167688444532	0.1389291364700719	0.8610708635301035	0.6932120876758832
97	0.2802358243796089	0.40367269421490304	2.3417090902689255	-11.414986552863354	0.07213857521797296	0.9278614247820044	0.800117030636523	0.1408603910659404	0.8591396089342388	0.6867079503486885
98	0.27935132645640603	0.40801647803640445	2.3361479892847816	-11.398340380788262	0.07127863392793812	0.9287213660720393	0.8001173298808049	0.1427436172581144	0.8572563827420686	0.6801731409663883
99	0.2785234585826225	0.41228831159117263	2.330602250851178	-11.382128212229201	0.07047518941151137	0.9295248105884745	0.8001174388718986	0.14459022907930974	0.8554097709208769	0.673595615982908
100	0.27774083802785554	0.4164745403358407	2.325279371144556	-11.36660150521994	0.0697169634986156	0.9302830365013796	0.8001174388718986	0.1463850524391451	0.8536149475610444	0.6669927642470828
101	0.2769963214084167	0.42056924167648935	2.3202941457517126	-11.351894087133449	0.06899689184815039	0.9310031081518503	0.8001174388718986	0.14811867730056483	0.8518813226996268	0.6603748583759154
102	0.27628938952930504	0.42457578239432125	2.3156225785628806	-11.337970972340333	0.06831428259510136	0.9316857174049017	0.8001174388718986	0.14979030167734406	0.8502096983228492	0.653742693317436
103	0.2756195084256514	0.4284975463524048	2.311242685052017	-11.324799830756454	0.06766844387445421	0.9323315561255484	0.8001174388718986	0.15139912358325788	0.8486008764169366	0.6470970640196755
104	0.27498612997926775	0.4323379339380966	2.3071344375735174	-11.312350929615238	0.06705868382119454	0.9329413161788055	0.8001174388718986	0.15294434103208143	0.847055658968114	0.6404387654306642
105	0.274388692523707	0.4361003616722212	2.3032797156589764	-11.300597078356493	0.06648431057030796	0.9335156894296877	0.8001174388718986	0.15442515203758986	0.8455748479626062	0.6337685924984328
106	0.2738266214378282	0.43978826198699145	2.2996622603296277	-11.28951357562535	0.06594463225678016	0.9340553677432099	0.8001174388718986	0.15584075461355823	0.8441592453866383	0.6270873401710118
107	0.27329932972786986	0.4434050831744968	2.2962676315746355	-11.279078157500743	0.06543895701559674	0.9345610429843869	0.8001174388718986	0.1571903467737617	0.8428096532264354	0.6203958033964317
108	0.2728062185980299	0.4469542895074134	2.293083168269458	-11.269270946193625	0.06496659298174334	0.9350334070182337	0.8001174388718986	0.1584731265319754	0.8415268734682224	0.613694777122723
109	0.2723466780095535	0.4504393615334218	2.290097949923453	-11.260074398571199	0.06452684829020562	0.9354731517097651	0.8001174388718986	0.1596882919019744	0.8403117080982242	0.6069850562979164
110	0.2719200872283275	0.45386379654464726	2.287302759753058	-11.2514732539751	0.0641190310759692	0.935880968923996	0.8001174388718986	0.16083504089753387	0.8391649591026659	0.6002674358700424
111	0.27152581536098297	0.4572311092232548	2.284690048676943	-11.2434544809085	0.06374244947401969	0.9362575505259412	0.8001174388718986	0.16191257153242888	0.8380874284677724	0.5935427107871313
112	0.2711632218795037	0.460544832464156	2.282253899923174	-11.236007222269189	0.06339641161934279	0.9366035883806155	0.8001174388718986	0.1629200818204346	0.8370799181797688	0.586811675997214
113	0.27083165713434365	0.4638085183755972	2.2799899940259376	-11.229122738902664	0.06308022564692407	0.9369197743530339	0.8001174388718986	0.16385676977532615	0.8361432302248799	0.5800751264483208
114	0.27053046285604965	0.46702573945821224	2.277895574071054	-11.222794351340372	0.06279319969174921	0.9372068003082111	0.8001174388718986	0.16472183341087862	0.8352781665893309	0.5733338570884822
115	0.27025897264539345	0.47020008996293183	2.275969411125412	-11.217017379673198	0.06253464188880382	0.9374653581111622	0.8001174388718986	0.16551447074086711	0.8344855292593466	0.566588662865729
116	0.2700165124520092	0.4733351874279491	2.2742117698558006	-11.211789081588552	0.06230386037307356	0.9376961396269019	0.8001174388718986	0.16623387977906678	0.8337661202211522	0.5598403387280916
117	0.26980240104153963	0.47643467439473897	2.2726243744072443	-11.20710858867034	0.06210016327954405	0.9378998367204451	0.8001174388718986	0.16687925853925276	0.8331207414609724	0.5530896796236006
118	0.26961595045128806	0.4795022203029321	2.2712103746702725	-11.20297684112462	0.06192285874320092	0.9380771412568066	0.8001174388718986	0.16744980503520013	0.8325501949650324	0.5463374805002862
119	0.26945646643437926	0.48254152356363733	2.269974313120313	-11.199396521149271	0.061771254899029834	0.9382287451010013	0.8001174388718986	0.16794471728068402	0.8320552827195571	0.5395845363061794
120	0.26932324889242587	0.4855563138105988	2.2689220924611844	-11.196371985213556	0.06164465988201641	0.9383553401180441	0.8001174388718986	0.1683631932894796	0.8316368067107716	0.5328316419893105
121	0.2692155922967039	0.48855035432836236	2.2680609443483526	-11.193909195552735	0.061542381827146275	0.9384576181729498	0.8001174388718986	0.1687044310753619	0.8312955689249008	0.5260795924977101
122	0.2691327860978332	0.4915274446564109	2.2673993995069264	-11.192015651214334	0.061463728869405085	0.9385362711307333	0.8001174388718986	0.16896762865210613	0.8310323713481695	0.5193291827794088
123	0.26907411512396784	0.4944914233680108	2.2669472595944837	-11.190700319015992	0.06140800914377847	0.9385919908564095	0.8001174388718986	0.16915198403348733	0.8308480159668031	0.5125812077824371
124	0.26899527378458954	0.4974392916029432	2.2666771199840037	-11.190274118297754	0.06137589864399788	0.9386241013562059	0.8001759481925862	0.16928387044158705	0.8307161295587069	0.5058531463196342
125	0.26897632705647656	0.5003830253227665	2.266502492293844	-11.19013629683285	0.061367609392964324	0.938632390607238	0.800189222019851	0.16933890422826445	0.8306610957720276	0.4991242073528931
126	0.2690490901964038	0.503329944114393	2.266405222160512	-11.190058747364873	0.06138289760325154	0.9386171023969497	0.8001155947746951	0.16930501289461644	0.830694987105674	0.49238759772621393
127	0.26921533082798244	0.5062832650475086	2.266370167856925	-11.190030405423233	0.06142192259835849	0.9385780774018422	0.7999529416903219	0.16918435498811485	0.8308156450121744	0.48564664889777354
128	0.26947676692183964	0.5092460601464543	2.266383608431986	-11.190040912434075	0.06148484370178416	0.9385151562984163	0.7996991379999354	0.16897908905623152	0.8310209109440567	0.47890469232574895
129	0.2698350644572155	0.5122212541822472	2.2664332117775094	-11.190080695287287	0.06157182023702752	0.938428179763173	0.799352058936739	0.16869137364643827	0.8313086263538492	0.4721650594683168
130	0.27029183507991794	0.5152116222405713	2.266508003832074	-11.190141035289999	0.06168301152758756	0.9383169884726135	0.7989095797339362	0.1683233673062069	0.8316766326940798	0.46543108178365383
131	0.27084863375828516	0.5182197870656312	2.266598338127949	-11.190214125791996	0.06181857689696324	0.9381814231032385	0.7983695756247307	0.1678772285830092	0.8321227714172768	0.4587060907299371
132	0.27150695643884015	0.5212482161823859	2.2666958649700577	-11.190293117809167	0.06197867566865355	0.9380213243315491	0.797729921842326	0.16735511602431707	0.8326448839759683	0.4519934177653433
133	0.2722682377033673	0.5242992188022157	2.2667934996138275	-11.190372153022382	0.06216346716615746	0.9378365328340463	0.7969884936199259	0.16675918817760227	0.8332408118226823	0.4452963943480491
134	0.2731338484291832	0.5273749425194918	2.266885388882695	-11.190446383590665	0.06237311071297396	0.937626889287231	0.7961431661907337	0.16609160359033665	0.8339083964099471	0.43861835193623155
135	0.27410509345441547	0.5304773698088434	2.266966875736916	-11.190511978289171	0.06260776563260201	0.9373922343676044	0.7951918147879531	0.165354520809992	0.8346454791902908	0.43196262198806734
136	0.2751832092501483	0.5336083143351266	2.2670344613733358	-11.190566114563088	0.06286759124854059	0.9371324087516674	0.7941323146447877	0.1645500983840401	0.8354499016162414	0.42533253596173326
137	0.27636936160133563	0.5367694170902109	2.267085764501613	-11.19060695617757	0.0631527468842887	0.9368472531159208	0.7929625409944411	0.16368049485995287	0.8363195051403273	0.4187314253154062
138	0.277664643298427	0.5399621423727099	2.267119477505731	-11.190633616240168	0.06346339186334528	0.9365366081368657	0.791680369070117	0.1627478687852021	0.8372521312150762	0.41216262150726296
139	0.27907007184169796	0.5431877736286768	2.267135319260845	-11.190646105474599	0.06379968550920934	0.9362003144910032	0.7902836741050187	0.1617543787072595	0.8382456212930166	0.4056294559954802
140	0.2805865871603155	0.5464474091730895	2.2671339844341274	-11.190645265731966	0.06416178714537983	0.935838212854834	0.78877033133235	0.16070218317359705	0.8392978168266765	0.39913526023823503
141	0.2822150493482227	0.5497419578136393	2.2671170891544747	-11.190632688836605	0.06454985609535574	0.9354501439048595	0.7871382159853145	0.15959344073168646	0.840406559268584	0.39268336569370405
142	0.28395623641896395	0.5530721343999276	2.2670871129890022	-11.19061062097711	0.06496405168263605	0.9350359483175803	0.7853852032971157	0.1584303099289996	0.8415696900712671	0.38627710382006414
143	0.2858108420816218	0.55643845532266	2.2670473372145272	-11.190581852968053	0.06540453323071975	0.9345954667694977	0.7835091685009572	0.15721494931300822	0.8427850506872543	0.379919806075492
144	0.2877794735400851	0.5598412339888053	2.2670017794188793	-11.190549596823107	0.06587146006310578	0.9341285399371123	0.7815079868300426	0.15594951743118424	0.8440504825690733	0.3736148039181646
145	0.2898626493179079	0.5632805762999653	2.2669551245102557	-11.190517349195428	0.06636499150329316	0.9336350084969255	0.7793795335175756	0.1546361728309994	0.8453638271692526	0.36736542880625866
146	0.2920607971110721	0.5667563761623728	2.266912652252347	-11.190488742355466	0.06688528687478083	0.933114713125438	0.7771216837967596	0.15327707405992555	0.8467229259403201	0.36117501219795095
147	0.2943742516710089	0.570268311057998	2.266880161478948	-11.190467383489747	0.06743250550106779	0.9325674944991509	0.7747323129007982	0.1518743796654345	0.8481256203348039	0.35504688555141845
148	0.29680325272028685	0.5738158377072144	2.266863891173979	-11.190456683216842	0.06800680670565301	0.9319931932945652	0.7722092960628952	0.1504302481949981	0.8495697518052322	0.3489843803248379
149	0.2993333184121913	0.5774015952310213	2.26699377581335	-11.190685489478923	0.06860087488951574	0.9313991251107027	0.7695608129689135	0.1489464461122158	0.8510535538880096	0.3429842665422042
150	0.30198442404684545	0.5810164800510401	2.2670985752701407	-11.190869332779062	0.06922298238274818	0.9307770176174714	0.7667683555050735	0.1474312163707353	0.8525687836294868	0.33706076822779535
151	0.30476226293335806	0.5846556019765593	2.267129681176918	-11.190923830233155	0.06987551491275709	0.9301244850874644	0.7638246936282506	0.14588928834117137	0.8541107116590476	0.3312213212837344
152	0.3076644358715655	0.5883159926046975	2.2671061873799045	-11.19088278608869	0.07055705555094821	0.9294429444492758	0.7607285927076323	0.14432439735935884	0.8556756026408573	0.325469548956043
153	0.31068851144203374	0.5919943207962948	2.267045593721737	-11.190777056798257	0.07126618736872727	0.9287338126314995	0.7574788181124064	0.14274027876113257	0.8572597212390807	0.3198090744907431
154	0.3138320336748216	0.5956868924383298	2.266963606814417	-11.190634226780944	0.07200149343750002	0.9279985065627299	0.7540741352117603	0.14114066788232746	0.858859332117883	0.3142435211338562
155	0.3170925297179384	0.5993896511672039	2.266873953996134	-11.190478306501241	0.07276155682867222	0.9272384431715609	0.7505133093748817	0.13952930005877828	0.8604706999414294	0.3087765121314039
156	0.32046751749864244	0.6030981801302654	2.2667882106162303	-11.190329454231193	0.07354496061364957	0.9264550393865868	0.7467951059709582	0.13790991062631996	0.862090089373885	0.30341167072940817
157	0.32395451337121606	0.6068077048609157	2.266715640827133	-11.190203722906958	0.07435028786383784	0.9256497121364017	0.7429182903691776	0.13628623492078737	0.8637137650794147	0.2981526201738906
158	0.327551039745362	0.6105130973402766	2.2666630521333895	-11.190112833588888	0.07517612165064277	0.9248238783495997	0.7388816279387271	0.13466200827801528	0.8653379917221837	0.2930029837108728
159	0.3312546326898908	0.6142088813156847	2.26663466405407	-11.190063977180765	0.0760210450454701	0.9239789549547749	0.7346838840487946	0.13304096603383866	0.8669590339663572	0.2879663845863767
160	0.3350628495069106	0.6178892389432422	2.266631991392729	-11.19005964625288	0.07688364111972557	0.9231163588805213	0.7303238240685677	0.13142684352409226	0.8685731564761002	0.2830464460464237
161	0.33897327627228707	0.6215480188182541	2.2666537427758433	-11.190097499038362	0.07776249294481488	0.9222375070554335	0.725800213367234	0.12982337608461106	0.8701766239155778	0.2782467913370359
162	0.3429835353387207	0.6251787454536701	2.266695735311555	-11.190170257923967	0.07865618359214385	0.9213438164081051	0.7211118173139809	0.1282342990512298	0.8717657009489552	0.2735710437042346
163	0.34709129279837175	0.6287746302625722	2.266750826431289	-11.19026564502494	0.07956329613311819	0.9204367038671305	0.7162574012779961	0.12666334775978338	0.8733366522403974	0.2690228263940416
164	0.3512942659025817	0.6323285840963482	2.2668088642012396	-11.190366357707184	0.08048241363914359	0.9195175863611038	0.7112357306284675	0.12511425754610672	0.8748857424540695	0.2646057626524789
165	0.35559023043685745	0.63583323138545	2.266856657622352	-11.190450087185003	0.08141211918162586	0.9185878808186191	0.7060455707345822	0.12359076374603459	0.8764092362541366	0.26032347572556785
166	0.3599738172323805	0.6392838106552079	2.266901389933733	-11.190523569769244	0.08235084032015967	0.9176491596800825	0.7006901393642939	0.12209456837345557	0.8779054316267105	0.2561771627497961
167	0.36443025558027886	0.6426832073100912	2.267022786837579	-11.19070229774649	0.08329533964532546	0.9167046603549195	0.6951848345411892	0.12062220556876094	0.8793777944314025	0.2521613373107684
168	0.3689754492674714	0.646005716171185	2.2670756200009246	-11.190779282293043	0.08424313945573897	0.9157568605445088	0.6895020180042095	0.11919016787956994	0.8808098321205909	0.24829400366782278
169	0.3736019855887826	0.6492468314057305	2.2670797972967707	-11.190785556767707	0.08519111597589245	0.9148088840243583	0.6836471369052157	0.11779970339125669	0.882200296608902	0.24457518426940436
170	0.37830278498384096	0.6524020626728436	2.2670520881831404	-11.190746775408225	0.08613614543027809	0.9138638545699758	0.6776256383960686	0.11645206018919528	0.8835479398109612	0.2410049015639584
171	0.3830711150884071	0.6554669437265787	2.267006274074217	-11.190683529780088	0.08707510404338822	0.9129248959568689	0.6714429696286283	0.11514848635875966	0.8848515136413948	0.23758317799992976
172	0.38790060331134074	0.658437041170326	2.2669533209166666	-11.19061171467196	0.08800486803971506	0.9119951319605452	0.6651045777547555	0.11389022998532394	0.8861097700148287	0.2343100360257636
173	0.3927852479918092	0.6613079633521288	2.2669015717810854	-11.190542937614362	0.08892231364375083	0.9110776863565127	0.6586159099263112	0.11267853915426221	0.8873214608458886	0.23118549808990518
174	0.3977194281943944	0.6640753693899907	2.2668569575291118	-11.190484966580104	0.08982431707998785	0.9101756829202787	0.6519824132951555	0.11151466195094843	0.8884853380492007	0.22820958664079935
175	0.4026979122024587	0.6667349783157058	2.2668232238431116	-11.190442210774465	0.09070775457291833	0.9092922454273513	0.645209535013149	0.1103998464607567	0.8896001535393908	0.2253823241268913
176	0.4077158647724801	0.6692825783252376	2.2668021731031436	-11.190416229732445	0.0915695023470345	0.9084304976532382	0.6383027222321529	0.10933534076906112	0.8906646592310848	0.22270373299662624
177	0.41276885321405216	0.6717140361231315	2.2667939197626064	-11.190406266206356	0.09240643662682865	0.9075935633734469	0.6312674221040269	0.10832239296123566	0.8916776070389089	0.22017383569844903
178	0.41785285236187214	0.674025306347932	2.2667971580088357	-11.190409798550387	0.09321543363679304	0.9067845663634851	0.6241090817806321	0.1073622511226544	0.8926377488774887	0.21779265468080494
179	0.4229642485073253	0.6762124410650445	2.2668094405989185	-11.19042310849465	0.09399336960141985	0.9060066303988609	0.6168331484138292	0.10645616333869144	0.8935438366614502	0.21556021239213907
180	0.42809984235817855	0.6782715993129611	2.2668274678369125	-11.190441860356884	0.09473712074520142	0.9052628792550815	0.6094450691554782	0.10560537769472075	0.8943946223054194	0.21347653128089636
181	0.4332568510954623	0.6801990566882389	2.266847385709803	-11.1904616878766	0.09544356329262994	0.9045564367076551	0.6019502911574405	0.10481114227611645	0.8951888577240223	0.21154163379552207
182	0.43843290959682435	0.6819912149540973	2.266865092231396	-11.19047878498553	0.09610957346819772	0.903890426532089	0.5943542615715759	0.10407470516825253	0.8959252948318848	0.20975554238446115
183	0.4436260708954768	0.6836446116569757	2.266876551061876	-11.190490496964243	0.09673202749639696	0.9032679725038911	0.5866624275497453	0.10339731445650308	0.8966026855436328	0.20811827949615874
184	0.4488355029279165	0.6851555779032543	2.2667783874644316	-11.190302224490821	0.09731978332599454	0.9026802166742944	0.5788838558770177	0.10277855143436848	0.8972214485657635	0.20663288706546443
185	0.4540555026924319	0.6865241849922692	2.2666723857812903	-11.190099409424313	0.09785986066205155	0.9021401393382384	0.5710262138589479	0.10221911506281453	0.8977808849373135	0.20529511107084794
186	0.45928319853113914	0.68774961024337	2.2666362715173074	-11.190030152508056	0.09834109411322803	0.9016589058870631	0.5630955690092951	0.10172015480706925	0.8982798451930565	0.20410175217129753
187	0.46451749568964185	0.688830276465316	2.266651218718944	-11.190058978670827	0.0987635427598337	0.9012364572404586	0.555100241033161	0.10128166432520527	0.8987183356749197	0.20305280856623154
188	0.4697573900638077	0.6897647949064941	2.266700489070989	-11.19015405201122	0.09912726568217835	0.9008727343181153	0.5470485496356466	0.1009036372752952	0.89909636272483	0.20214827845506816
189	0.4750019552623406	0.6905519665928502	2.2667694829631833	-11.19028738552037	0.09943232196057168	0.9005676780397233	0.538948814521854	0.10058606731541164	0.8994139326847146	0.2013881600372258
190	0.48025032985035265	0.6911907834753803	2.2668457867834455	-11.190435030652925	0.09967877067532344	0.9003212293249728	0.5308093553968846	0.10032894810362726	0.8996710518965007	0.2007724515121227
191	0.4855017047493651	0.6916804293872778	2.266919214787735	-11.190577242666139	0.09986667090674337	0.900133329093554	0.5226384919658397	0.10013227329801465	0.899867726702115	0.20030115107917715
192	0.4907553107693041	0.6920202808108377	2.266981844150222	-11.190698618235807	0.09999608173514118	0.9000039182651571	0.514444543933821	0.09999603655664643	0.9000039634434849	0.19997425693780752
193	0.49601040624818493	0.6922099074542153	2.2670280420523774	-11.19078820247066	0.10006706224082666	0.8999329377594725	0.5062358310059305	0.09992023153759524	0.9000797684625372	0.19979176728743206
194	0.501266264775306	0.6922490726381376	2.2670544839265974	-11.190839563083031	0.10007967150410951	0.8999203284961902	0.49802067288726903	0.09990485189893371	0.9000951481011992	0.1997536803274691
195	0.5065221629739025	0.6921377334926664	2.2670601622293525	-11.19085083012957	0.10003396860529949	0.8999660313950004	0.48980738928293854	0.09994989129873443	0.9000501087013978	0.19985999425733691
196	0.5117773683193422	0.691876040964111	2.267046385379766	-11.190824700406619	0.09993001262470631	0.9000699873755934	0.4816042998980408	0.10005534339507002	0.8999446566050602	0.2001107072764538
197	0.517031126969071	0.6914643396321912	2.267016766761354	-11.190768406263594	0.09976786264263973	0.9002321373576595	0.4734197244376769	0.10022120184601313	0.8997787981541133	0.20050581758423813
198	0.5222826515806428	0.6909031673375449	2.266977203945709	-11.19069364927729	0.09954757773940949	0.9004524222608887	0.4652619826069486	0.10044746030963639	0.8995525396904842	0.20104532338010814
199	0.5275311090943028	0.6901932546196832	2.2669358485560807	-11.1906164999026	0.09926921699532532	0.9007307830049713	0.45713939411095783	0.10073411244401237	0.8992658875561002	0.2017292228634821
200	0.5327756084567148	0.6893355239654881	2.266903067444731	-11.190557264873522	0.09893283949069695	0.9010671605095976	0.44906027865480547	0.10108115190721374	0.898918848092888	0.2025575142337784
201	0.5380151882625526	0.6883310888683534	2.2668913961097044	-11.19054032476653	0.09853850430583412	0.9014614956944577	0.4410329559435935	0.10148857235731312	0.8985114276427748	0.20353019569041533
202	0.5432606701269671	0.6871914871871851	2.2669383306158606	-11.190561676229173	0.09809303038535491	0.9019069696149362	0.43304512921984245	0.10194814690355726	0.8980518530965304	0.20464331622689397
203	0.5484918302652335	0.6859013735341737	2.2669637836587917	-11.190576827152103	0.09759314950490866	0.9024068504953813	0.42513516804168994	0.10247158050434813	0.8975284194957397	0.20590594655409067
204	0.5537079743312036	0.6844635124176838	2.2669686399890345	-11.19058031874992	0.09704187145403347	0.9029581285462549	0.41730886754696767	0.10305776163925769	0.8969422383608306	0.20731810796412886
205	0.5589083045569675	0.6828811142477437	2.2669560869513807	-11.190570098535623	0.0964423263521912	0.9035576736480952	0.40957150301635703	0.1037053735130595	0.8962946264870294	0.2088796929990631
206	0.5640916061341232	0.6811575493641702	2.266930208629577	-11.190546787474076	0.09579764431884369	0.9042023556814405	0.40192834973053854	0.10441309933052724	0.8955869006695625	0.21059059420094806
207	0.5692562464483585	0.6792963378370245	2.2668956510373386	-11.190513091755198	0.09511095547345279	0.9048890445268288	0.3943846829701935	0.10517962229643445	0.8948203777036562	0.21245070411183828
208	0.5744001748777037	0.6773011392502667	2.266857292942234	-11.190473207733818	0.0943853899354804	0.9056146100647985	0.38694577801600333	0.10600362561555471	0.8939963743845369	0.21445991527378824
209	0.5795209232219903	0.6751757424867909	2.266819923252723	-11.190432223182242	0.09362407782438831	0.9063759221758878	0.3796169101486485	0.10688379249266168	0.8931162075074309	0.21661812022885274
210	0.5846156068319759	0.6729240555324009	2.266787925901017	-11.19039551819531	0.09283014925963841	0.9071698507406347	0.37240335464881036	0.10781880613252892	0.8921811938675648	0.2189252115190862
211	0.5896809265071785	0.6705500953156724	2.266764973151381	-11.190368169236255	0.09200673436069258	0.9079932656395776	0.3653103867971702	0.10880734973992999	0.8911926502601647	0.2213810816865432
212	0.594713171231688	0.668057977600034	2.2667537282632626	-11.190354359930089	0.09115696324701261	0.9088430367532546	0.3583432818744086	0.10984810651963856	0.8901518934804572	0.22398562327327842
213	0.5997082218171012	0.6654519069437835	2.2667555584493746	-11.190356802315577	0.0902839660380604	0.909716033962204	0.3515073151612069	0.11093975967642819	0.8890602403236685	0.2267387288213464
214	0.6046615555212725	0.6627361667431495	2.2667702590970675	-11.190376172371368	0.08939087285329782	0.910609127146964	0.3448077619382464	0.11208099241507244	0.887919007585025	0.22964029087280163
215	0.6095682517107486	0.6599151093728911	2.266795790272946	-11.190410563750453	0.08848081381218667	0.9115191861880727	0.3382498974862077	0.11327048794034497	0.886729512059753	0.23269020196969886
216	0.6144229986335994	0.6569931464383254	2.2668280266099634	-11.19045496380146	0.08755691903418883	0.9124430809660683	0.33183899708577214	0.11450692945701937	0.8854930705430791	0.23588835465409264
217	0.6192201013678553	0.6539747391520595	2.266860521786688	-11.19050075613502	0.08662231863876621	0.9133776813614891	0.32558033601762093	0.11578900016986916	0.8842109998302295	0.23923464146803733
218	0.6239534910088982	0.6508643888480996	2.2668842889514416	-11.190535254215128	0.08568014274538056	0.9143198572548733	0.3194791895624347	0.11711538328366804	0.8828846167164306	0.24272895495358784
219	0.6286311266089393	0.6476730331932014	2.2670061943748765	-11.190741753032238	0.0847267703314945	0.9152732296687591	0.3135260325258265	0.11848140236164173	0.8815185976384625	0.24636465270066352
220	0.6332476987912993	0.6444063372519053	2.267213268961383	-11.191094542233458	0.08376656537873864	0.9162334346215153	0.3077236803459199	0.1198844394780598	0.8801155605220562	0.25014101895947394
221	0.6377748473794655	0.6410608905048516	2.267309367778796	-11.191258844622286	0.08281398732969733	0.9171860126705554	0.3020978696985348	0.12132676647516603	0.8786732335249576	0.25406665682310803
222	0.6422108939893285	0.6376451539717173	2.2673211556143587	-11.191279075138095	0.08187021582157222	0.9181297841786784	0.2966469611837391	0.12280458149972266	0.8771954185004053	0.25813773453518146
223	0.6465541059153961	0.6341673596742565	2.2672724563449727	-11.19119528947238	0.08093643049156499	0.9190635695086825	0.29136931540160044	0.12431408269849188	0.8756859173016375	0.26235042033930966
224	0.6508027022293649	0.6306354898195041	2.2671842013386874	-11.191042987001994	0.08001381097687717	0.9199861890233665	0.28626329295218605	0.12585146821823606	0.8741485317818924	0.2667008824791086
225	0.6549548598806878	0.6270572578017649	2.267074405507187	-11.190852971404633	0.07910353691471043	0.920896463085529	0.28132725443556367	0.12741293620571742	0.8725870637944085	0.2711852891981939
226	0.6590087197977711	0.6234400909941913	2.26695816844396	-11.190651264537856	0.07820678794226645	0.9217932120579684	0.27655956045180097	0.12899468480769818	0.8710053151924244	0.275799808740181
227	0.662962392987998	0.6197911152944824	2.2668476982571084	-11.190459069245957	0.07732474369674674	0.9226752563034835	0.27195857160096526	0.1305929121709407	0.869407087829178	0.2805406093486859
228	0.6668139666343509	0.6161171413833197	2.266752355908781	-11.19029277691955	0.076458583815353	0.9235414161848727	0.2675226484831241	0.13220381644220722	0.8677961835579078	0.2854038592673241
229	0.6705615101859976	0.6124246526486237	2.266678718093618	-11.190164015850618	0.07560948793528688	0.9243905120649346	0.2632501516983453	0.1338235957682599	0.8661764042318524	0.29038572673971114
230	0.6742030814398172	0.6087197947235468	2.2666306569170382	-11.190079736683327	0.07477863569374991	0.9252213643064678	0.2591394418466962	0.13544844829586114	0.8645515517042497	0.295482380009463
231	0.677736732609457	0.6050083665813353	2.266609434862046	-11.190042331541493	0.07396720672794381	0.9260327932722711	0.25518887952824443	0.13707457217177313	0.8629254278283385	0.30068998732019503
232	0.6811605163781617	0.6012958131257589	2.266613813754007	-11.190049783703152	0.07317638067507012	0.9268236193251427	0.25139682534305735	0.13869816554275818	0.8613018344573568	0.3060047169155232
233	0.6844724919312573	0.5975872192117744	2.2666401766404407	-11.190095844978892	0.07240733717233053	0.9275926628278813	0.2477616398912027	0.14031542655557855	0.859684573444543	0.3114227370390631
234	0.687670730963852	0.5938873050274042	2.2666826616930305	-11.190170238223232	0.07166125585692665	0.9283387441432857	0.2442816837727481	0.14192255335699644	0.8580774466431356	0.3169402159344301
235	0.6907533236589938	0.5902004227645081	2.266733307407816	-11.190258882658796	0.07093931636606007	0.9290606836341542	0.24095531758776084	0.1435157440937742	0.8564842559063728	0.32255332184524044
236	0.6937183846312267	0.5865305545032045	2.266782208524286	-11.190344139914673	0.07024269833693243	0.9297573016632855	0.2377809019363087	0.1450911969126741	0.8549088030874931	0.3282582230151094
237	0.6965640588302033	0.5828813112321255	2.266817682202496	-11.190405078867762	0.0695725814067454	0.9304274185934782	0.23475679741845917	0.1466451099604583	0.8533548900397347	0.33405108768765246
238	0.6992885273987409	0.5792559329245132	2.2668264440880206	-11.190417757525339	0.06893014521270054	0.9310698547875308	0.23188136463427972	0.1481736813838892	0.8518263186163361	0.3399280841064859
239	0.7018889762856889	0.5756503556436712	2.2667568498859776	-11.190369624615919	0.06831398283779352	0.9316860171624366	0.22915760130721555	0.1496843817540976	0.8503156182461379	0.3458895876033458
240	0.7043729375194077	0.5720779908946051	2.266703110179379	-11.19033653100977	0.06772471131273633	0.9322752886874899	0.22657225744356918	0.15115961889305185	0.8488403811071845	0.3519224648441307
241	0.7067420140647085	0.5685430094242759	2.2666825423155412	-11.190324617225965	0.0671628443223924	0.9328371556778308	0.22412033970968828	0.15259225247026267	0.8474077475299745	0.35802097863276133
242	0.708996405948342	0.5650458182996806	2.2666876298561673	-11.190329838831598	0.06662820030852808	0.9333717996916929	0.2217997401524964	0.15398024473566424	0.8460197552645736	0.36418191552200085
243	0.711136409942494	0.5615866136939982	2.2667113511457524	-11.190347971420003	0.06612059771290967	0.9338794022873099	0.2196083508189171	0.1553215579391908	0.844678442061048	0.37040206206461257
244	0.7131624173977601	0.558165385214298	2.2667472537278313	-11.190374782022761	0.06563985497730346	0.9343601450229152	0.2175440637558737	0.15661415433077672	0.8433858456694634	0.3766782048133603
245	0.7150749120439185	0.5547819202887564	2.266789525863782	-11.190406190187703	0.06518579054347576	0.9348142094567424	0.2156047710102898	0.1578559961603562	0.8421440038398856	0.3830071303210072
246	0.7168744677611054	0.5514358085858408	2.266833064959373	-11.190438417844794	0.0647582228531929	0.9352417771470249	0.21378836462908885	0.15904504567786348	0.8409549543223808	0.38938562514031644
247	0.7185617463239322	0.5481264464388291	2.2668735427328546	-11.19046812718564	0.06435697034822115	0.9356430296519966	0.2120927366591943	0.1601792651332329	0.8398207348670144	0.39581047582405193
248	0.7201374951210299	0.5448530412500313	2.2669074669909035	-11.190492545887537	0.06398185147032681	0.9360181485298907	0.21051577914752959	0.16125661677639874	0.8387433832238524	0.40227846892497693
249	0.7216025448524588	0.5416146158501625	2.2669322399149703	-11.190509579119285	0.06363268466127624	0.9363673153389409	0.20905538414101832	0.16227506285729518	0.8377249371429609	0.40878639099585445
250	0.7229578072073573	0.5384100127895016	2.266946212800745	-11.190517907874014	0.0633092883628357	0.9366907116373807	0.20770944368658384	0.16323256562585656	0.8367674343744057	0.41533102858944854
251	0.7242042725241578	0.5352378985387319	2.2669487372371027	-11.190517073282894	0.06301148101677148	0.9369885189834438	0.2064758498311497	0.16412708733201714	0.8358729126682525	0.4219091682585223
252	0.7253430074356406	0.5320967675787165	2.2669402127580973	-11.190507546672888	0.06273908106484995	0.9372609189353636	0.20535249462163935	0.16495659022571113	0.8350434097745673	0.4285175965558389
253	0.7263751525010471	0.5289849463599088	2.266922131052003	-11.190490785240286	0.06249190694883734	0.9375080930513736	0.20433727010497627	0.1657190365568729	0.8342809634434158	0.43515310003416224
254	0.7273019198274165	0.5259005971136379	2.2668971168645724	-11.190469273318858	0.0622697771105	0.9377302228897074	0.20342806832808394	0.16641238857543666	0.8335876114248643	0.4418124652462555
255	0.7281245906822655	0.522841721499126	2.266868965789775	-11.190446549325925	0.062072509991604234	0.9379274900085987	0.20262278133788586	0.16703460853133664	0.8329653914689782	0.4484924787448819
256	0.7288445130996714	0.5198061640718176	2.266842679199537	-11.190427218570058	0.06189992403391634	0.9381000759662809	0.20191930118130544	0.1675836586745072	0.8324163413258235	0.4551899270828053
257	0.7294630994817759	0.5167916155604042	2.266824496624616	-11.19041695219952	0.06175183767920261	0.9382481623209875	0.20131551990526622	0.16805750125488259	0.8319424987454662	0.46190159681278886
258	0.729979965287811	0.5137958150363329	2.266806180845605	-11.190406604691258	0.061628264860814304	0.9383717351393681	0.2008114810259927	0.16845597276647134	0.8315440272338962	0.4686234669368645
259	0.7303824205916456	0.5108170702919428	2.266678078202875	-11.190283099660231	0.0615302790009521	0.9384697209992301	0.20042185341499127	0.16879151793673863	0.8312084820636318	0.4753483064693031
260	0.7306910703150168	0.5078494261484848	2.266612140044929	-11.19021927178634	0.06145551236849124	0.9385444876316908	0.20012277742942963	0.1690432324481107	0.8309567675522618	0.48208423389051375
261	0.7309046826915304	0.5048895190866229	2.2665942893311746	-11.190202182343526	0.06140410610625597	0.9385958938939261	0.19991545699112798	0.16921224069668053	0.830787759303693	0.4888286079322208
262	0.7310220732943417	0.5019340632014341	2.2666118878465538	-11.190219936368587	0.06137620135707056	0.9386237986431114	0.19980109602190646	0.169299667078541	0.8307003329218328	0.49557878732614946
263	0.7310421066022742	0.4989798504159485	2.266653727099003	-11.19026176381656	0.061371939263759265	0.9386280607364227	0.1997808984435853	0.16930663598978507	0.8306933640105882	0.5023321308040241
264	0.7309636975608985	0.49602375080791417	2.266710020112769	-11.190318091651353	0.061391460969146334	0.9386085390310357	0.19985606817798462	0.1692342718265057	0.8307657281738667	0.509085997097569
265	0.73078581313749	0.49306271306055516	2.2667723935218884	-11.190380606296195	0.06143490761605604	0.9385650923841261	0.2000278091469247	0.16908369898479572	0.8309163010155753	0.5158377449385094
266	0.7305074738687687	0.4900937650470138	2.266833879434537	-11.190442305904982	0.06150242034731264	0.9384975796528697	0.20029732527222566	0.16885604186074815	0.8311439581396214	0.5225847330585696
267	0.7301277554002931	0.48711401455710596	2.2668889066031683	-11.190497541960655	0.061594140305740376	0.9384058596944422	0.20066582047570766	0.1685524248504559	0.8314475751499119	0.5293243201894741
268	0.7296457900163689	0.4841206501739879	2.266933290498037	-11.190542049759845	0.06171020863416352	0.9382897913660194	0.20113449867919098	0.16817397235001189	0.8318260276503542	0.5360538650629478
269	0.729060768159299	0.4811109423073206	2.266964221943078	-11.190572967403387	0.06185076647540634	0.938149233524777	0.20170456380449572	0.16772180875550902	0.8322781912448554	0.5427707264107154
270	0.7283719399367878	0.47808224438852487	2.2669802540334265	-11.190588842978904	0.06201595497229307	0.9379840450278907	0.20237721977344209	0.16719705846304028	0.8328029415373228	0.549472262964501
271	0.7275786166162818	0.4750319942327568	2.266981287113146	-11.190589629693399	0.06220591526764799	0.9377940847325363	0.2031536705078503	0.16660084586869855	0.8333991541316635	0.5561558334560299
272	0.7266801721050142	0.4719577155712874	2.2669685516499145	-11.190576668789559	0.06242078850429535	0.9375792114958895	0.2040351199295405	0.16593429536857676	0.8340657046317849	0.5628187966170264
273	0.7256760444144899	0.4688570197570456	2.2669445889003246	-11.190552660157511	0.0626607158250594	0.9373392841751261	0.20502277196033286	0.1651985313587679	0.834801468641594	0.5694585111792149
274	0.7245657371081258	0.4657276076451866	2.2669132293148477	-11.190521620633444	0.06292583837276441	0.9370741616274219	0.20611783052204763	0.16439467823536483	0.835605321764998	0.5760723358743205
275	0.7233488207307439	0.46256727164967076	2.266879568685125	-11.19048883005551	0.06321629729023465	0.9367837027099525	0.20732149953650497	0.16352386039446049	0.8364761396059043	0.5826576294340676
276	0.72202493421858	0.4593738979759785	2.2668499420878883	-11.190460765225307	0.06353223372029435	0.9364677662798937	0.208634982925525	0.16258720223214787	0.8374127977682199	0.5892117505901806
277	0.7205937862884555	0.4561454690292591	2.2668318957290197	-11.190445021998064	0.06387378880576779	0.9361262111944212	0.210059484610928	0.1615858281445198	0.838414171855852	0.5957320580743846
278	0.719058562367521	0.4528822807601077	2.266856309241385	-11.190513439107216	0.06423804484106665	0.9357619551591227	0.21159577378885425	0.16052523284757392	0.8394747671527982	0.6022137378969056
279	0.717414885834364	0.4495832491259997	2.2668971490602106	-11.19061848591251	0.06462682770774242	0.9353731722924471	0.2132483299809166	0.15940735445498683	0.8405926455453802	0.608653652647327
280	0.715655987427313	0.44624517053288804	2.2669149848449726	-11.19066338154747	0.06504467613062659	0.9349553238695637	0.21502141417752754	0.1582297619715591	0.8417702380288034	0.6150506337618279
281	0.7137814011929379	0.4428681769947542	2.2669137962479953	-11.190660536005455	0.06549117588232019	0.9345088241178713	0.21691769275036693	0.1569961898753275	0.843003810125031	0.621400423630631
282	0.711790741015095	0.43945273022796383	2.2668978221996845	-11.190622007472822	0.06596591273542424	0.934034087264769	0.21893983207111467	0.1557103726443288	0.8442896273560262	0.6276987646439587
283	0.709683700641043	0.4359996285704646	2.2668714134506596	-11.190559313192924	0.0664684724625398	0.9335315275376554	0.2210904985114509	0.15437604475659955	0.8456239552437522	0.6339413991920341
284	0.7074600536044352	0.4325100135536267	2.266838884273665	-11.190483230086773	0.06699844083626785	0.9330015591639296	0.22337235844305545	0.15299694069017655	0.8470030593101722	0.6401240696650795
285	0.7051196530462944	0.4289853760468908	2.2668043634729713	-11.190403586154396	0.0675554036292095	0.9324445963709904	0.22578807823760844	0.15157679492309642	0.8484232050772491	0.6462425184533183
286	0.7026624314351784	0.42542756189367825	2.266771644896049	-11.190329043803894	0.06813894661396575	0.9318610533862367	0.22834032426678974	0.1501193419333959	0.8498806580669465	0.6522924879469727
287	0.7000884001878201	0.42183877695569805	2.266744037692929	-11.190266876390009	0.0687486555631376	0.9312513444370674	0.23103176290227925	0.14862831619911177	0.8513716838012271	0.6582697205362653
288	0.6973976491916106	0.4182215914818671	2.266724216624411	-11.190222739392624	0.06938411624932614	0.9306158837508812	0.23386506051575717	0.14710745219828056	0.8528925478020544	0.6641699586114194
289	0.6945903462303762	0.4145789437175504	2.2667140727826505	-11.190200437829297	0.07004491444513238	0.9299550855550772	0.23684288347890334	0.14556048440893907	0.8544395155913913	0.6699889445626573
290	0.6916667363149703	0.4109141426696942	2.266714565158197	-11.190201691676204	0.07073063592315733	0.9292693640770542	0.2399678981633976	0.14399114730912402	0.8560088526912012	0.6757224207802017
291	0.6886271409202778	0.4072308699437201	2.26672557356767	-11.19022590127031	0.07144086645600208	0.928559133544211	0.24324277094092023	0.142403175376872	0.8575968246234472	0.6813661296542757
292	0.6854719571303021	0.40353318056871634	2.266745753547191	-11.190269914883078	0.07217519181626761	0.9278248081839465	0.24667016818315102	0.1408003030902198	0.8591996969100925	0.6869158135751018
293	0.6822016566930622	0.39982550272854606	2.2667723939197986	-11.190327800893817	0.07293319777655496	0.9270668022236598	0.25025275626176985	0.13918626492720412	0.8608137350731001	0.6923672149329025
294	0.6788167849871023	0.39611263631796534	2.266801277861183	-11.190390627248881	0.07371447010946522	0.9262855298907494	0.25399320154845695	0.13756479536586158	0.8624352046344334	0.697716076117901
295	0.6753179599014691	0.3923997502447245	2.266826548418191	-11.190446251171329	0.07451859458759937	0.9254814054126145	0.25789417041489215	0.13593962888422892	0.8640603711160553	0.7029581395203197
296	0.6717062368239588	0.3886921429511112	2.266843797803669	-11.19048418734683	0.07534503792210251	0.9246549620781098	0.26195795504795233	0.1343143322162836	0.8656856677839885	0.7080893967968546
297	0.6680112562482139	0.38497741804721475	2.2670990817857994	-11.190890439657506	0.07618341641654452	0.9238165835836719	0.26615801160936625	0.1326800244161999	0.8673199755840694	0.7131248188759357
298	0.6641935310147283	0.38128936256400137	2.267224465300216	-11.19108871559649	0.07704552820621084	0.922954471794009	0.2705390384212408	0.1310604354146461	0.8689395645856202	0.7180314705202568
299	0.6602597239779906	0.37763264861891765	2.2672516972186028	-11.191130769860752	0.07792854426714488	0.9220714557330781	0.2750984572432117	0.1294579679465667	0.8705420320536963	0.722807913088971
300	0.6562163421311568	0.3740121279905968	2.2672090438755372	-11.191062468447415	0.07882963557539015	0.9211703644248356	0.2798336898349152	0.12787502474690607	0.8721249752533535	0.7274527079412314
301	0.6520697180119248	0.370432823378272	2.2671212216459278	-11.190923676665022	0.07974597310699005	0.9202540268932381	0.28474215795598695	0.1263140085506087	0.8736859914496472	0.731964416436191
302	0.6478259920704861	0.36689991900247737	2.2670093624600964	-11.190748215849059	0.08067472783798801	0.9193252721622424	0.2898212833660628	0.12477732209261912	0.875222677907633	0.7363415999330027
303	0.6434910959854332	0.3634187505375041	2.2668910101706192	-11.190563884998667	0.08161307074442756	0.9183869292558048	0.2950684878247788	0.12326736810788164	0.8767326318923665	0.74058281979082
304	0.6390707369098944	0.3599947943681345	2.2667801458941543	-11.19039254375473	0.08255817280235207	0.9174418271978821	0.30048119309177085	0.1217865493313408	0.8782134506689033	0.7446866373687957
305	0.6345703826267028	0.3566336561652947	2.266687240695293	-11.190250253400963	0.08350720498780498	0.9164927950124311	0.3060568209266746	0.12033726849794107	0.8796627315022989	0.7486516140260826
306	0.6299952475880777	0.35334105877743993	2.2666193342420824	-11.190147472861295	0.08445733827682979	0.915542661723408	0.3117927930891262	0.11892192834262683	0.881078071657609	0.7524763111218343
307	0.6253502798121136	0.35012282943671474	2.266580138330748	-11.190089306963284	0.08540574364546992	0.9145942563547697	0.3176865313387615	0.11754293160034256	0.8824570683998891	0.7561592900152035
308	0.6206401486053181	0.346984886281211	2.266570164437166	-11.190075804516537	0.08634959206976879	0.9136504079304727	0.3237354574352162	0.11620268100603277	0.8837973189941948	0.7596991120653434
309	0.6158692330775317	0.3439332241969897	2.266586874693936	-11.190102303997936	0.08728605452576989	0.9127139454744737	0.32993699313812647	0.11490357929464182	0.8850964207055817	0.7630943386314071
310	0.6110416114127888	0.3409738999859285	2.266624855904481	-11.19015982482623	0.08821230198951666	0.9117876980107292	0.33628856020712805	0.11364802920111422	0.8863519707991053	0.7663435310725476
311	0.6061610508570503	0.33811301686790357	2.2666760163809334	-11.190235502335263	0.08912550543705249	0.9108744945631959	0.34278758040185664	0.11243843346039444	0.8875615665398213	0.7694452507479178
312	0.6012309983812373	0.33535670832832615	2.2667298055233633	-11.190313064608562	0.09002283584442089	0.9099771641558303	0.3494314754819486	0.11127719480742684	0.8887228051927851	0.772398059016671
313	0.5962545719756445	0.3327111213246167	2.266773456138181	-11.190373349313276	0.09090146418766529	0.9090985358125891	0.3562176672070395	0.11016671597715597	0.8898332840230525	0.7752005172379604
314	0.591234552529593	0.3301823988678143	2.266792249518759	-11.190394858567203	0.09175856144282911	0.9082414385574291	0.36314357733676506	0.10910939970452627	0.8908906002956789	0.7778511867709386
315	0.5861775316660176	0.32777167594100093	2.2667215671518184	-11.190251226442811	0.09260100654669234	0.9073989934535688	0.37019418269045823	0.10810320853017973	0.8918967914700224	0.7803503925263052
316	0.5810893139515232	0.32548333113130007	2.2666478483690637	-11.190102462773584	0.09341539537622778	0.9065846046240357	0.37736857502116955	0.10715113015382871	0.8928488698463709	0.7827000642314871
317	0.5759719382223435	0.32332347324812905	2.2666194395450594	-11.19004519437842	0.09419082681174887	0.9058091731885168	0.3846680871058766	0.106256748801751	0.8937432511984464	0.7849001091468439
318	0.5708291968184283	0.3212947980283902	2.2666265660460967	-11.190059999444465	0.09492576503516229	0.9050742349651058	0.3920846844854521	0.10542027501973568	0.8945797249804598	0.7869509532400164
319	0.5656645828749349	0.3193998332626724	2.266659761551172	-11.190127850378222	0.09561867422837467	0.9043813257718957	0.399610332700768	0.10464191935357195	0.8953580806466219	0.7888530224786447
320	0.5604812969985832	0.31764093577683755	2.2667100501484416	-11.190230551713626	0.09626801857329266	0.9037319814269799	0.4072369972926965	0.10392189234904896	0.8960781076511435	0.7906067428303694
321	0.555282254405339	0.3160202885850027	2.2667691283605373	-11.19035117279957	0.09687226225182285	0.9031277377484518	0.4149566438021094	0.1032604045519559	0.8967395954482353	0.7922125402628303
322	0.550070092500709	0.3145398982157942	2.2668295457249403	-11.190474470754395	0.097429869445872	0.9025701305544047	0.42276123776987984	0.10265766650808182	0.8973423334921082	0.7936708407436684
323	0.5448471788858054	0.3132015922137457	2.266884882640258	-11.190587299460962	0.09793930433734667	0.9020606956629318	0.4306427447368796	0.10211388876321596	0.8978861112369732	0.7949820702405238
324	0.5396156197743336	0.31200701681769577	2.2669299242843888	-11.190679000693532	0.09839903110815355	0.9016009688921266	0.43859313024398083	0.10162928186314746	0.8983707181370408	0.7961466547210367
325	0.5343772688077969	0.3109576348180395	2.2669608295193333	-11.190741773823396	0.09880751394019927	0.9011924860600823	0.4466043598320557	0.10120405635366544	0.898795943646522	0.7971650201528478
326	0.5291337362584583	0.3100547235946748	2.266975293822502	-11.190771020949288	0.09916321701539046	0.9008367829848922	0.4546683990419766	0.1008384227805591	0.8991615772196276	0.7980375925035973
327	0.5238863986119916	0.3092993733374761	2.2669727054283157	-11.19076566474566	0.09946460451563378	0.9005353954846497	0.46277721341461503	0.1005325916896176	0.8994674083105684	0.7987647977409253
328	0.5186364085242572	0.3086924854511183	2.266954294028695	-11.190728436818475	0.09971014062283591	0.9002898593774481	0.4709227684908444	0.10028677362663004	0.8997132263735551	0.7993470618324727
329	0.5133847051492865	0.30823477114606734	2.2669232715685927	-11.190666134905495	0.09989828951890345	0.9001017104813807	0.47909702981153635	0.1001011791373856	0.8998988208627987	0.7997848107458795
330	0.5081320248383147	0.3079267502175377	2.266884964884227	-11.19058984785448	0.10002751538574307	0.8999724846145407	0.48729196291756305	0.09997601876767345	0.9000239812325099	0.800078470448786
331	0.5028789122126024	0.3077687500142153	2.2668469401681834	-11.190515147955807	0.10009628240526142	0.8999037175950216	0.4954995333497968	0.09991150306328273	0.9000884969368995	0.8002284669088329
332	0.4976257316158044	0.30776090459852834	2.2668191195080656	-11.19046225089204	0.10010305475936512	0.8998969452409167	0.5037117066491097	0.09990784257000258	0.9000921574301785	0.8002352260936602
333	0.49237133376978737	0.3079025640088028	2.2667997535945004	-11.190421872287203	0.10004864724812358	0.8999513527521564	0.5119226908388484	0.09996443991425638	0.9000355600859233	0.8000988836541834
334	0.4871124041667403	0.308192174746272	2.2667386384440595	-11.19027356278654	0.09994121346571291	0.9000587865345656	0.5201309509104641	0.10007877439363408	0.8999212256065453	0.7998178051597581
335	0.4818585459682281	0.30863366704047973	2.2667136309754934	-11.190211872644884	0.0997674788831012	0.9002325211171761	0.5283130953944429	0.10025598590799188	0.8997440140921875	0.7993929745434288
336	0.4766093980180426	0.3092261769455792	2.2667126949547383	-11.190209613541104	0.09953006088814559	0.9004699391121308	0.5364620904573225	0.10049548579196231	0.8995045142082175	0.7988239551231763
337	0.4713649194788073	0.30996864501219057	2.2667262343584484	-11.190244494197794	0.09923157686870328	0.9007684231315723	0.5445709022656406	0.10079668538017793	0.8992033146200026	0.7981103102169811
338	0.4661253983961241	0.3108598197776202	2.2667468621582687	-11.190298787648908	0.09887464421263142	0.9011253557876435	0.5526324969859352	0.10115899600727131	0.8988410039929102	0.797251603142824
339	0.4608914597814605	0.31189826144370786	2.266769165861561	-11.190358973627134	0.09846188030778726	0.901538119692487	0.560639840784743	0.10158182900787494	0.8984181709923078	0.7962473972186856
340	0.4556640731862175	0.3130823457349422	2.2667894695016226	-11.19041535577837	0.09799590254202786	0.9020040974582455	0.5685858998286032	0.10206459571662144	0.8979354042835626	0.7950972557625468
341	0.4504445597353323	0.3144102679295233	2.2668055920547854	-11.190461654137234	0.09747932830321045	0.9025206716970617	0.5764636402840528	0.10260670746814335	0.897393292532042	0.7938007420923879
342	0.4452345985849824	0.31588004705610084	2.266816602501005	-11.19049457394878	0.09691477497919221	0.9030852250210786	0.5842660283176296	0.1032075755970732	0.8967924244031137	0.79235741952619
343	0.4400362327655234	0.31748953024895354	2.2668225719439814	-11.190513352500318	0.0963048599578303	0.9036951400424387	0.5919860300958713	0.10386661143804356	0.8961333885621448	0.7907668513819335
344	0.4348518743676611	0.3192363972544252	2.266824323372016	-11.19051928613734	0.0956522006269819	0.9043477993732847	0.5996166117853156	0.10458322632568696	0.8954167736745027	0.7890286009775992
345	0.42968430902705734	0.32111816508147834	2.266823179776967	-11.190515240084297	0.09495941437450423	0.9050405856257594	0.6071507395524997	0.10535683159463592	0.8946431684055549	0.7871422316311679
346	0.4245366996600938	0.3231321927892725	2.2668207114616514	-11.190505144080358	0.09422911858825438	0.9057708814120055	0.6145813795639623	0.10618683857952307	0.8938131614206688	0.78510730666062
347	0.4194125894013677	0.32527568640472326	2.2668184834609164	-11.19049347718087	0.09346393065608954	0.9065360693441658	0.6219014979862408	0.10707265861498094	0.8929273413852117	0.7829233893839365
348	0.41431590369165516	0.32754570396304794	2.2668178040843623	-11.190484745375251	0.09266646796586692	0.9073335320343829	0.6291040609858727	0.10801370303564206	0.891986296964551	0.7805900431190977
349	0.40925095146358037	0.3299391606643535	2.266819475664451	-11.190482955942258	0.09183934790544368	0.9081606520947997	0.6361820347293958	0.109009383176139	0.8909906168240542	0.7781068311840847
350	0.4042224253710456	0.33245283413937404	2.2668235486678254	-11.190491092713625	0.09098518786267698	0.9090148121375587	0.643128385383348	0.11005911037110429	0.8899408896290887	0.775473316896878
351	0.3992149985118281	0.33506869555597646	2.2670033256366438	-11.190770145403704	0.090099795890304	0.9099002041099286	0.6499614551981825	0.11115320479155448	0.8888467952086399	0.7727005755932284
352	0.394260376010576	0.33780221528909865	2.2671075027169616	-11.190932380273889	0.08919784516601265	0.9108021548342176	0.6566434877653727	0.11230175442512888	0.8876982455750675	0.7697722384657071
353	0.38936429607817363	0.34064856839611374	2.267128315500856	-11.190965103514904	0.08828308058333698	0.9117169194168907	0.6631690867728369	0.11350329643973484	0.8864967035604638	0.7666885621280751
354	0.38452903314811004	0.343600228132061	2.267089298039937	-11.190903852449168	0.08735782119455207	0.9126421788056731	0.6695374220316408	0.11475474280539325	0.885245257194808	0.7634520136526635
355	0.37975711240308324	0.34664973020243256	2.2670116344841746	-11.190781156801446	0.08642438605193299	0.9135756139482895	0.67574766335285	0.11605300549212497	0.883946994508079	0.7600650601118032
356	0.3750513007593193	0.3497896948660297	2.2669139290705367	-11.190626032398267	0.08548509420775482	0.9145149057924649	0.6817989805475302	0.1173949964699509	0.8826050035302561	0.7565301685778253
357	0.3704145975517543	0.3530128479022445	2.2668120060089745	-11.190463528076268	0.08454226471429271	0.9154577352859242	0.6876905434267468	0.11877762770889183	0.8812223722913182	0.752849806123061
358	0.3658502248950712	0.3563120404326074	2.266718738154167	-11.190314325613635	0.08359821662382162	0.9164017833763924	0.6934215218015665	0.12019781117896883	0.8798021888212442	0.7490264398198407
359	0.3613616176974533	0.3596802675910839	2.2666439033451464	-11.190194392262551	0.08265526898861666	0.9173447310115944	0.6989910854830543	0.1216524588502027	0.8783475411500133	0.745062536740496
360	0.35695241330580163	0.363110686042112	2.266594067355655	-11.190114685332949	0.08171574086095296	0.9182842591392552	0.7043984042822762	0.1231384826926143	0.8768615173076048	0.7409605639573578
361	0.3526264407630952	0.36659663034969375	2.266572492516292	-11.19008090824909	0.08078195129310553	0.9192180487070994	0.7096426480102977	0.12465279467622455	0.8753472053239973	0.736722988542757
362	0.34838770966052307	0.37013162820504203	2.26657907123474	-11.190093317559153	0.07985621933734957	0.9201437806628523	0.7147229864781844	0.1261923067710542	0.8738076932291703	0.732352277569025
363	0.34424039856900107	0.3737094145243019	2.266610283842194	-11.190146580509133	0.07894086404596	0.9210591359542386	0.7196385894970027	0.12775393094712434	0.8722460690531025	0.7278508981084922
364	0.34018884303670466	0.3773239444317228	2.2666591804216774	-11.190229682980252	0.07803820447121199	0.9219617955289834	0.7243886268778177	0.1293345791744558	0.8706654208257731	0.72322131723349
365	0.33623752314128413	0.38096940514737154	2.2667153865164567	-11.190325887815995	0.07715055966538058	0.9228494403348114	0.7289722684316954	0.13093116342306937	0.8690688365771613	0.7184660020163494
366	0.332391050587514	0.38464022680201115	2.2667651328630534	-11.190412743812288	0.07628024868074088	0.9237197513194478	0.7333886839697014	0.132540595662986	0.8674594043372459	0.7135874195294013
367	0.328654155343222	0.3883310922051667	2.2667913095325707	-11.190462145892722	0.07542959056956795	0.9245704094306173	0.7376370433029015	0.1341597878642266	0.8658402121360061	0.7085880368449768
368	0.32502423559522153	0.3920389394631012	2.2668200293444762	-11.190541782856295	0.07459620845422996	0.9254037915459524	0.7417214525781878	0.1357883786682296	0.8642116213320054	0.70346960985211
369	0.32150571937494665	0.3957536247168251	2.2668482015171367	-11.190617331106914	0.07378418655177474	0.9262158134484053	0.7456434542430382	0.13741803493440977	0.8625819650658286	0.6982387612117564
370	0.3181039028807864	0.39946746397765753	2.266857127287678	-11.190641371442155	0.07299715430801285	0.9270028456921651	0.7494031019372658	0.13904242106988876	0.8609575789303531	0.6929009279429944
371	0.31481913954112706	0.40317553102915094	2.266853381871753	-11.190630243424263	0.07223524154307906	0.9277647584570967	0.7530032511520283	0.14065807331048447	0.8593419266897608	0.6874603175610247
372	0.31165168547629873	0.4068732493423156	2.2668422200706475	-11.190597456189028	0.07149857807710815	0.9285014219230656	0.7564467573784837	0.1422615278920148	0.857738472108234	0.6819211375810479
373	0.3086017001123753	0.41055639422859375	2.2668277040975857	-11.19055389460533	0.07078729373023489	0.929212706269937	0.7597364761077899	0.14384932105029766	0.8561506789499544	0.6762875955182649
374	0.3056692468690252	0.41422109386787176	2.266812833889354	-11.190508033543846	0.07010151832259412	0.929898481677576	0.7628752628311047	0.14541798902115083	0.8545820109791047	0.6705638988878768
375	0.302854293921004	0.4178638292819593	2.266799678960677	-11.190466157129796	0.06944138167432051	0.930558618325848	0.7658659730395865	0.1469640680403924	0.8530359319598666	0.6647542552050835
376	0.3001567150328488	0.42148143332547117	2.26678951097652	-11.190432580145618	0.06880701360554892	0.9311929863946179	0.7687114622243929	0.1484840943438402	0.8515159056564221	0.6588628719850862
377	0.2975762904662907	0.425071088767232	2.2667829363251917	-11.19040986902484	0.0681985439364141	0.9318014560637511	0.7714145858766821	0.14997460416731206	0.8500253958329534	0.6528939567430856
378	0.29511270795987204	0.4286303255361493	2.266780028073688	-11.190399060137487	0.06761610248705084	0.9323838975131128	0.7739781994876117	0.15143213374662595	0.8485678662536429	0.6468517169942825
379	0.2927655637802113	0.43215701720600164	2.266780456777135	-11.190399873310543	0.06705981907759391	0.9329401809225683	0.7764051585483399	0.15285321931759974	0.8471467806826722	0.6407403602538775
380	0.2905343638443269	0.4356493767937418	2.266783619697577	-11.190410918755207	0.06652982352817816	0.9334701764719825	0.7786983185500244	0.15423439711605122	0.8457656028842239	0.634564094037072
381	0.28841852491238607	0.43910595194573854	2.266788768064832	-11.190429895786577	0.06602624565893825	0.933973754341221	0.7808605349838235	0.15557220337779848	0.8444277966224796	0.6283271258590657
382	0.28641737585021615	0.4425256195858459	2.2667951320848267	-11.190453781922322	0.06554921529000902	0.9344507847101488	0.7828946633408949	0.15686317433865932	0.8431368256616216	0.6220336632350597
383	0.28453015896086653	0.44590758009834425	2.266802043469843	-11.190479011135645	0.06509886224152528	0.934901137758631	0.7848035591123965	0.15810384623445164	0.841896153765832	0.615687913680255
384	0.2827560313844778	0.4492513511175835	2.2668090553314926	-11.190501640215643	0.06467531633362175	0.935324683666533	0.7865900777894865	0.15929075530099335	0.8407092446992931	0.6092940847098521
385	0.2811000021218546	0.45255946044707956	2.266761823432687	-11.19046155195593	0.06427938869017655	0.9357206113099766	0.7882501603040545	0.16042669207600482	0.8395733079242839	0.6028543201196299
386	0.27956251038342417	0.45583297589892513	2.266647777431789	-11.190347280928354	0.06391082550105145	0.9360891744991005	0.7897843006967661	0.16151105789378414	0.8384889421065063	0.5963716236166994
387	0.2781285693579556	0.45906709221524167	2.2665926992968357	-11.19029171057109	0.06356758676235394	0.9364324132377968	0.7912107462586064	0.16252751663425263	0.8374724833660399	0.589853680513397
388	0.2767983841875895	0.4622641764145083	2.2665832503610153	-11.190282124212779	0.06324957937316329	0.9367504206269864	0.792530180467027	0.16347544351104226	0.8365245564892525	0.5833029383298404
389	0.27557209544008887	0.46542665293346985	2.2666073540021587	-11.190306741945857	0.06295671023255878	0.9370432897675901	0.7937432867994795	0.16435421373778514	0.8356457862625118	0.5767218445861463
390	0.274449779794269	0.468557001752041	2.266654214426694	-11.190354824118561	0.06268888623961963	0.9373111137605284	0.7948507487334158	0.16516320252811337	0.834836797472186	0.5701128468024317
391	0.27343145075036146	0.47165775668750304	2.266714335214009	-11.190416765384759	0.06244601429342513	0.9375539857067224	0.7958532497462875	0.16590178509565903	0.8340982149046425	0.5634783924988136
392	0.2725170593645083	0.474731503853137	2.2667795372630506	-11.190484178882608	0.062228001293054544	0.9377719987070927	0.7967514733155463	0.1665693366540542	0.8334306633462494	0.5568209291954094
393	0.27170649500659216	0.47778088027598464	2.2668429758307633	-11.190549970156335	0.062034754137587085	0.93796524586256	0.7975461029186439	0.16716523241693104	0.8328347675833743	0.550142904412335
394	0.27099958614061415	0.4808085726679644	2.2668991564009806	-11.190608400485601	0.06186617972610203	0.9381338202740451	0.7982378220330323	0.16768884759792158	0.8323111524023852	0.5434467656697081
395	0.27039610112684653	0.4838173163441104	2.2669439491728482	-11.190655139343384	0.06172218495767865	0.9382778150424688	0.7988273141361629	0.16813955741065795	0.8318604425896498	0.5367349604876452
396	0.2698957490449886	0.48680989428122257	2.2669746020098893	-11.190687305765046	0.06160267673139619	0.9383973232687518	0.7993152627054876	0.1685167370687722	0.8314832629315358	0.5300099363862636
397	0.26949818053757	0.4897891363097398	2.266989751744081	-11.19070349847766	0.06150756194633391	0.9384924380538148	0.7997023512184579	0.16881976178589647	0.8311802382144113	0.52327414088568
398	0.26920298867284975	0.49275791843116323	2.2669894337841336	-11.19070381470798	0.06143674750157107	0.9385632524985786	0.7999892631525258	0.16904800677566284	0.830951993224644	0.5165300215060121
399	0.26900970982647276	0.4957191622528626	2.266975090032836	-11.190689857659144	0.06139014029618691	0.938609859703964	0.8001766819851429	0.16920084725170337	0.8307991527486016	0.5097800257673757
400	0.26891782458114966	0.498675834531599	2.2669495751752464	-11.190664732718385	0.06136764722926071	0.9386323527708917	0.8002652911937609	0.1692776584276502	0.830722341572652	0.5030266011898883
401	0.26892675864363735	0.5016309468165979	2.2669171614568944	-11.190633032529595	0.061369175199871714	0.9386308248002825	0.8002557742558315	0.1692778155171354	0.8307221844831632	0.4962721952936667
402	0.26903588377830856	0.5045875551824874	2.266883542129354	-11.190600811134228	0.06139463110709918	0.9386053688930571	0.8001488146488064	0.16920069373379104	0.8307993062665027	0.489519255598828
403	0.26924451875660205	0.5075487600419044	2.266855833799074	-11.190575547450399	0.06144392185002237	0.9385560781501362	0.7999450958501375	0.16904566829124926	0.8309543317090384	0.48277022962548904
404	0.2695519303216588	0.5105177060270446	2.2668425779743444	-11.190566098421769	0.06151695432772053	0.9384830456724408	0.7996453013372763	0.16881211440314217	0.8311878855971383	0.4760275648937673
405	0.2699647111641793	0.5134915781611677	2.266773412267062	-11.190526008412625	0.0616132869705563	0.9383867130296059	0.7992400425242189	0.1685132416397709	0.831486758360506	0.4693048052580532
406	0.2704789077962111	0.516478072705153	2.266696135829574	-11.190478764467887	0.06173379328465133	0.9382662067155104	0.7987353665727008	0.1681398089291954	0.831860191071081	0.4625944447682049
407	0.271090709245279	0.5194846876562125	2.2666602146417967	-11.19045697421089	0.061879026634159125	0.9381209733660026	0.7981366318004192	0.16768351181082988	0.8323164881894457	0.4558907495813344
408	0.27180184218060466	0.5225139237189687	2.266655530501173	-11.190454175092276	0.0620491144274304	0.9379508855727315	0.7974413373592549	0.16714701143847116	0.8328529885618035	0.44919736043424685
409	0.27261397186667224	0.5255680900075129	2.2666732296895944	-11.190464671040921	0.062244184072815865	0.9377558159273466	0.7966469824010898	0.16653296896591593	0.8334670310343574	0.44251791806374735
410	0.27352869962700443	0.5286492997311342	2.266705673714065	-11.190483556200167	0.06246436297866623	0.9375356370214968	0.795751066077805	0.16584404554696097	0.8341559544533109	0.4358560632066414
411	0.27454756031520955	0.5317594656653053	2.26674638873292	-11.190506724920402	0.06270977855333222	0.9372902214468317	0.7947510875412819	0.1650829023354029	0.8349170976648673	0.4292154365997332
412	0.2756720197952318	0.5349002954286397	2.266790013102143	-11.190530867514337	0.06298055820516457	0.9370194417950003	0.7936445459434017	0.1642522004850385	0.8357477995152298	0.42259967897982836
413	0.27690347243277535	0.5380732865895048	2.266832242553366	-11.190553451366664	0.06327682934251395	0.9367231706576521	0.7924289404360461	0.1633546011496645	0.8366453988506019	0.4160124310837319
414	0.2782432385999172	0.5412797216287719	2.266869772588488	-11.190572687084817	0.06359871937373111	0.9364012806264362	0.7911017701710963	0.16239276548307763	0.8376072345171865	0.40945733364824904
415	0.279692562194957	0.5445206627878109	2.2669002377459755	-11.190587479481001	0.06394635570716674	0.936053644293002	0.7896605343004337	0.16136935463907465	0.8386306453611873	0.40293802741018525
416	0.2812526081795982	0.5477969468332873	2.2669221474610577	-11.190597363287091	0.06431986575117159	0.9356801342489985	0.7881027319759395	0.16028702977145218	0.8397129702288073	0.3964581531063447
417	0.2829244601355926	0.5511091797725977	2.2669348183063738	-11.190602423622192	0.06471937691409634	0.9352806230860752	0.7864258623494953	0.159148452034007	0.84085154796625	0.39002135147353295
418	0.28470911784302266	0.5544577315558858	2.266938302461318	-11.190603201356868	0.06514501660429173	0.9348549833958814	0.7846274245729823	0.15795628258053585	0.8420437174197185	0.3836312632485552
419	0.2866074948824352	0.5578427308025117	2.2669333123171924	-11.190600583647168	0.06559691223010845	0.9344030877700661	0.782704917798282	0.15671318256483543	0.8432868174354162	0.3772915291682164
420	0.28862041626308443	0.5612640595916047	2.2669211411816734	-11.190595680045003	0.06607519119989724	0.9339248088002787	0.7806558411772757	0.15542181314070247	0.8445781868595464	0.37100578996932176
421	0.29074861607958086	0.5647213483579177	2.2669035800995863	-11.190589684728335	0.06657998092200877	0.9334200190781686	0.7784776938618448	0.15408483546193383	0.8459151645383123	0.3647776863886768
422	0.29299273519928715	0.5682139709356103	2.266882830858073	-11.190583725534665	0.06711140880479383	0.9328885911953848	0.7761679750038707	0.152704910682326	0.8472950893179173	0.35861085916308577
423	0.2953533189828425	0.5717410397938272	2.266861415292759	-11.19057870062423	0.06766960225660308	0.9323303977435768	0.7737241837552346	0.1512846999556758	0.8487153000445646	0.3525089490293541
424	0.29783081504024084	0.5753014015090051	2.266842081057792	-11.190575103745138	0.06825468868578725	0.9317453113143938	0.7711438192678178	0.14982686443577997	0.8501731355644577	0.34647559672428696
425	0.3004255710249308	0.578893632519732	2.2668277040669134	-11.190572839221806	0.06886679550069706	0.9311332044994848	0.768424380693502	0.14833406527643525	0.8516659347237996	0.3405144429846895
426	0.3031114242660721	0.582526510212778	2.2670559204683913	-11.190962690979152	0.06949445685898759	0.9305055431411956	0.7655846867094266	0.14680223994866098	0.8531977600515709	0.3346144324701044
427	0.30591144145618593	0.5861877684529999	2.2673257377125653	-11.191416306820166	0.07014654312029846	0.9298534568798866	0.7626026449000297	0.14524206676296122	0.8547579332372675	0.3287930412514006
428	0.3088457619044504	0.5898649843817376	2.2674550081316385	-11.191633257087599	0.07083136938874561	0.9291686306114415	0.7594585574286398	0.14366339138466444	0.856336608615561	0.3230666798334161
429	0.3119104161378094	0.5935549817271629	2.2674730465049997	-11.19166329913362	0.07154698386473106	0.928453016135458	0.7561523505024587	0.14206958644074652	0.8579304135594759	0.317438278430888
430	0.3151014335111139	0.5972542595432189	2.267407134066926	-11.191552655818953	0.07229143474865686	0.9277085652515344	0.7526839503286881	0.14046402455818333	0.859535975442036	0.311910767258553
431	0.31841485463451874	0.6009589941991204	2.267282301267209	-11.191343642329187	0.07306277024092506	0.9269372297592685	0.7490532831145297	0.13885007836395064	0.8611499216362656	0.3064870765311476
432	0.32184674357983745	0.6046650422241359	2.2671211330281658	-11.191074334133194	0.07385903854193769	0.9261409614582581	0.7452602750671853	0.13723112048502428	0.8627688795151889	0.30117013646340834
433	0.3253931998583626	0.6083679440661585	2.266943595995519	-11.190778276252773	0.07467828785209675	0.9253217121481014	0.7413048523938567	0.13561052354838019	0.86438947645183	0.2959628772700723
434	0.3290503701640271	0.6120629288203012	2.2667668872506015	-11.190484233905796	0.07551856637180443	0.9244814336283962	0.7371869413017451	0.13399166018099393	0.8660083398192132	0.2908682291658753
435	0.3328144598771467	0.6157449199812493	2.2666053039805174	-11.190215984567931	0.07637792230146269	0.9236220776987404	0.7329064679980526	0.1323779030098414	0.8676220969903629	0.2858891223655543
436	0.3366817443253641	0.6194085422703868	2.2664701336848445	-11.189992151560036	0.0772544038414736	0.9227455961587321	0.7284633586899807	0.13077262466189846	0.8692273753383029	0.2810284870838459
437	0.340648579799778	0.6230481295857642	2.2663695646253617	-11.189826079397308	0.0781460591922392	0.921853940807969	0.7238575395847311	0.1291791977641409	0.8708208022360575	0.2762892535354867
438	0.3447114143256215	0.6266577341198021	2.2663086163915525	-11.18972575131874	0.07905093655416155	0.9209490634460493	0.7190889368895056	0.12760099494354454	0.8723990050566509	0.2716743519352133
439	0.3488667981882299	0.6302311366862405	2.2662890906517115	-11.189693749637364	0.07996708412764263	0.9200329158725709	0.7141574768115061	0.12604138882708527	0.8739586111731074	0.2671867124977626
440	0.353111394216416	0.6337618582942147	2.266309542379033	-11.189727259797724	0.08089255011308462	0.9191074498871316	0.7090630855579337	0.12450375204173873	0.875496247958451	0.2628292654378706
441	0.3574419878267492	0.6372431730035024	2.2663652720758405	-11.189818119281444	0.0818253827108895	0.9181746172893293	0.7038056893359905	0.1229914572144808	0.8770085427857062	0.2586049409702742
442	0.361855496833624	0.6406681220909247	2.2664483397581137	-11.189952912748224	0.08276363012145932	0.9172363698787622	0.698385214352878	0.12150787697228732	0.8784921230278969	0.25451666930970995
443	0.3663489810313802	0.6440295295535836	2.266547601697572	-11.190113115021363	0.08370534054519614	0.9162946594550281	0.6928015868157981	0.12005638394213407	0.8799436160580475	0.25056738067091455
444	0.370919651556127	0.6473200189701145	2.26664877113973	-11.190275283706917	0.08464856218250202	0.9153514378177249	0.6870547329319523	0.11864035075099688	0.881359649249182	0.24676000526862446
445	0.3755648800363122	0.6505320317363883	2.266734504413538	-11.190411303356694	0.08559134323377891	0.9144086567664507	0.6811445789085427	0.11726315002585166	0.8827368499743244	0.24309747331757667
446	0.3802822075424656	0.6536578466871403	2.2667845140101432	-11.190488683130695	0.08653173189942902	0.9134682681008032	0.6750710509527703	0.11592815439367404	0.8840718456064995	0.23958271503250717
447	0.3850627673641124	0.6566963095041648	2.266809858509129	-11.190515042497518	0.0874693716068407	0.9125306283933955	0.6688450559532069	0.11463413075173409	0.8853658692484369	0.2362136727242203
448	0.3899022954473566	0.6596390869825131	2.266828987878373	-11.190532269609964	0.08839725071317871	0.9116027492870614	0.6624657198436898	0.11338564349599632	0.8866143565041724	0.2329926048983814
449	0.39479913731293376	0.6624767354671117	2.2668330660529605	-11.190535449281098	0.08931006857180188	0.9106899314284411	0.6559305455864356	0.11218748882269958	0.8878125111774674	0.22992302429570038
450	0.3997472021440637	0.6652054258293244	2.2668287512488696	-11.190533007256766	0.09020496098144083	0.9097950390188041	0.6492461433421781	0.11104043105362822	0.8889595689465372	0.22700455864773264
451	0.4047407863360975	0.6678214316675714	2.2668208663774534	-11.190530288899254	0.0910790637408261	0.9089209362594203	0.6424191232716517	0.10994523451056672	0.8900547654895974	0.22423683568603378
452	0.4097745788782555	0.6703211358461073	2.2668126309272463	-11.190530053554731	0.09192951264868844	0.908070487351559	0.6354560955355897	0.1089026635152993	0.8910973364848637	0.22161948314215876
453	0.4148436654964225	0.6727010369885693	2.2668059028171195	-11.190532988847405	0.09275344350375839	0.9072465564964903	0.6283636702947263	0.1079134823896104	0.8920865176105514	0.21915212874766318
454	0.4199435316189597	0.6749577559176125	2.266801428735328	-11.190538239917283	0.09354799210476657	0.9064520078954836	0.6211484577097957	0.10697845545528442	0.8930215445448761	0.21683440023410241
455	0.4250700642279711	0.6770880420318067	2.2667991015983757	-11.19054394888525	0.09431029425044359	0.9056897057498088	0.6138170679415318	0.10609834703410574	0.8939016529660536	0.21466592533303183
456	0.43021955265859946	0.6790887796108526	2.266798223864919	-11.190547800077068	0.09503748573952006	0.9049625142607353	0.6063761111506686	0.10527392144785873	0.8947260785522991	0.21264633177600686
457	0.43538868840868605	0.680956994040039	2.266797775526948	-11.190547566775788	0.09572670237072654	0.904273297629533	0.5988321974979407	0.10450594301832782	0.8954940569818283	0.21077524729458297
458	0.4405745640205355	0.6826898579447447	2.2667966856773782	-11.190541655509424	0.09637507994279375	0.9036249200574715	0.5911919371440811	0.10379517606729727	0.8962048239328567	0.2090522996203153
459	0.4457746710955499	0.6842846972256584	2.2667941066254604	-11.190529644129235	0.09697975425445225	0.9030202457458204	0.5834619402498242	0.10314238491655152	0.8968576150836	0.20747711648475933
460	0.45098689750118254	0.685738996985275	2.266789689604452	-11.190512810204805	0.09753786110443266	0.9024621388958495	0.5756488169759041	0.10254833388787496	0.8974516661122734	0.20604932561947048
461	0.45620952382795577	0.6870504073360968	2.2667838611963687	-11.190494646567267	0.09804653629146556	0.9019534637088285	0.5677591774830547	0.10201378730305195	0.8979862126970929	0.20476855475600414
462	0.4614412191522359	0.688216749080858	2.266778099692604	-11.190481361182318	0.09850291561428158	0.9014970843860269	0.5597996319320107	0.10153950948386692	0.8984604905162736	0.20363443162591577
463	0.46668300023488474	0.6892353178882811	2.2665832425341597	-11.190101237290564	0.09892754222176313	0.9010724577785524	0.5517797817636113	0.1011229335500052	0.8988770664501331	0.20265265266921195
464	0.471927264515489	0.6901074392585456	2.2664433108793975	-11.189826999699143	0.09929055410683067	0.9007094458934883	0.5437084677357243	0.10076718514875724	0.8992328148513797	0.20181440525936817
465	0.4771730345618437	0.6908323307772979	2.2663904361190506	-11.189723095830836	0.09958641564908624	0.9004135843512351	0.5355934908908417	0.10047293645181138	0.8995270635483249	0.2011181403455764
466	0.48242036207280065	0.691408988732985	2.2664022517289606	-11.189746622140529	0.09981634937916652	0.9001836506211559	0.5274429788757837	0.10024003288137769	0.8997599671187582	0.20056419073081092
467	0.4876692263043446	0.6918366028586893	2.266459089140823	-11.189859437513292	0.09998157782770817	0.9000184221726144	0.5192650593373712	0.10006831985966629	0.8999316801404694	0.2001528892180459
468	0.49291952042421583	0.6921145567926744	2.266543920718533	-11.190028191899586	0.10008332352534789	0.8999166764749741	0.511067859922425	0.09995764280888725	0.9000423571912487	0.19988456861025558
469	0.4981710382844717	0.6922424283415788	2.266642299959619	-11.19022433411523	0.10012280900272237	0.8998771909975984	0.5028595082777647	0.09990784715125067	0.9000921528488856	0.1997595617104142
470	0.5034234615858478	0.6922199895474729	2.266742297029123	-11.190424094673967	0.10010125679046829	0.899898743209851	0.4946481320502113	0.09991877830896664	0.9000812216911702	0.19977820132149596
471	0.5086763474106781	0.6920472065600075	2.266834428105958	-11.190608440306148	0.1000198894192223	0.899980110581095	0.4864418588865854	0.09999028170424525	0.9000097182958922	0.1999408202464751
472	0.5139291161039317	0.6917242393148824	2.2669115773697213	-11.190762997588433	0.09987992941962111	0.9001200705806942	0.47824881643370754	0.10012220275929659	0.8998777972408415	0.20024775128832584
473	0.519181039484659	0.6912514410198715	2.2669689107810562	-11.190877943865667	0.0996825993223014	0.9003174006780119	0.4700771323383983	0.10031438689633076	0.899685613103808	0.2006993272500224
474	0.5244312293727812	0.6906293574496492	2.2670037811124706	-11.190947864384121	0.09942912165789987	0.9005708783424117	0.4619349342474788	0.10056667953755782	0.8994333204625815	0.20129588093453896
475	0.5296786264187247	0.6898587260506686	2.26701562396937	-11.190971575270034	0.09912071895705314	0.9008792810432571	0.4538303498077684	0.10087892610518792	0.8991210738949519	0.20203774514484982
476	0.5349219892258774	0.6889404748573439	2.267005844803162	-11.19095191267327	0.09875861375039795	0.9012413862499115	0.44577150666608817	0.1012509720214311	0.8987490279787089	0.20292525268392916
477	0.5401598837582562	0.6878757212208017	2.266977697159387	-11.190895489047199	0.09834402856857095	0.9016559714317384	0.4377665324692588	0.10168266270849749	0.8983173372916425	0.20395873635475123
478	0.545390673028081	0.6866657703514697	2.266936152624001	-11.190812418147011	0.09787818594220883	0.9021218140581013	0.4298235548641006	0.10217384358859714	0.8978261564115425	0.20513852896029025
479	0.5506125070601966	0.6853121136767722	2.266887763130197	-11.190716010895631	0.09736230840194827	0.9026376915983637	0.4219507014974344	0.10272436008394017	0.8972756399161989	0.2064649633035204
480	0.5558233131324382	0.6838164270152179	2.266840516467142	-11.190622444786104	0.09679761847842601	0.903202381521889	0.41415610001608116	0.10333405761673663	0.8966659423834014	0.20793837218741587
481	0.5610207862931074	0.682180568568161	2.2668036859915537	-11.1905504099609	0.09618533870227863	0.9038146612980409	0.40644787806686034	0.10400278160919668	0.8959972183909397	0.20955908841495102
482	0.5662023801587186	0.6804065767305308	2.2667876756845446	-11.190520735532834	0.09552669160414286	0.9044733083961827	0.39883416329659305	0.10473037748353037	0.8952696225166039	0.21132744478909998
483	0.571374176675173	0.6785044910106016	2.266849754412263	-11.190600589445925	0.09482443670705809	0.9051755632932653	0.3913087380582298	0.10551117937402964	0.8944888206261041	0.21323921861106204
484	0.5765198171341406	0.6764652123018957	2.2668780769715875	-11.190637589970866	0.09408447967484586	0.9059155203254744	0.38389722017710026	0.1063518044016444	0.8936481955984898	0.21530320275150666
485	0.5816361049638827	0.6742923170300376	2.2668739040486168	-11.190631983967771	0.09331002206020013	0.9066899779401171	0.3766056303866044	0.10725119013450446	0.892748809865631	0.21751948474639796
486	0.5867208368115151	0.6719907361558927	2.266847988898779	-11.190596786618434	0.09250417732447079	0.9074958226758435	0.36943789407618227	0.10820746257599224	0.891792537424145	0.21988733540478084
487	0.5917714068894291	0.6695654890669733	2.2668102697932175	-11.190544755183282	0.09167005892900759	0.9083299410713036	0.36239793663527237	0.10921874772949035	0.890781252270649	0.2224060255357008
488	0.5967848119469584	0.6670216689509125	2.266769543804359	-11.19048775549615	0.09081078033516041	0.9091892196651478	0.3554896834533149	0.11028317159838119	0.8897168284017604	0.22507482594820283
489	0.6017576569158356	0.6643644284419602	2.2667331567155333	-11.190436147769473	0.08992945500427908	0.9100705449960259	0.3487170599197493	0.11139886018604728	0.8886011398140965	0.227893007451332
490	0.6066861612947736	0.661598965561413	2.2667067097562885	-11.190398195111698	0.08902919639771345	0.9109708036025881	0.3420839914240152	0.11256393949587105	0.8874360605042746	0.23085984085413352
491	0.6115661663370302	0.6587305099713872	2.2666937838210144	-11.190379498080917	0.08811311797681336	0.9118868820234844	0.3355944033555522	0.11377653553123501	0.8862234644689122	0.23397459696565248
492	0.6163931431030732	0.6557643095598509	2.2666956818259676	-11.190382458558505	0.08718433320292868	0.9128156667973651	0.32925222110380026	0.11503477429552156	0.8849652257046267	0.2372365465949338
493	0.6211622014384746	0.65270561737336	2.2667111899013364	-11.190405776234755	0.08624595553740914	0.9137540444628802	0.323061370058198	0.11633678179211333	0.8836632182080351	0.24064496055102302
494	0.6258680999349023	0.6495596789124927	2.2667363582016753	-11.190443981063181	0.08530109844160466	0.9146989015586799	0.3170257756081857	0.11768068402439273	0.8823193159757549	0.24419910964296512
495	0.6305052569295898	0.6463317198035332	2.266764302248994	-11.19048700516522	0.08435287537686503	0.9156471246234141	0.31114936314320263	0.11906460699574224	0.8809353930044034	0.2478982646798052
496	0.6350677625958862	0.6430269338585414	2.26678502589586	-11.190519797853117	0.08340439980454013	0.916595600195733	0.3054360580526885	0.12048667670954433	0.879513323290598	0.25174169647058836
497	0.6395497403160864	0.6396507695467468	2.2667887907871167	-11.190526374509021	0.0824586827117419	0.9175413172885264	0.2998893847235676	0.1219447709152776	0.8780552290848637	0.25572847535986937
498	0.6439482621503515	0.6362110909517766	2.26678853362698	-11.190525961318206	0.0815180265550904	0.9184819734451745	0.2945089436363054	0.12343512737989143	0.8765648726202518	0.2598553752578823
499	0.64825965667947	0.6327149485732106	2.266788641000918	-11.190526134544177	0.08058477311700657	0.9194152268832549	0.2892951114340834	0.12495445749548995	0.8750455425046555	0.2641196109064352
