# Supplementary material
Source: ML conference proceedings conference paper supplement (https://openreview.net/forum?id=bsycpMi00R1)
Supplement: supplementary_material [file Simulation - Restricted Space Convergence - 1.xlsx]

## Sheet: Player Data
Player ID	Team	Strategy Space	Initial Strategy
1	1	[.05,.4]	0.1
2	1	[.6,.95]	0.9
3	1	[.05,.4]	0.2
4	2	[.05,.4]	0.1
5	2	[.6,.95]	0.9
6	2	[.6,.95]	0.8

## Sheet: Simulation Information
Simulation Name	Team ID 1	Team ID 2	Strategy Space	Simulation Time	Discretized Steps
Simulation	1	2	[0.504, 0.8644999999999999],[0.13550000000000006, 0.496]	100	500

## Sheet: Simulation
Step	T1	T2	KL	Lyapunov	T1P1	T1P2	T1P3	T2P4	T2P5	T2P6
0	0.692	0.30799999999999994	2.4895895976923823	nan	0.1	0.9	0.2	0.1	0.9	0.8
1	0.686466571545629	0.30255774508478117	2.4895974120330235	nan	0.10224325285598411	0.8977567471440159	0.2053503810318442	0.09781197889511366	0.9021880211048864	0.8051559542472221
2	0.6808521375024167	0.2972203294241801	2.4895952896813913	nan	0.10453858652384364	0.8954614134761564	0.21089511756227317	0.09568402519664396	0.904315974803356	0.8101148905798028
3	0.6751698130782796	0.29199827507228315	2.48958645978393	nan	0.10688115504283553	0.8931188449571645	0.21663151453462284	0.09361921095024316	0.9063807890497568	0.8148767590680507
4	0.6694337621048216	0.2869003606043917	2.4895832413964305	nan	0.10926530147497074	0.8907346985250293	0.22255557449855992	0.09161967981235557	0.9083803201876444	0.8194428065906642
5	0.6636575475868031	0.28193532216940254	2.489587082075981	nan	0.11168536888226019	0.8883146311177399	0.2286633000037512	0.08968757543942545	0.9103124245605746	0.8238142800263418
6	0.6578547295786445	0.2771078746477873	2.489618399835657	nan	0.1141359654430746	0.8858640345569246	0.2349492695773492	0.08782263953222617	0.9121773604677754	0.8279944284706623
7	0.6520384835883557	0.27242393026585754	2.489682053495577	nan	0.11661114496611043	0.8833888550338869	0.24140830662340512	0.08602564471350443	0.9139743552865015	0.8319859655205586
8	0.6462209727569573	0.26790080000315986	2.48969570028557	nan	0.11910297066332198	0.8808970293366744	0.2480383136646581	0.08430443706428514	0.9156955629357232	0.8357862236520474
9	0.6404160653839828	0.26354062229109776	2.489680701261694	nan	0.12160430850092756	0.8783956914990687	0.2548316283633196	0.08265781076127494	0.9173421892387341	0.8394001041292538
10	0.6346366348397998	0.25934509247440485	2.4896527527700014	nan	0.12410802444514545	0.8758919755548513	0.261780588381601	0.08108455998118046	0.9189154400188282	0.842832508216303
11	0.6288945453517691	0.2553154747184224	2.489622653377901	nan	0.12660698446219393	0.8733930155378037	0.2688775313817138	0.07958347890070831	0.9204165210992993	0.8460883371773198
12	0.6232006435055212	0.2514526144311834	2.4895970577837883	nan	0.12909405451829134	0.8709059454817073	0.27611479502586933	0.07815336169656514	0.9218466383034413	0.8491724922764294
13	0.6175647551085983	0.24775695113888596	2.4895792112247497	nan	0.13156210057965595	0.8684378994203437	0.283484716976279	0.07679300254545757	0.923206997454548	0.8520898747777569
14	0.6119956870480028	0.24422853175582526	2.4895696592526804	nan	0.13400398861250606	0.8659960113874942	0.2909796348951544	0.07550119562409223	0.9244988043759133	0.8548453859454274
15	0.6065012337601061	0.24086702419228878	2.489566928843179	nan	0.13641258458306	0.8635874154169404	0.2985918864447068	0.07427673510917576	0.9257232648908308	0.8574439270435658
16	0.6010881879209101	0.23767173124631313	2.4895681776886454	nan	0.138780754457536	0.8612192455424639	0.30631380928714763	0.07311841517741477	0.9268815848225946	0.8598903993362971
17	0.595762354956805	0.2346416047275396	2.4895698092546246	nan	0.1411013642021524	0.858898635797846	0.3141377410846884	0.0720250300055159	0.9279749699944986	0.8621897040877465
18	0.5905285709707495	0.23177525976370295	2.4895680517891874	nan	0.1433672797831275	0.8566327202168682	0.32205601949954044	0.07099537377018578	0.9290046262298365	0.8643467425620391
19	0.5853907236761923	0.22907098924253178	2.4895595000065702	nan	0.1455713671666796	0.854428632833312	0.3300609821939152	0.07002824064813104	0.929971759351902	0.8663664160233
20	0.5803522566762207	0.22652600588522454	2.489549290976126	nan	0.14770633448490533	0.8522936655150829	0.338144143479379	0.06912206425453787	0.9308779357455037	0.86825404959776
21	0.5754146843896938	0.2241358259090811	2.4895493435438434	nan	0.14976642132424214	0.8502335786757459	0.3462977011756206	0.068274260067553	0.9317257399324881	0.8700150823207357
22	0.5705771343267951	0.22189814006935527	2.489548625213393	nan	0.151746709647424	0.8482532903525638	0.35451655635355134	0.0674833441485399	0.9325166558515006	0.8716535018304695
23	0.5658391465509739	0.21980959502948605	2.4895494421275215	nan	0.15364158119511725	0.8463584188048703	0.36279412598753874	0.06674758552144094	0.9332524144785991	0.8731739196926877
24	0.5611989655419146	0.21786706716591586	2.4895498121778887	nan	0.15544617326077517	0.8445538267392122	0.3711246272258423	0.0660653587492738	0.9339346412507658	0.8745804863221086
25	0.5566541405668683	0.21606733505331555	2.4895493270924325	nan	0.15715581848817323	0.842844181511814	0.3795024830267702	0.06543506950370914	0.93456493049633	0.8758772284545059
26	0.552201579321559	0.21440709814978653	2.4895493501086117	nan	0.15876603361778086	0.8412339663822063	0.38792231738928107	0.06485515787960769	0.9351448421204311	0.8770680523684475
27	0.5478373207969983	0.21288327053315137	2.4895493237410173	nan	0.16027286689359657	0.8397271331063904	0.3963793317826003	0.0643241721064988	0.9356758278935396	0.8781565060867069
28	0.545639512936859	0.21147588687729368	2.4914387619572507	nan	0.16168987068453936	0.8383101293154475	0.40031013512021085	0.06383484480504875	0.9361651551949893	0.8791579695446614
29	0.5452585004933881	0.21009453194886707	2.4949510009926668	nan	0.16310498791843706	0.8368950120815496	0.40031013512062963	0.06335557441945586	0.9366444255805819	0.8801373784245994
30	0.5448762229256887	0.20872654418336745	2.4984503827889197	nan	0.16453080423466568	0.8354691957653207	0.4003101344337335	0.0628819206749758	0.9371180793250617	0.8811038870836739
31	0.5444929293456772	0.20737153842154343	2.5019430897049313	nan	0.165966628188359	0.8340333718116274	0.40031006937716485	0.06241367136094541	0.9375863286390919	0.8820578107182309
32	0.5441084338712597	0.20603024536140424	2.505418875086109	nan	0.16741314908194732	0.832586850918039	0.4003100228577566	0.06195111578525967	0.9380488842147773	0.8829988779807126
33	0.5437228241688273	0.20470268800628877	2.508877815079906	nan	0.16887017991358533	0.8311298200864008	0.4003099924843898	0.06149422542457389	0.9385057745754628	0.8839271886101868
34	0.5433361872672882	0.20338888673095123	2.512319934899721	nan	0.1703375336814278	0.8296624663185582	0.40030997586594563	0.06104297175554338	0.938957028244493	0.8848428423457207
35	0.5429486095421482	0.20208885930394005	2.5157452104877436	nan	0.17181502338362933	0.8281849766163565	0.40030997061130513	0.06059732625482344	0.9394026737452127	0.8857459389263821
36	0.5425601766999131	0.2008026209101723	2.5191535701825547	nan	0.17330246201834473	0.826697537981641	0.40030997432934934	0.060157260399069365	0.9398427396009664	0.8866365780912383
37	0.5421709737628093	0.19953018417369084	2.5225448963896318	nan	0.17479966258372864	0.8252003374162569	0.40030998462895945	0.05972274566493647	0.9402772543350991	0.8875148595793568
38	0.5417810850538275	0.19827155918059947	2.525919027252999	nan	0.1763064380779358	0.8236935619220496	0.40030999911901655	0.05929375352908004	0.9407062464709552	0.8883808831298052
39	0.5413905941820838	0.19702675350216603	2.5292757583264276	nan	0.17782260149912094	0.8221773985008644	0.4003100154084016	0.05887025546815539	0.9411297445318796	0.889234748481651
40	0.5409995840285009	0.19579577221808842	2.5326148442426417	nan	0.1793479658454387	0.8206520341545465	0.40031003110599583	0.05845222295881782	0.941547777041217	0.8900765553739614
41	0.540608136731808	0.19457861793991327	2.5359360003791895	nan	0.18088234411504378	0.8191176558849412	0.4003100438206803	0.05803962747772263	0.9419603725223119	0.8909064035458042
42	0.540216333674858	0.1933752908346028	2.5392389045196353	nan	0.18242554930609095	0.8175744506938939	0.40031005116133606	0.05763244050152512	0.9423675594985091	0.8917243927362468
43	0.5398242554712624	0.19218578864823888	2.542523198508901	nan	0.18397739441673489	0.8160226055832497	0.4003100507368442	0.057230633506880596	0.9427693664931533	0.8925306226843567
44	0.5394319819523432	0.19101010672986118	2.5457884899016143	nan	0.18553769244513027	0.8144623075548542	0.4003100401560859	0.05683417797044436	0.9431658220295893	0.8933251931292012
45	0.5390395921544	0.18984823805542805	2.5490343536024334	nan	0.18710625638943185	0.8128937436105524	0.40031001702794217	0.05644304536887171	0.9435569546311617	0.8941082038098482
46	0.5386471643062934	0.18870017325189758	2.552260333497361	nan	0.18868289924779427	0.8113171007521898	0.4003099789612941	0.05605720717881796	0.9439427928212153	0.8948797544653648
47	0.5382547758173433	0.18756590062141665	2.5554659440751593	nan	0.19026743401837232	0.8097325659816115	0.4003099235650228	0.05567663487693839	0.9443233651230946	0.8956399448348188
48	0.53786250326554	0.18644540616561678	2.5586506720379623	nan	0.19185967369932064	0.8081403263006629	0.40030984844800943	0.05530129993988832	0.9446987000601444	0.8963888746572775
49	0.5374704223860701	0.185338673610004	2.5618139779003446	nan	0.19345943128879395	0.8065405687111894	0.400309751219135	0.05493117384432305	0.9450688261557095	0.8971266436718083
50	0.5370786080601543	0.1842456844284419	2.564955297576028	nan	0.19506651978494696	0.8049334802150361	0.40030962948728055	0.05456622806689787	0.9454337719331345	0.8978533516174789
51	0.5366871343041971	0.18316641786771648	2.5680740439515573	nan	0.19668075218593437	0.8033192478140484	0.4003094808613273	0.0542064340842681	0.945793565915764	0.8985690982333567
52	0.5362960564964936	0.182100863574723	2.5711695040193163	nan	0.19830193908232552	0.801698060917657	0.4003093533283757	0.0538517657500052	0.9461482342500268	0.8992739716843794
53	0.535905419730224	0.18104899320388057	2.5742412758248197	nan	0.19992984561726318	0.8000701543827191	0.4003093533283757	0.05350218665311073	0.946497813346921	0.8999680616929113
54	0.5355153540916905	0.18001070703612498	2.5772895953472617	nan	0.20156423238638524	0.7984357676135969	0.4003093533283757	0.05315764389285397	0.9468423561071776	0.9006515149998162
55	0.5351259397617535	0.17898594495107023	2.580314273381555	nan	0.2032048677029735	0.7967951322970084	0.4003093533283757	0.05281809459280451	0.9471819054072268	0.901324443460574
56	0.5347372558044416	0.17797464448075728	2.583315106674566	nan	0.20485151988030983	0.7951484801196719	0.4003093533283757	0.05248349587653197	0.9475165041234991	0.901986958930665
57	0.534349380155621	0.17697674084359605	2.586291879555273	nan	0.2065039572316761	0.7934960427683053	0.4003093533283757	0.052153804867605964	0.947846195132425	0.9026391732655692
58	0.5339623896120895	0.1759921669782244	2.589244365535131	nan	0.20816194807035412	0.7918380519296271	0.4003093533283757	0.0518289786895961	0.9481710213104346	0.9032811983207668
59	0.5335763598211039	0.17502085357727948	2.5921723288777976	nan	0.20982526070962582	0.7901747392903552	0.4003093533283757	0.05150897446607198	0.9484910255339585	0.903913145951738
60	0.5331913652703297	0.17406272912107124	2.5950755261375944	nan	0.21149366346277293	0.7885063365372079	0.4003093533283757	0.05119374932060323	0.948806250679427	0.9045351280139627
61	0.532807479278224	0.17311771991115088	2.597953707665975	nan	0.2131669246430774	0.7868330753569032	0.4003093533283757	0.05088326037675944	0.9491167396232706	0.9051472563629213
62	0.5324247739848429	0.1721857501037667	2.6008066190854455	nan	0.21484481256382104	0.7851551874361593	0.4003093533283757	0.05057746475811025	0.9494225352419197	0.9057496428540937
63	0.5320433209029317	0.171266740189847	2.603634028878963	nan	0.21652709306190066	0.7834729069380795	0.4003093533283757	0.05027631873601485	0.9497236812640149	0.9063423997230258
64	0.5316631933576966	0.17038823290454186	2.6060783844275637	nan	0.2182135185302677	0.7817864814697123	0.4003093533283757	0.04999863507674588	0.9500013649232836	0.9069256389780762
65	0.5312847368919597	0.16992376075628401	2.603304441302593	nan	0.2199026169830444	0.7800973830169353	0.4003093533283757	0.04999863507674927	0.9500013649232802	0.9074990579047877
66	0.5309082257437648	0.16946738340916234	2.6005599534402286	nan	0.2215932019649933	0.7784067980349862	0.4003093533283757	0.04999863507676533	0.9500013649232643	0.9080624833104965
67	0.5305337128656696	0.16901897132403543	2.5978449002072113	nan	0.22328506077778087	0.7767149392221985	0.4003093533283757	0.049998635076727284	0.9500013649233022	0.9086160751189776
68	0.5301612497617182	0.16857839763585647	2.5951592443338427	nan	0.22497798211312023	0.7750220178868589	0.4003093533283757	0.049998635076743826	0.9500013649232857	0.9091599899529925
69	0.52979088679786	0.16814553547957878	2.5925029530880748	nan	0.22667175466272454	0.7733282453372543	0.4003093533283757	0.049998635076923634	0.9500013649231059	0.9096943844353035
70	0.529422100816719	0.1677216939593833	2.589858954236705	nan	0.22836880929006428	0.7716311907099134	0.4003093533283757	0.049998635077090264	0.9500013649229393	0.9102176423973936
71	0.5290551837713744	0.16730615493962908	2.587234320839774	nan	0.23006785172524824	0.7699321482747278	0.4003093533283757	0.049998635077090264	0.9500013649229393	0.9107306504208149
72	0.5286906968907659	0.16689750782847912	2.58464430863176	nan	0.2317662962217495	0.768233703778225	0.4003093533283757	0.049998635077090264	0.9500013649229393	0.9112351499667105
73	0.5283286678354798	0.16649567256531772	2.582088369879454	nan	0.23346400122370553	0.7665359987762675	0.4003093533283757	0.049998635077090264	0.9500013649229393	0.911731239874747
74	0.5279691235006148	0.1661005690895293	2.5795659680339282	nan	0.2351608251752538	0.7648391748247182	0.4003093533283757	0.049998635077090264	0.9500013649229393	0.9122190189845909
75	0.5276120900166963	0.1657121173404984	2.57707657793856	nan	0.23685662652053188	0.7631433734794391	0.4003093533283757	0.049998635077090264	0.9500013649229393	0.9126985861359087
76	0.527257592750751	0.16533023725760942	2.574619686025529	nan	0.23855126370367724	0.7614487362962928	0.4003093533283757	0.049998635077090264	0.9500013649229393	0.913170040168367
77	0.5269056563075416	0.16495484878024658	2.5721947905007987	nan	0.24024459516882737	0.759755404831142	0.4003093533283757	0.049998635077090264	0.9500013649229393	0.9136334799216325
78	0.5265563045309607	0.1645858718477945	2.5698014015176467	nan	0.24193647936011983	0.758063520639849	0.4003093533283757	0.049998635077090264	0.9500013649229393	0.9140890042353714
79	0.5262095605055845	0.1642232263996377	2.5674390413387966	nan	0.24362677472169203	0.7563732252782763	0.4003093533283757	0.049998635077090264	0.9500013649229393	0.9145367119492505
80	0.5258654465583874	0.16386683237516042	2.565107244487196	nan	0.24531533969768154	0.7546846603022865	0.4003093533283757	0.049998635077090264	0.9500013649229393	0.9149767019029362
81	0.5255239842606149	0.16351660971374715	2.5628055578855227	nan	0.24700203273222585	0.752997967267742	0.4003093533283757	0.049998635077090264	0.9500013649229393	0.9154090729360952
82	0.5251851944298173	0.1631724783547822	2.56053354098448	nan	0.24868671226946243	0.7513132877305053	0.4003093533283757	0.049998635077090264	0.9500013649229393	0.915833923888394
83	0.5248490971320428	0.16283435823765025	2.5582907658799545	nan	0.25036923675352885	0.7496307632464388	0.4003093533283757	0.049998635077090264	0.9500013649229393	0.916251353599499
84	0.5245157116841906	0.16250216930173556	2.5560768174191555	nan	0.25204946462856254	0.7479505353714052	0.4003093533283757	0.049998635077090264	0.9500013649229393	0.916661460909077
85	0.524185056656524	0.16217583148642267	2.5538912932957922	nan	0.253727254338701	0.7462727456612669	0.4003093533283757	0.049998635077090264	0.9500013649229393	0.9170643446567942
86	0.5238571498753425	0.1618552647310958	2.551733804134421	nan	0.2554024643280819	0.7445975356718861	0.4003093533283757	0.049998635077090264	0.9500013649229393	0.9174601036823175
87	0.5235320084258146	0.16154038897513956	2.549603973564092	nan	0.2570749530408425	0.7429250469591258	0.4003093533283757	0.049998635077090264	0.9500013649229393	0.9178488368253132
88	0.5232096486549699	0.1612311241579384	2.547501438281391	nan	0.2587445789211204	0.7412554210788481	0.4003093533283757	0.049998635077090264	0.9500013649229393	0.9182306429254479
89	0.5228900861748514	0.1609273902188766	2.545425848103049	nan	0.26041120041305316	0.7395887995869157	0.4003093533283757	0.049998635077090264	0.9500013649229393	0.9186056208223882
90	0.5225733358658274	0.16062910709733869	2.543376866008251	nan	0.2620746759607782	0.737925324039191	0.4003093533283757	0.049998635077090264	0.9500013649229393	0.9189738693558006
91	0.5222594118800628	0.1603361947327091	2.541354168170831	nan	0.2637348640084331	0.7362651359915364	0.4003093533283757	0.049998635077090264	0.9500013649229393	0.9193354873653516
92	0.5219483276451509	0.16004857306437215	2.539357443981487	nan	0.2653916230001553	0.7346083769998145	0.4003093533283757	0.049998635077090264	0.9500013649229393	0.919690573690708
93	0.5216400958679046	0.15976616203171246	2.5373863960602705	nan	0.26704481138008235	0.7329551886198878	0.4003093533283757	0.049998635077090264	0.9500013649229393	0.920039227171536
94	0.5213347285383079	0.15948888157411423	2.5354407402594816	nan	0.2686942875923517	0.7313057124076188	0.4003093533283757	0.049998635077090264	0.9500013649229393	0.9203815466475023
95	0.5210322369336259	0.1592166516309621	2.5335202056572275	nan	0.27033991008110086	0.7296600899188699	0.4003093533283757	0.049998635077090264	0.9500013649229393	0.9207176309582734
96	0.5207326316226767	0.15894939214164028	2.5316245345418613	nan	0.27198153729046737	0.7280184627095035	0.4003093533283757	0.049998635077090264	0.9500013649229393	0.921047578943516
97	0.5204359224702609	0.15868702304553328	2.5297534823875303	nan	0.27361902766458873	0.7263809723353825	0.4003093533283757	0.049998635077090264	0.9500013649229393	0.9213714894428965
98	0.5201421186417527	0.15842946428202576	2.527906817821088	nan	0.2752522396476024	0.7247477603523689	0.4003093533283757	0.049998635077090264	0.9500013649229393	0.9216894612960814
99	0.5198512286078498	0.15817663579050179	2.5260843225806386	nan	0.276881031683646	0.7231189683163254	0.4003093533283757	0.049998635077090264	0.9500013649229393	0.9220015933427373
100	0.5195632601494831	0.15792845751034612	2.524285791465976	nan	0.2785052622168568	0.7214947377831146	0.4003093533283757	0.049998635077090264	0.9500013649229393	0.9223079844225308
101	0.5192782203628868	0.15768484938094285	2.5225110322812156	nan	0.2801247896913725	0.7198752103085988	0.4003093533283757	0.049998635077090264	0.9500013649229393	0.9226087333751284
102	0.5189961156648281	0.15744573134167672	2.5207598657698993	nan	0.2817394725513306	0.7182605274486406	0.4003093533283757	0.049998635077090264	0.9500013649229393	0.9229039390401966
103	0.5187169517979959	0.15721102333193182	2.519032125542906	nan	0.2833491692408685	0.7166508307591023	0.4003093533283757	0.049998635077090264	0.9500013649229393	0.9231937002574021
104	0.5184407338365511	0.156980645291093	2.5173276579994566	nan	0.28495373820412373	0.7150462617958466	0.4003093533283757	0.049998635077090264	0.9500013649229393	0.9234781158664112
105	0.5181674661918344	0.15675451715854438	2.515646322241559	nan	0.2865530378852339	0.713446962114736	0.4003093533283757	0.049998635077090264	0.9500013649229393	0.9237572847068907
106	0.5178971526182363	0.15653255887367046	2.5139879899822324	nan	0.2881469267283363	0.7118530732716328	0.4003093533283757	0.049998635077090264	0.9500013649229393	0.9240313056185069
107	0.5176297962192248	0.15631469037585566	2.512352545447845	nan	0.28973526317756865	0.7102647368223998	0.4003093533283757	0.049998635077090264	0.9500013649229393	0.9243002774409265
108	0.517365399453534	0.1561008316044843	2.5107398852749343	nan	0.2913179056770684	0.7086820943228991	0.4003093533283757	0.049998635077090264	0.9500013649229393	0.9245642990138161
109	0.5171039641415129	0.1558909024989411	2.5091499184018584	nan	0.2928947126709729	0.7071052873289934	0.4003093533283757	0.049998635077090264	0.9500013649229393	0.924823469176842
110	0.5168454914716331	0.1556848229986103	2.5075825659556648	nan	0.29446554260341984	0.7055344573965452	0.4003093533283757	0.049998635077090264	0.9500013649229393	0.925077886769671
111	0.5165899820071562	0.1554825130428763	2.506037761134545	nan	0.29603025391854665	0.7039697460814169	0.4003093533283757	0.049998635077090264	0.9500013649229393	0.9253276506319695
112	0.5163374356929623	0.15528389257112363	2.504515449086256	nan	0.2975887050604908	0.7024112949394712	0.4003093533283757	0.049998635077090264	0.9500013649229393	0.9255728596034041
113	0.5160878518625368	0.1550888815227366	2.503015586782909	nan	0.2991407544733898	0.7008592455265703	0.4003093533283757	0.049998635077090264	0.9500013649229393	0.9258136125236414
114	0.5158412292451183	0.15489739983709983	2.5015381428925156	nan	0.30068626060138126	0.6993137393985768	0.4003093533283757	0.049998635077090264	0.9500013649229393	0.9260500082323477
115	0.5155975659730052	0.15470936745359742	2.5000830976476873	nan	0.30222508188860253	0.6977749181113532	0.4003093533283757	0.049998635077090264	0.9500013649229393	0.9262821455691899
116	0.5153568595890227	0.15452470431161414	2.498650442711896	nan	0.30375707677919117	0.696242923220762	0.4003093533283757	0.049998635077090264	0.9500013649229393	0.9265101233738343
117	0.5151191070541495	0.15434333035053427	2.497240181043699	nan	0.3052821037172847	0.6947178962826657	0.4003093533283757	0.049998635077090264	0.9500013649229393	0.9267340404859474
118	0.5148843047553048	0.15416516550974213	2.495852326759352	nan	0.3068000211470207	0.6931999788529267	0.4003093533283757	0.049998635077090264	0.9500013649229393	0.926953995745196
119	0.514652364277975	0.15399032632279352	2.494484379063328	nan	0.30831123851374087	0.6916887614862036	0.4003093533283757	0.049998635077090264	0.9500013649229393	0.9271698452838655
120	0.5144223322685981	0.15382098643176811	2.493107585361205	nan	0.30982188162952173	0.690178118370426	0.4003093533283757	0.049998635077090264	0.9500013649229393	0.9273789056094944
121	0.5141953502758474	0.15365441914948041	2.4917561230548353	nan	0.311324350175179	0.6886756498247715	0.4003093533283757	0.049998635077090264	0.9500013649229393	0.9275845429821378
122	0.5139713887010521	0.15349059456521152	2.4904293809370976	nan	0.312818645577382	0.687181354422571	0.4003093533283757	0.049998635077090264	0.9500013649229393	0.9277867943283852
123	0.5137504181121854	0.15332948276824243	2.489126764530104	nan	0.31430476926279977	0.6856952307371553	0.4003093533283757	0.049998635077090264	0.9500013649229393	0.9279856965748261
124	0.5135324092437719	0.15317105384785434	2.4878476957361118	nan	0.31578272265810164	0.6842172773418552	0.4003093533283757	0.049998635077090264	0.9500013649229393	0.92818128664805
125	0.5133173329967942	0.15301527789332803	2.486591612497892	nan	0.31725250718995684	0.6827474928100016	0.4003093533283757	0.049998635077090264	0.9500013649229393	0.9283736014746464
126	0.5131051604386002	0.15286212499394491	2.4853579684681018	nan	0.3187141242850346	0.681285875714925	0.4003093533283757	0.049998635077090264	0.9500013649229393	0.9285626779812047
127	0.5128958628028103	0.15271156523898577	2.4841462326873076	nan	0.32016757537000406	0.6798324246299565	0.4003093533283757	0.049998635077090264	0.9500013649229393	0.9287485530943147
128	0.5126894114892242	0.1525635687177318	2.4829558892702703	nan	0.32161286187153454	0.6783871381284268	0.4003093533283757	0.049998635077090264	0.9500013649229393	0.9289312637405656
129	0.512485778063728	0.152418105519464	2.4817864371001503	nan	0.32304998521629513	0.6769500147836666	0.4003093533283757	0.049998635077090264	0.9500013649229393	0.9291108468465469
130	0.5122849342582013	0.15227514573346346	2.4806373895303038	nan	0.32447894683095524	0.6755210531690068	0.4003093533283757	0.049998635077090264	0.9500013649229393	0.9292873393388482
131	0.5120868519704249	0.15213465944901128	2.479508274093356	nan	0.3258997481421839	0.6741002518577781	0.4003093533283757	0.049998635077090264	0.9500013649229393	0.929460778144059
132	0.511891503263987	0.15199661675538845	2.4783986322172495	nan	0.3273123905766505	0.6726876094233113	0.4003093533283757	0.049998635077090264	0.9500013649229393	0.9296312001887688
133	0.511698860368191	0.15186098774187606	2.477308018948012	nan	0.32871687556102414	0.6712831244389372	0.4003093533283757	0.049998635077090264	0.9500013649229393	0.929798642399567
134	0.5115088956779625	0.1517277424977551	2.4762360026789425	nan	0.3301132045219741	0.6698867954779868	0.4003093533283757	0.049998635077090264	0.9500013649229393	0.9299631417030433
135	0.5113215817537565	0.1515968511123068	2.4751821648860055	nan	0.3315013788861696	0.6684986211137905	0.4003093533283757	0.049998635077090264	0.9500013649229393	0.930124735025787
136	0.5111368913214647	0.15146828367481213	2.4741460998691664	nan	0.33288140008027983	0.6671185999196795	0.4003093533283757	0.049998635077090264	0.9500013649229393	0.9302834592943876
137	0.5109547972723224	0.15134201027455207	2.47312741449947	nan	0.334253269530974	0.6657467304689842	0.4003093533283757	0.049998635077090264	0.9500013649229393	0.9304393514354347
138	0.5107752726628163	0.15121800100080773	2.4721257279716236	nan	0.3356169886649214	0.6643830113350357	0.4003093533283757	0.049998635077090264	0.9500013649229393	0.9305924483755178
139	0.5105982907145912	0.1510962259428602	2.4711406715619244	nan	0.3369725589087912	0.6630274410911646	0.4003093533283757	0.049998635077090264	0.9500013649229393	0.9307427870412263
140	0.5104238248143574	0.1509766551899906	2.470171888391313	nan	0.3383199816892526	0.6616800183107019	0.4003093533283757	0.049998635077090264	0.9500013649229393	0.9308904043591497
141	0.5102518485137986	0.15085925883147977	2.4692190331933874	nan	0.3396592584329749	0.6603407415669782	0.4003093533283757	0.049998635077090264	0.9500013649229393	0.9310353372558777
142	0.5100823355294781	0.15074400695660906	2.468281772087214	nan	0.3409903905666273	0.6590096094333243	0.4003093533283757	0.049998635077090264	0.9500013649229393	0.9311776226579995
143	0.5099152597427471	0.15063086965465933	2.46735978235478	nan	0.3423133795168789	0.657686620483071	0.4003093533283757	0.049998635077090264	0.9500013649229393	0.9313172974921049
144	0.5097505951996515	0.1505198170149118	2.466452752222936	nan	0.3436282267103991	0.6563717732895493	0.4003093533283757	0.049998635077090264	0.9500013649229393	0.9314543986847831
145	0.5095883161108394	0.15041081912664722	2.465560380649694	nan	0.344934933573857	0.6550650664260897	0.4003093533283757	0.049998635077090264	0.9500013649229393	0.9315889631626239
146	0.5094283968514688	0.15030384607914704	2.4646823771147437	nan	0.34623350153392196	0.6537664984660232	0.4003093533283757	0.049998635077090264	0.9500013649229393	0.9317210278522164
147	0.5092708119611142	0.15019886796169213	2.4638184614140854	nan	0.347523932017263	0.6524760679826804	0.4003093533283757	0.049998635077090264	0.9500013649229393	0.9318506296801504
148	0.5091155361436748	0.15009585486356336	2.462968363458633	nan	0.3488062264505495	0.6511937735493922	0.4003093533283757	0.049998635077090264	0.9500013649229393	0.9319778055730155
149	0.5089625442672815	0.14999477687404228	2.462131823076705	nan	0.3500803862604506	0.6499196137394895	0.4003093533283757	0.049998635077090264	0.9500013649229393	0.9321025924574008
150	0.5088118113642044	0.14989560408240943	2.461308589820301	nan	0.35134641287363555	0.6486535871263029	0.4003093533283757	0.049998635077090264	0.9500013649229393	0.9322250272598962
151	0.5086633126307603	0.14979830657794613	2.460498422775049	nan	0.3526043077167736	0.6473956922831633	0.4003093533283757	0.049998635077090264	0.9500013649229393	0.9323451469070909
152	0.5085170234272203	0.1497028544499336	2.4597010903737653	nan	0.353854072216534	0.6461459277834015	0.4003093533283757	0.049998635077090264	0.9500013649229393	0.9324629883255745
153	0.5083729192777169	0.14960921778765246	2.458916370213511	nan	0.35509570779958577	0.6449042922003483	0.4003093533283757	0.049998635077090264	0.9500013649229393	0.9325785884419366
154	0.5082309758701519	0.14951736668038418	2.458144048876097	nan	0.35632921589259836	0.6436707841073344	0.4003093533283757	0.049998635077090264	0.9500013649229393	0.9326919841827666
155	0.5080911690561037	0.1494272712174095	2.457383921751947	nan	0.3575545979222409	0.6424454020776905	0.4003093533283757	0.049998635077090264	0.9500013649229393	0.932803212474654
156	0.507953474850735	0.14933890148800977	2.4566357928672566	nan	0.35877185531518263	0.6412281446847476	0.4003093533283757	0.049998635077090264	0.9500013649229393	0.9329123102441883
157	0.5078178694327	0.14925222758146595	2.4558994747143865	nan	0.35998098949809276	0.6400190105018366	0.4003093533283757	0.049998635077090264	0.9500013649229393	0.9330193144179589
158	0.5076843291440524	0.14916721958705892	2.455174788085431	nan	0.36118200189764055	0.638817998102288	0.4003093533283757	0.049998635077090264	0.9500013649229393	0.9331242619225556
159	0.5075528304901527	0.14908384759407012	2.4544615619088974	nan	0.36237489394049516	0.6376251060594327	0.4003093533283757	0.049998635077090264	0.9500013649229393	0.9332271896845675
160	0.507423350139576	0.1490020816917802	2.453759633089464	nan	0.3635596670533258	0.6364403329466015	0.4003093533283757	0.049998635077090264	0.9500013649229393	0.9333281346305844
161	0.5072958649240192	0.14892189196947048	2.453068846350754	nan	0.36473632266280176	0.6352636773371252	0.4003093533283757	0.049998635077090264	0.9500013649229393	0.9334271336871957
162	0.5071703518382094	0.14884324851642194	2.4523890540810767	nan	0.36590486219559226	0.6340951378043346	0.4003093533283757	0.049998635077090264	0.9500013649229393	0.9335242237809908
163	0.5070467880398106	0.14876612142191548	2.451720116182117	nan	0.36706528707836644	0.6329347129215604	0.4003093533283757	0.049998635077090264	0.9500013649229393	0.9336194418385594
164	0.5069251508493322	0.1486904807752325	2.4510618999205107	nan	0.3682175987377936	0.6317824012621336	0.4003093533283757	0.049998635077090264	0.9500013649229393	0.9337128247864908
165	0.5068054177500362	0.1486162966656538	2.450414279782289	nan	0.3693617986005429	0.6306382013993848	0.4003093533283757	0.049998635077090264	0.9500013649229393	0.9338044095513746
166	0.5066875663878448	0.14854353918246055	2.4497771373301367	nan	0.37049788809328366	0.6295021119066447	0.4003093533283757	0.049998635077090264	0.9500013649229393	0.9338942330598002
167	0.5065715745712487	0.14847217841493376	2.449150361063462	nan	0.371625868642685	0.6283741313572444	0.4003093533283757	0.049998635077090264	0.9500013649229393	0.9339823322383572
168	0.506457420271214	0.14840218445235454	2.448533846281226	nan	0.3727457416754162	0.6272542583245145	0.4003093533283757	0.049998635077090264	0.9500013649229393	0.9340687440136352
169	0.5063450816210909	0.14833352738400396	2.447927494947515	nan	0.3738575086181465	0.6261424913817859	0.4003093533283757	0.049998635077090264	0.9500013649229393	0.9341535053122234
170	0.5062345369165206	0.14826617729916303	2.447331215559827	nan	0.374961170897545	0.6250388291023893	0.4003093533283757	0.049998635077090264	0.9500013649229393	0.9342366530607115
171	0.5061257646153438	0.14820010428711272	2.4467449230200637	nan	0.37605672994028105	0.6239432700596553	0.4003093533283757	0.049998635077090264	0.9500013649229393	0.934318224185689
172	0.5060187433375074	0.14813527843713425	2.4461685385081786	nan	0.37714418717302384	0.6228558128269152	0.4003093533283757	0.049998635077090264	0.9500013649229393	0.9343982556137453
173	0.5059134518649739	0.14807166983850872	2.4456019893584875	nan	0.3782235440224425	0.6217764559774993	0.4003093533283757	0.049998635077090264	0.9500013649229393	0.93447678427147
174	0.5058098691416278	0.148009248580517	2.445045208938617	nan	0.3792948019152064	0.6207051980847386	0.4003093533283757	0.049998635077090264	0.9500013649229393	0.9345538470854525
175	0.5057079742731844	0.1479479847524402	2.4444981365310667	nan	0.38035796227798474	0.6196420377219639	0.4003093533283757	0.049998635077090264	0.9500013649229393	0.9346294809822825
176	0.5056077465270967	0.1478878484435594	2.4439607172173696	nan	0.38141302653744663	0.618586973462506	0.4003093533283757	0.049998635077090264	0.9500013649229393	0.9347037228885492
177	0.5055091653324645	0.14782880974315582	2.4434329017648464	nan	0.3824599961202614	0.6175400038796957	0.4003093533283757	0.049998635077090264	0.9500013649229393	0.9347766097308422
178	0.505412210279941	0.14777083874051034	2.4429146465159315	nan	0.3834988724530982	0.6165011275468636	0.4003093533283757	0.049998635077090264	0.9500013649229393	0.9348481784357512
179	0.5053168611216418	0.14771390552490404	2.442405913280056	nan	0.38452965696262625	0.6154703430373407	0.4003093533283757	0.049998635077090264	0.9500013649229393	0.9349184659298654
180	0.5052230977710521	0.14765798018561793	2.441906669228083	nan	0.3855523510755149	0.6144476489244577	0.4003093533283757	0.049998635077090264	0.9500013649229393	0.9349875091397745
181	0.5051309003029352	0.1476030328119332	2.441416886789284	nan	0.3865669562184331	0.6134330437815455	0.4003093533283757	0.049998635077090264	0.9500013649229393	0.9350553449920679
182	0.5050402489532396	0.14754903349313098	2.44093654355083	nan	0.3875734738180504	0.6124265261819348	0.4003093533283757	0.049998635077090264	0.9500013649229393	0.9351220104133351
183	0.5049511321350708	0.14749594805298993	2.4404657445809885	nan	0.3885718150978593	0.6114281849021285	0.4003093533283757	0.049998635077090264	0.9500013649229393	0.9351875475961857
184	0.5048635067432061	0.1474438283690772	2.4400035020845943	nan	0.3895622477237657	0.610437752276222	0.4003093533283757	0.049998635077090264	0.9500013649229393	0.9352518924946293
185	0.5047773415940877	0.14739267751475604	2.439549388418442	nan	0.39054491423304216	0.6094550857669454	0.4003093533283757	0.049998635077090264	0.9500013649229393	0.9353150413144131
186	0.5046926154114294	0.1473424784140429	2.4391032617685973	nan	0.3915198495019118	0.6084801504980756	0.4003093533283757	0.049998635077090264	0.9500013649229393	0.9353770151368704
187	0.5046093071708551	0.14729321399095463	2.438664985650285	nan	0.39248708840659785	0.6075129115933895	0.4003093533283757	0.049998635077090264	0.9500013649229393	0.9354378350433343
188	0.5045273960977537	0.14724486716950758	2.438234428807651	nan	0.39344666582332344	0.6065533341766638	0.4003093533283757	0.049998635077090264	0.9500013649229393	0.9354975221151379
189	0.5044468616651424	0.14719742087371845	2.4378114651155487	nan	0.39439861662831177	0.6056013833716754	0.4003093533283757	0.049998635077090264	0.9500013649229393	0.9355560974336141
190	0.5043676835915418	0.14715085802760397	2.437395973483347	nan	0.39534297569778587	0.604657024302201	0.4003093533283757	0.049998635077090264	0.9500013649229393	0.9356135820800963
191	0.5042898417782588	0.14710516196799506	2.4369878334366417	nan	0.39627977864055963	0.6037202213594272	0.4003093533283757	0.049998635077090264	0.9500013649229393	0.9356699966262728
192	0.5042133162527379	0.14706031679532028	2.436586921301636	nan	0.39720906249647364	0.602790937503513	0.4003093533283757	0.049998635077090264	0.9500013649229393	0.9357253607011256
193	0.5041380872409734	0.1470163070136684	2.4361931140907744	nan	0.3981308648834995	0.601869135116487	0.4003093533283757	0.049998635077090264	0.9500013649229393	0.9357796934352928
194	0.5040641352055075	0.14697311719621642	2.4358062928179907	nan	0.39904522352445054	0.6009547764755359	0.4003093533283757	0.049998635077090264	0.9500013649229393	0.9358330138741197
195	0.5039861197294667	0.14693082059910523	2.435369946764327	nan	0.40001888692285786	0.5999811130771284	0.4003093533283757	0.049998635077090264	0.9500013649229393	0.9358852315784746
196	0.5039624047506461	0.14688901194686887	2.4354972937305055	nan	0.40031674389214816	0.599683256107838	0.4003093533283757	0.049998635077090264	0.9500013649229393	0.9359368468854038
197	0.5039653607037781	0.14684738981223966	2.435901933231859	nan	0.4002795689796611	0.5997204310203251	0.4003093533283757	0.049998635077090264	0.9500013649229393	0.9359882319250791
198	0.5039660326417509	0.14680575367495152	2.436283162742779	nan	0.4002711204284515	0.5997288795715348	0.4003093533283757	0.049998635077090264	0.9500013649229393	0.9360396342518827
199	0.5039660327531224	0.14676414225846468	2.4366574759233037	nan	0.40027111902819085	0.5997288809717953	0.4003093533283757	0.049998635077090264	0.9500013649229393	0.9360910060593638
200	0.503966027408501	0.14672256191252053	2.4370317768263243	nan	0.40027118622547914	0.5997288137745072	0.4003093533283757	0.049998635077090264	0.9500013649229393	0.9361423395083829
201	0.5039660198914324	0.1466810129503877	2.4374060967213316	nan	0.40027128073676294	0.5997287192632236	0.4003093533283757	0.049998635077090264	0.9500013649229393	0.9361936342121909
202	0.5039660167317609	0.14663949527175657	2.437780504511978	nan	0.4002713204629971	0.5997286795369897	0.4003093533283757	0.049998635077090264	0.9500013649229393	0.9362448902946262
203	0.5039660144648853	0.14659800862732175	2.4381549660417283	nan	0.4002713489642046	0.5997286510357824	0.4003093533283757	0.049998635077090264	0.9500013649229393	0.9362961080634713
204	0.5039660129837882	0.146556553001303	2.4385294801260544	nan	0.40027136758590187	0.5997286324140854	0.4003093533283757	0.049998635077090264	0.9500013649229393	0.936347287538208
205	0.5039660121814517	0.1465151283779199	2.438904045580398	nan	0.4002713776736054	0.5997286223263819	0.4003093533283757	0.049998635077090264	0.9500013649229393	0.9363984287383178
206	0.5039660119508586	0.14647373474139214	2.4392786612201647	nan	0.4002713805728318	0.5997286194271555	0.4003093533283757	0.049998635077090264	0.9500013649229393	0.9364495316832829
207	0.5039660121849916	0.1464323720759394	2.4396533258607143	nan	0.4002713776290976	0.5997286223708898	0.4003093533283757	0.049998635077090264	0.9500013649229393	0.9365005963925848
208	0.5039660127768338	0.14639104036578132	2.440028038317383	nan	0.40027137018791925	0.5997286298120681	0.4003093533283757	0.049998635077090264	0.9500013649229393	0.9365516228857054
209	0.5039660136193682	0.14634973959513764	2.440402797405455	nan	0.4002713595948133	0.5997286404051739	0.4003093533283757	0.049998635077090264	0.9500013649229393	0.9366026111821263
210	0.5039660146055774	0.14630846974822798	2.4407776019401854	nan	0.40027134719529633	0.5997286528046908	0.4003093533283757	0.049998635077090264	0.9500013649229393	0.9366535613013295
211	0.5039660156284447	0.14626723080927184	2.441152450736787	nan	0.4002713343348849	0.5997286656651022	0.4003093533283757	0.049998635077090264	0.9500013649229393	0.9367044732627967
212	0.5039660165809525	0.1462260227624892	2.4415273426104322	nan	0.4002713223590954	0.5997286776408915	0.4003093533283757	0.049998635077090264	0.9500013649229393	0.9367553470860096
213	0.5039660173560839	0.14618484559209954	2.441902276376254	nan	0.4002713126134445	0.5997286873865424	0.4003093533283757	0.049998635077090264	0.9500013649229393	0.93680618279045
214	0.5039660178468216	0.14614369928232251	2.4422772508493527	nan	0.40027130644344866	0.5997286935565382	0.4003093533283757	0.049998635077090264	0.9500013649229393	0.9368569803955998
215	0.5039660179461483	0.14610258381737773	2.442652264844784	nan	0.4002713051946244	0.5997286948053624	0.4003093533283757	0.049998635077090264	0.9500013649229393	0.9369077399209407
216	0.5039660175470467	0.14606149918148503	2.4430273171775676	nan	0.40027131021248824	0.5997286897874986	0.4003093533283757	0.049998635077090264	0.9500013649229393	0.9369584613859544
217	0.5039660165424998	0.14602044535886416	2.4434024066626865	nan	0.4002713228425568	0.5997286771574301	0.4003093533283757	0.049998635077090264	0.9500013649229393	0.9370091448101227
218	0.5039660148254907	0.1459794223337345	2.4437775321150905	nan	0.40027134443034645	0.5997286555696404	0.4003093533283757	0.049998635077090264	0.9500013649229393	0.9370597902129274
219	0.5039660122890028	0.14593843009031582	2.444152692349692	nan	0.4002713763213739	0.5997286236786131	0.4003093533283757	0.049998635077090264	0.9500013649229393	0.9371103976138503
220	0.5039660088260197	0.14589746861282782	2.4445278861813673	nan	0.40027141986115555	0.5997285801388317	0.4003093533283757	0.049998635077090264	0.9500013649229393	0.9371609670323732
221	0.5039660043295255	0.14585653788549013	2.4449031124249663	nan	0.400271476395208	0.5997285236047795	0.4003093533283757	0.049998635077090264	0.9500013649229393	0.9372114984879778
222	0.5039659986925054	0.1458156378925225	2.445278369895301	nan	0.4002715472690477	0.5997284527309401	0.4003093533283757	0.049998635077090264	0.9500013649229393	0.9372619920001459
223	0.5039659918079444	0.14577476861814453	2.4456536574071626	nan	0.40027163382819125	0.5997283661717969	0.4003093533283757	0.049998635077090264	0.9500013649229393	0.9373124475883593
224	0.5039659835688296	0.14573393004657587	2.4460289737753103	nan	0.40027173741815514	0.5997282625818335	0.4003093533283757	0.049998635077090264	0.9500013649229393	0.9373628652720998
225	0.5039659738681482	0.14569312216203611	2.446404317814477	nan	0.4002718593844559	0.5997281406155334	0.4003093533283757	0.049998635077090264	0.9500013649229393	0.9374132450708491
226	0.5039659625988894	0.14565234494874524	2.446779688339376	nan	0.40027200107261013	0.5997279989273798	0.4003093533283757	0.049998635077090264	0.9500013649229393	0.9374635870040889
227	0.5039659496540434	0.14561159839092253	2.4471550841647014	nan	0.4002721638281343	0.5997278361718565	0.4003093533283757	0.049998635077090264	0.9500013649229393	0.9375138910913012
228	0.5039659349266024	0.14557088247278782	2.4475305041051243	nan	0.4002723489965449	0.5997276510034468	0.4003093533283757	0.049998635077090264	0.9500013649229393	0.9375641573519677
229	0.5039659183095605	0.14553019717856086	2.4479059469753066	nan	0.4002725579233585	0.5997274420766343	0.4003093533283757	0.049998635077090264	0.9500013649229393	0.9376143858055701
230	0.503965899695914	0.14548954249246127	2.4482814115898934	nan	0.40027279195409166	0.5997272080459024	0.4003093533283757	0.049998635077090264	0.9500013649229393	0.9376645764715902
231	0.5039658789786615	0.14544891839870855	2.4486568967635236	nan	0.4002730524342608	0.5997269475657346	0.4003093533283757	0.049998635077090264	0.9500013649229393	0.9377147293695098
232	0.5039658624350998	0.1454083289827932	2.4490324300262403	nan	0.4002732604386597	0.5997267395613116	0.4003093533283757	0.049998635077090264	0.9500013649229393	0.9377648394555442
233	0.503965849798584	0.1453677724027882	2.4494080253513992	nan	0.4002734193195315	0.5997265806804011	0.4003093533283757	0.049998635077090264	0.9500013649229393	0.9378149090036637
234	0.5039658377419386	0.14532724611940928	2.4497836712675207	nan	0.40027357090983934	0.5997264290900557	0.4003093533283757	0.049998635077090264	0.9500013649229393	0.937864941148768
235	0.5039658262548439	0.14528675011584324	2.450159367614523	nan	0.40027371533930156	0.5997262846605571	0.4003093533283757	0.049998635077090264	0.9500013649229393	0.937914935911614
236	0.5039658153269803	0.14524628437527665	2.450535114232335	nan	0.40027385273763644	0.599726147262187	0.4003093533283757	0.049998635077090264	0.9500013649229393	0.937964893312959
237	0.5039658049480285	0.14520584888089605	2.4509109109608946	nan	0.40027398323456237	0.5997260167652271	0.4003093533283757	0.049998635077090264	0.9500013649229393	0.9380148133735601
238	0.5039657951076694	0.14516544361588812	2.4512867576401467	nan	0.40027410695979765	0.5997258930399588	0.4003093533283757	0.049998635077090264	0.9500013649229393	0.9380646961141744
239	0.5039657857955838	0.14512506856343954	2.451662654110047	nan	0.4002742240430606	0.599725775956664	0.4003093533283757	0.049998635077090264	0.9500013649229393	0.9381145415555591
240	0.5039657770014531	0.14508472370673697	2.4520386002105594	nan	0.4002743346140697	0.5997256653856241	0.4003093533283757	0.049998635077090264	0.9500013649229393	0.9381643497184711
241	0.5039657687149585	0.14504440902896698	2.452414595781657	nan	0.4002744388025431	0.5997255611971211	0.4003093533283757	0.049998635077090264	0.9500013649229393	0.9382141206236676
242	0.5039657609257814	0.14500412451331623	2.4527906406633226	nan	0.4002745367381993	0.5997254632614362	0.4003093533283757	0.049998635077090264	0.9500013649229393	0.9382638542919057
243	0.5039657536236034	0.1449638701429713	2.4531667346955492	nan	0.4002746285507565	0.5997253714488513	0.4003093533283757	0.049998635077090264	0.9500013649229393	0.9383135507439427
244	0.5039657467981064	0.14492364590111906	2.453542877718335	nan	0.40027471436993317	0.599725285629648	0.4003093533283757	0.049998635077090264	0.9500013649229393	0.9383632100005355
245	0.5039657404389719	0.14488345177094575	2.453919069571696	nan	0.40027479432544755	0.5997252056741079	0.4003093533283757	0.049998635077090264	0.9500013649229393	0.9384128320824413
246	0.5039657345358821	0.14484328773563848	2.4542953100956515	nan	0.40027486854701805	0.5997251314525126	0.4003093533283757	0.049998635077090264	0.9500013649229393	0.9384624170104171
247	0.503965729078519	0.1448031537783835	2.454671599130231	nan	0.40027493716436297	0.5997250628351439	0.4003093533283757	0.049998635077090264	0.9500013649229393	0.9385119648052201
248	0.5039657240565647	0.14476304988236766	2.4550479365154763	nan	0.40027500030720065	0.5997249996922834	0.4003093533283757	0.049998635077090264	0.9500013649229393	0.9385614754876075
249	0.5039657194597015	0.14472297603077744	2.455424322091438	nan	0.40027505810524944	0.5997249418942127	0.4003093533283757	0.049998635077090264	0.9500013649229393	0.9386109490783363
250	0.5039657152776118	0.1446829322067995	2.455800755698177	nan	0.40027511068822763	0.5997248893112134	0.4003093533283757	0.049998635077090264	0.9500013649229393	0.9386603855981637
251	0.5039657114999779	0.14464291839362065	2.4561772371757655	nan	0.4002751581858537	0.5997248418135671	0.4003093533283757	0.049998635077090264	0.9500013649229393	0.9387097850678466
252	0.5039657081164826	0.1446029345744274	2.4565537663642827	nan	0.40027520072784584	0.5997247992715555	0.4003093533283757	0.049998635077090264	0.9500013649229393	0.9387591475081424
253	0.5039657051168083	0.14456298073240648	2.4569303431038216	nan	0.40027523844392243	0.5997247615554604	0.4003093533283757	0.049998635077090264	0.9500013649229393	0.938808472939808
254	0.5039657024906377	0.1445230568507444	2.4573069672344863	nan	0.4002752714638018	0.5997247285355631	0.4003093533283757	0.049998635077090264	0.9500013649229393	0.9388577613836006
255	0.5039657002276535	0.14448316291262775	2.4576836385963885	nan	0.4002752999172024	0.5997247000821456	0.4003093533283757	0.049998635077090264	0.9500013649229393	0.9389070128602772
256	0.5039656983175387	0.1444432989012434	2.4580603570296518	nan	0.4002753239338424	0.5997246760654893	0.4003093533283757	0.049998635077090264	0.9500013649229393	0.9389562273905951
257	0.5039656967499759	0.14440346479977773	2.4584371223744137	nan	0.4002753436434403	0.5997246563558759	0.4003093533283757	0.049998635077090264	0.9500013649229393	0.9390054049953114
258	0.5039656955146483	0.1443636605914176	2.458813934470819	nan	0.40027535917571433	0.5997246408235871	0.4003093533283757	0.049998635077090264	0.9500013649229393	0.939054545695183
259	0.5039656946012387	0.14432388625934955	2.4591907931590242	nan	0.4002753706603829	0.5997246293389045	0.4003093533283757	0.049998635077090264	0.9500013649229393	0.9391036495109671
260	0.5039656939994301	0.1442841417867602	2.4595676982792005	nan	0.40027537822716425	0.5997246217721097	0.4003093533283757	0.049998635077090264	0.9500013649229393	0.939152716463421
261	0.5039656936989056	0.14424442715683605	2.4599446496715265	nan	0.4002753820057768	0.5997246179934844	0.4003093533283757	0.049998635077090264	0.9500013649229393	0.9392017465733017
262	0.5039656936893483	0.14420474235276415	2.460321647176194	nan	0.4002753821259389	0.5997246178733103	0.4003093533283757	0.049998635077090264	0.9500013649229393	0.9392507398613661
263	0.5039656939604412	0.1441650873577307	2.460698690633408	nan	0.40027537871736885	0.5997246212818689	0.4003093533283757	0.049998635077090264	0.9500013649229393	0.9392996963483716
264	0.5039656945018677	0.1441254621549225	2.4610757798833838	nan	0.40027537190978496	0.5997246280894418	0.4003093533283757	0.049998635077090264	0.9500013649229393	0.9393486160550752
265	0.5039656953033108	0.14408586672752632	2.4614529147663475	nan	0.40027536183290563	0.5997246381663108	0.4003093533283757	0.049998635077090264	0.9500013649229393	0.939397499002234
266	0.5039656963544537	0.14404630105872862	2.461830095122541	nan	0.4002753486164492	0.5997246513827575	0.4003093533283757	0.049998635077090264	0.9500013649229393	0.9394463452106052
267	0.5039656976449797	0.14400676513171606	2.4622073207922144	nan	0.400275332390134	0.5997246676090636	0.4003093533283757	0.049998635077090264	0.9500013649229393	0.9394951547009458
268	0.5039656991645719	0.14396725892967532	2.4625845916156353	nan	0.4002753132836783	0.5997246867155106	0.4003093533283757	0.049998635077090264	0.9500013649229393	0.9395439274940129
269	0.5039657009029137	0.14392778243579296	2.462961907433077	nan	0.4002752914268006	0.5997247085723801	0.4003093533283757	0.049998635077090264	0.9500013649229393	0.9395926636105638
270	0.5039657028496883	0.14388833563325587	2.463339268084833	nan	0.40027526694921906	0.599724733049954	0.4003093533283757	0.049998635077090264	0.9500013649229393	0.9396413630713554
271	0.5039657049945789	0.1438489185052504	2.463716673411203	nan	0.4002752399806521	0.5997247600185137	0.4003093533283757	0.049998635077090264	0.9500013649229393	0.9396900258971449
272	0.5039657073272689	0.1438095310349633	2.464094123252506	nan	0.4002752106508181	0.599724789348341	0.4003093533283757	0.049998635077090264	0.9500013649229393	0.9397386521086893
273	0.5039657098374414	0.14377017320558116	2.46447161744907	nan	0.4002751790894354	0.5997248209097173	0.4003093533283757	0.049998635077090264	0.9500013649229393	0.939787241726746
274	0.5039657125147798	0.14373084500029065	2.464849155841237	nan	0.4002751454262222	0.5997248545729246	0.4003093533283757	0.049998635077090264	0.9500013649229393	0.9398357947720718
275	0.5039657153489674	0.14369154640227844	2.465226738269366	nan	0.400275109790897	0.5997248902082443	0.4003093533283757	0.049998635077090264	0.9500013649229393	0.939884311265424
276	0.5039657183296873	0.14365227739473108	2.4656043645738235	nan	0.40027507231317805	0.599724927685958	0.4003093533283757	0.049998635077090264	0.9500013649229393	0.9399327912275597
277	0.5039657214466228	0.14361303796083535	2.4659820345949948	nan	0.40027503312278373	0.5997249668763475	0.4003093533283757	0.049998635077090264	0.9500013649229393	0.9399812346792359
278	0.5039657246894572	0.14357382808377772	2.4663597481732795	nan	0.40027499234943237	0.5997250076496944	0.4003093533283757	0.049998635077090264	0.9500013649229393	0.9400296416412097
279	0.5039657280478738	0.14353464774674496	2.466737505149087	nan	0.40027495012284225	0.5997250498762802	0.4003093533283757	0.049998635077090264	0.9500013649229393	0.9400780121342385
280	0.5039657315115557	0.14349549693292374	2.467115305362845	nan	0.40027490657273185	0.5997250934263867	0.4003093533283757	0.049998635077090264	0.9500013649229393	0.940126346179079
281	0.503965735070186	0.1434563756255004	2.467493148654997	nan	0.4002748618288194	0.5997251381702955	0.4003093533283757	0.049998635077090264	0.9500013649229393	0.9401746437964886
282	0.5039657387134483	0.14341728380766194	2.4678710348659942	nan	0.4002748160208232	0.5997251839782882	0.4003093533283757	0.049998635077090264	0.9500013649229393	0.9402229050072243
283	0.5039657424310253	0.14337822146259493	2.468248963836311	nan	0.40027476927846173	0.5997252307206465	0.4003093533283757	0.049998635077090264	0.9500013649229393	0.9402711298320432
284	0.5039657462126006	0.1433391885734857	2.4686269354064327	nan	0.40027472173145323	0.599725278267652	0.4003093533283757	0.049998635077090264	0.9500013649229393	0.9403193182917026
285	0.5039657500478569	0.14330018512352127	2.4690049494168615	nan	0.40027467350951607	0.5997253264895863	0.4003093533283757	0.049998635077090264	0.9500013649229393	0.9403674704069593
286	0.5039657539264777	0.14326121109588807	2.4693830057081128	nan	0.4002746247423686	0.5997253752567312	0.4003093533283757	0.049998635077090264	0.9500013649229393	0.9404155861985707
287	0.5039657578381458	0.14322226647377279	2.4697611041207184	nan	0.4002745755597291	0.5997254244393682	0.4003093533283757	0.049998635077090264	0.9500013649229393	0.9404636656872937
288	0.5039657617725446	0.14318335124036208	2.470139244495228	nan	0.400274526091316	0.599725473907779	0.4003093533283757	0.049998635077090264	0.9500013649229393	0.9405117088938855
289	0.5039657657193569	0.1431444653788425	2.470517426672207	nan	0.40027447646684755	0.5997255235322452	0.4003093533283757	0.049998635077090264	0.9500013649229393	0.9405597158391032
290	0.5039657696682658	0.14310560887240076	2.470895650492235	nan	0.40027442681604214	0.5997255731830483	0.4003093533283757	0.049998635077090264	0.9500013649229393	0.9406076865437041
291	0.5039657736089544	0.1430667817042236	2.4712739157959076	nan	0.40027437726861814	0.5997256227304703	0.4003093533283757	0.049998635077090264	0.9500013649229393	0.9406556210284449
292	0.5039657775311057	0.14302798385749738	2.4716522224238417	nan	0.4002743279542938	0.5997256720447925	0.4003093533283757	0.049998635077090264	0.9500013649229393	0.9407035193140831
293	0.5039657814244027	0.14298921531540898	2.472030570216666	nan	0.40027427900278756	0.5997257209962968	0.4003093533283757	0.049998635077090264	0.9500013649229393	0.9407513814213756
294	0.5039657852785283	0.14295047606114497	2.472408959015029	nan	0.40027423054381767	0.5997257694552647	0.4003093533283757	0.049998635077090264	0.9500013649229393	0.9407992073710796
295	0.5039657890831654	0.14291176607789202	2.4727873886595955	nan	0.4002741827071025	0.5997258172919777	0.4003093533283757	0.049998635077090264	0.9500013649229393	0.9408469971839521
296	0.503965792827997	0.14287308534883658	2.473165858991047	nan	0.40027413562236047	0.5997258643767178	0.4003093533283757	0.049998635077090264	0.9500013649229393	0.9408947508807505
297	0.503965796502706	0.14283443385716554	2.473544369850085	nan	0.4002740894193098	0.5997259105797663	0.4003093533283757	0.049998635077090264	0.9500013649229393	0.9409424684822315
298	0.5039658000969752	0.14279581158606536	2.4739229210774276	nan	0.4002740442276689	0.5997259557714051	0.4003093533283757	0.049998635077090264	0.9500013649229393	0.9409901500091525
299	0.5039658036004877	0.1427572185187228	2.474301512513808	nan	0.40027400017715603	0.5997259998219157	0.4003093533283757	0.049998635077090264	0.9500013649229393	0.9410377954822705
300	0.503965807002926	0.14271865463832434	2.4746801439999855	nan	0.40027395739748967	0.5997260426015796	0.4003093533283757	0.049998635077090264	0.9500013649229393	0.9410854049223427
301	0.5039658102939734	0.14268011992805674	2.4750588153767303	nan	0.400273916018388	0.5997260839806787	0.4003093533283757	0.049998635077090264	0.9500013649229393	0.9411329783501262
302	0.5039658134633123	0.14264161437110667	2.475437526484834	nan	0.4002738761695695	0.5997261238294946	0.4003093533283757	0.049998635077090264	0.9500013649229393	0.941180515786378
303	0.5039658165006258	0.1426031379506607	2.4758162771651087	nan	0.40027383798075244	0.5997261620183089	0.4003093533283757	0.049998635077090264	0.9500013649229393	0.9412280172518552
304	0.5039658193955965	0.1425646906499054	2.4761950672583835	nan	0.40027380158165515	0.599726198417403	0.4003093533283757	0.049998635077090264	0.9500013649229393	0.9412754827673152
305	0.5039658221379073	0.14252627245202765	2.4765738966055073	nan	0.400273767101996	0.5997262328970591	0.4003093533283757	0.049998635077090264	0.9500013649229393	0.9413229123535147
306	0.5039658247172412	0.14248788334021378	2.4769527650473497	nan	0.40027373467149335	0.5997262653275582	0.4003093533283757	0.049998635077090264	0.9500013649229393	0.9413703060312112
307	0.5039658271232805	0.1424495232976506	2.4773316724248007	nan	0.40027370441986543	0.5997262955791824	0.4003093533283757	0.049998635077090264	0.9500013649229393	0.9414176638211615
308	0.5039658293457085	0.14241119230752475	2.477710618578768	nan	0.4002736764768307	0.5997263235222132	0.4003093533283757	0.049998635077090264	0.9500013649229393	0.941464985744123
309	0.5039658313742077	0.1423728903530228	2.4780896033501802	nan	0.4002736509721075	0.5997263490269321	0.4003093533283757	0.049998635077090264	0.9500013649229393	0.9415122718208525
310	0.503965833198461	0.14233461741733133	2.47846862657999	nan	0.40027362803541405	0.599726371963621	0.4003093533283757	0.049998635077090264	0.9500013649229393	0.9415595220721074
311	0.5039658348081512	0.14229637348363722	2.4788476881091652	nan	0.4002736077964688	0.5997263922025614	0.4003093533283757	0.049998635077090264	0.9500013649229393	0.9416067365186446
312	0.503965836192961	0.1422581585351269	2.4792267877787006	nan	0.40027359038499005	0.5997264096140349	0.4003093533283757	0.049998635077090264	0.9500013649229393	0.9416539151812212
313	0.5039658373425733	0.14221997255498697	2.479605925429609	nan	0.4002735759306961	0.5997264240683232	0.4003093533283757	0.049998635077090264	0.9500013649229393	0.9417010580805946
314	0.503965838246671	0.1421818155264043	2.4799851009029243	nan	0.40027356456330543	0.5997264354357079	0.4003093533283757	0.049998635077090264	0.9500013649229393	0.9417481652375216
315	0.5039658388949368	0.14214368743256522	2.4803643140397025	nan	0.4002735564125362	0.5997264435864708	0.4003093533283757	0.049998635077090264	0.9500013649229393	0.9417952366727594
316	0.5039658392770537	0.14210558825665676	2.480743564681023	nan	0.40027355160810685	0.5997264483908932	0.4003093533283757	0.049998635077090264	0.9500013649229393	0.9418422724070652
317	0.5039658393827046	0.14206751798186512	2.481122852667988	nan	0.4002735502797357	0.599726449719257	0.4003093533283757	0.049998635077090264	0.9500013649229393	0.941889272461196
318	0.5039658392015722	0.14202947659137732	2.481502177841721	nan	0.40027355255714114	0.5997264474418439	0.4003093533283757	0.049998635077090264	0.9500013649229393	0.941936236855909
319	0.5039658387233399	0.1419914640683796	2.481881540043367	nan	0.40027355857004143	0.5997264414289354	0.4003093533283757	0.049998635077090264	0.9500013649229393	0.9419831656119614
320	0.5039658379376902	0.14195348039605904	2.482260939114096	nan	0.4002735684481549	0.5997264315508132	0.4003093533283757	0.049998635077090264	0.9500013649229393	0.94203005875011
321	0.5039658368343064	0.1419155255576019	2.4826403748951025	nan	0.4002735823212	0.5997264176777588	0.4003093533283757	0.049998635077090264	0.9500013649229393	0.9420769162911122
322	0.5039658354028715	0.14187759953619505	2.4830198472276024	nan	0.400273600318895	0.599726399680054	0.4003093533283757	0.049998635077090264	0.9500013649229393	0.942123738255725
323	0.5039658336330688	0.14183970231502507	2.483399355952833	nan	0.4002736225709582	0.5997263774279804	0.4003093533283757	0.049998635077090264	0.9500013649229393	0.9421705246647055
324	0.5039658315145812	0.14180183387727863	2.483778900912063	nan	0.400273649207108	0.5997263507918197	0.4003093533283757	0.049998635077090264	0.9500013649229393	0.9422172755388109
325	0.5039658290370921	0.14176399420614216	2.484158481946581	nan	0.40027368035706273	0.5997263196418534	0.4003093533283757	0.049998635077090264	0.9500013649229393	0.9422639908987982
326	0.5039658261902846	0.14172618328480246	2.4845380988977004	nan	0.4002737161505407	0.5997262838483632	0.4003093533283757	0.049998635077090264	0.9500013649229393	0.9423106707654246
327	0.5039658229638423	0.14168840109644631	2.4849177516067575	nan	0.4002737567172603	0.5997262432816308	0.4003093533283757	0.049998635077090264	0.9500013649229393	0.9423573151594472
328	0.5039658193474486	0.14165064762426016	2.4852974399151186	nan	0.4002738021869398	0.5997261978119378	0.4003093533283757	0.049998635077090264	0.9500013649229393	0.942403924101623
329	0.5039658153307867	0.14161292285143057	2.485677163664172	nan	0.4002738526892976	0.5997261473095659	0.4003093533283757	0.049998635077090264	0.9500013649229393	0.9424504976127093
330	0.5039658109035405	0.14157522676114442	2.4860569226953357	nan	0.400273908354052	0.5997260916447966	0.4003093533283757	0.049998635077090264	0.9500013649229393	0.942497035713463
331	0.5039658060553935	0.14153755933658807	2.486436716850048	nan	0.40027396931092135	0.5997260306879116	0.4003093533283757	0.049998635077090264	0.9500013649229393	0.9425435384246414
332	0.5039658007760296	0.1414999205609484	2.486816545969777	nan	0.40027403568962405	0.5997259643091927	0.4003093533283757	0.049998635077090264	0.9500013649229393	0.9425900057670016
333	0.5039657950551325	0.14146231041741197	2.4871964098960175	nan	0.40027410761987836	0.5997258923789212	0.4003093533283757	0.049998635077090264	0.9500013649229393	0.9426364377613006
334	0.5039657888823862	0.14142472888916535	2.4875763084702927	nan	0.4002741852314026	0.5997258147673791	0.4003093533283757	0.049998635077090264	0.9500013649229393	0.9426828344282955
335	0.5039657822474748	0.14138717595939532	2.4879562415341487	nan	0.40027426865391524	0.5997257313448477	0.4003093533283757	0.049998635077090264	0.9500013649229393	0.9427291957887435
336	0.5039657751400826	0.14134965161128832	2.488336208929163	nan	0.40027435801713446	0.5997256419816089	0.4003093533283757	0.049998635077090264	0.9500013649229393	0.9427755218634016
337	0.5039657675498935	0.14131215582803114	2.48871621049694	nan	0.4002744534507787	0.5997255465479444	0.4003093533283757	0.049998635077090264	0.9500013649229393	0.9428218126730272
338	0.5039657594665924	0.14127468859281034	2.48909624607911	nan	0.40027455508456633	0.5997254449141356	0.4003093533283757	0.049998635077090264	0.9500013649229393	0.9428680682383771
339	0.5039657508798636	0.1412372498888126	2.4894763155173356	nan	0.4002746630482156	0.5997253369504643	0.4003093533283757	0.049998635077090264	0.9500013649229393	0.9429142885802085
340	0.5039657417793918	0.14119983969922456	2.4898564186533045	nan	0.40027477747144485	0.5997252225272119	0.4003093533283757	0.049998635077090264	0.9500013649229393	0.9429604737192786
341	0.5039657321548618	0.14116245800723282	2.4902365553287362	nan	0.4002748984839725	0.5997251015146604	0.4003093533283757	0.049998635077090264	0.9500013649229393	0.9430066236763444
342	0.5039657219959589	0.14112510479602403	2.4906167253853786	nan	0.4002750262155168	0.5997249737830912	0.4003093533283757	0.049998635077090264	0.9500013649229393	0.9430527384721631
343	0.5039657112923679	0.14108778004878486	2.490996928665008	nan	0.40027516079579617	0.5997248392027861	0.4003093533283757	0.049998635077090264	0.9500013649229393	0.9430988181274917
344	0.5039657000337743	0.14105048374870188	2.4913771650094345	nan	0.4002753023545289	0.5997246976440265	0.4003093533283757	0.049998635077090264	0.9500013649229393	0.9431448626630875
345	0.5039656882098635	0.14101321587896176	2.4917574342604913	nan	0.40027545102143336	0.5997245489770943	0.4003093533283757	0.049998635077090264	0.9500013649229393	0.9431908720997074
346	0.5039656758103213	0.14097597642275117	2.49213773626005	nan	0.4002756069262279	0.5997243930722709	0.4003093533283757	0.049998635077090264	0.9500013649229393	0.9432368464581087
347	0.5039656628248333	0.14093876536325667	2.492518070850008	nan	0.40027577019863075	0.5997242297998382	0.4003093533283757	0.049998635077090264	0.9500013649229393	0.9432827857590483
348	0.503965649243086	0.14090158268366515	2.492898437872298	nan	0.4002759409683604	0.5997240590300776	0.4003093533283757	0.049998635077090264	0.9500013649229393	0.9433286900232835
349	0.5039656350547652	0.14086442836716284	2.49327883716888	nan	0.4002761193651351	0.599723880633271	0.4003093533283757	0.049998635077090264	0.9500013649229393	0.9433745592715713
350	0.5039656202495577	0.14082730239693664	2.493659268581748	nan	0.4002763055186732	0.5997236944796998	0.4003093533283757	0.049998635077090264	0.9500013649229393	0.9434203935246689
351	0.5039656048171501	0.1407902047561732	2.49403973195293	nan	0.40027649955869304	0.5997235004396456	0.4003093533283757	0.049998635077090264	0.9500013649229393	0.9434661928033333
352	0.5039655887472293	0.140753135428059	2.4944202271244817	nan	0.400276701614913	0.5997232983833903	0.4003093533283757	0.049998635077090264	0.9500013649229393	0.9435119571283218
353	0.5039655720294824	0.1407160943957807	2.494800753938499	nan	0.4002769118170514	0.5997230881812154	0.4003093533283757	0.049998635077090264	0.9500013649229393	0.9435576865203914
354	0.503965554653597	0.14067908164252507	2.4951813122371025	nan	0.40027713029482653	0.5997228697034026	0.4003093533283757	0.049998635077090264	0.9500013649229393	0.9436033810002992
355	0.5039655366092606	0.1406420971514788	2.4955619018624526	nan	0.4002773571779568	0.5997226428202335	0.4003093533283757	0.049998635077090264	0.9500013649229393	0.9436490405888022
356	0.5039655178861611	0.1406051409058282	2.4959425226567413	nan	0.4002775925961605	0.5997224074019897	0.4003093533283757	0.049998635077090264	0.9500013649229393	0.9436946653066577
357	0.5039654984739866	0.1405682128887603	2.4963231744621943	nan	0.400277836679156	0.5997221633189529	0.4003093533283757	0.049998635077090264	0.9500013649229393	0.9437402551746227
358	0.5039654783624258	0.14053131308346145	2.4967038571210747	nan	0.40027808955666166	0.5997219104414047	0.4003093533283757	0.049998635077090264	0.9500013649229393	0.9437858102134544
359	0.5039654575411674	0.1404944414731184	2.4970845704756757	nan	0.40027835135839573	0.5997216486396266	0.4003093533283757	0.049998635077090264	0.9500013649229393	0.9438313304439099
360	0.5039654359999003	0.14045759804091784	2.4974653143683305	nan	0.4002786222140766	0.5997213777839006	0.4003093533283757	0.049998635077090264	0.9500013649229393	0.9438768158867462
361	0.5039654137283139	0.14042078277004622	2.4978460886414062	nan	0.4002789022534227	0.5997210977445081	0.4003093533283757	0.049998635077090264	0.9500013649229393	0.9439222665627206
362	0.503965390716098	0.1403839956436903	2.4982268931373044	nan	0.4002791916061522	0.5997208083917307	0.4003093533283757	0.049998635077090264	0.9500013649229393	0.94396768249259
363	0.5039653669529426	0.1403472366450368	2.4986077276984657	nan	0.4002794904019836	0.5997205095958502	0.4003093533283757	0.049998635077090264	0.9500013649229393	0.9440130636971117
364	0.5039653424285377	0.14031050575727233	2.498988592167364	nan	0.40027979877063513	0.5997202012271481	0.4003093533283757	0.049998635077090264	0.9500013649229393	0.9440584101970426
365	0.5039653171325744	0.14027380296358327	2.499369486386514	nan	0.4002801168418252	0.5997198831559061	0.4003093533283757	0.049998635077090264	0.9500013649229393	0.9441037220131401
366	0.5039652910547436	0.14023712824715662	2.499750410198465	nan	0.4002804447452721	0.5997195552524058	0.4003093533283757	0.049998635077090264	0.9500013649229393	0.944148999166161
367	0.5039652641847365	0.14020048159117882	2.5001313634458064	nan	0.4002807826106941	0.599719217386929	0.4003093533283757	0.049998635077090264	0.9500013649229393	0.9441942416768627
368	0.5039652365122451	0.14016386297883654	2.5005123459711625	nan	0.40028113056780973	0.5997188694297572	0.4003093533283757	0.049998635077090264	0.9500013649229393	0.9442394495660021
369	0.5039652080269615	0.14012727239331635	2.5008933576172003	nan	0.4002814887463372	0.5997185112511719	0.4003093533283757	0.049998635077090264	0.9500013649229393	0.9442846228543365
370	0.5039651787185783	0.14009070981780503	2.501274398226621	nan	0.40028185727599486	0.5997181427214551	0.4003093533283757	0.049998635077090264	0.9500013649229393	0.9443297615626227
371	0.5039651485767883	0.14005417523548913	2.5016554676421707	nan	0.40028223628650106	0.5997177637108881	0.4003093533283757	0.049998635077090264	0.9500013649229393	0.9443748657116182
372	0.503965117591285	0.14001766862955534	2.5020365657066277	nan	0.40028262590757413	0.5997173740897528	0.4003093533283757	0.049998635077090264	0.9500013649229393	0.9444199353220798
373	0.5039650857517621	0.1399811899831902	2.502417692262817	nan	0.4002830262689325	0.5997169737283307	0.4003093533283757	0.049998635077090264	0.9500013649229393	0.9444649704147648
374	0.5039650530479141	0.1399447392795804	2.502798847153601	nan	0.4002834375002943	0.5997165624969034	0.4003093533283757	0.049998635077090264	0.9500013649229393	0.9445099710104302
375	0.5039650194694354	0.1399083165019126	2.503180030221885	nan	0.40028385973137814	0.5997161402657526	0.4003093533283757	0.049998635077090264	0.9500013649229393	0.9445549371298333
376	0.5039649850060213	0.13987192163337347	2.50356124131061	nan	0.40028429309190217	0.59971570690516	0.4003093533283757	0.049998635077090264	0.9500013649229393	0.9445998687937309
377	0.5039649496473674	0.13983555465714947	2.503942480262766	nan	0.40028473771158474	0.5997152622854072	0.4003093533283757	0.049998635077090264	0.9500013649229393	0.9446447660228804
378	0.5039649133831698	0.13979921555642738	2.5043237469213784	nan	0.40028519372014426	0.5997148062767758	0.4003093533283757	0.049998635077090264	0.9500013649229393	0.9446896288380389
379	0.5039648762031252	0.13976290431439387	2.5047050411295197	nan	0.4002856612472991	0.5997143387495474	0.4003093533283757	0.049998635077090264	0.9500013649229393	0.9447344572599632
380	0.5039648380969307	0.1397266209142356	2.5050863627303013	nan	0.40028614042276744	0.5997138595740038	0.4003093533283757	0.049998635077090264	0.9500013649229393	0.9447792513094107
381	0.5039647990542838	0.13969036533913903	2.505467711566882	nan	0.4002866313762678	0.5997133686204265	0.4003093533283757	0.049998635077090264	0.9500013649229393	0.9448240110071384
382	0.5039647590648828	0.13965413757229095	2.505849087482459	nan	0.4002871342375184	0.5997128657590972	0.4003093533283757	0.049998635077090264	0.9500013649229393	0.9448687363739036
383	0.5039647181184265	0.1396179375968779	2.5062304903202763	nan	0.40028764913623766	0.5997123508602975	0.4003093533283757	0.049998635077090264	0.9500013649229393	0.9449134274304631
384	0.503964676204614	0.13958176539608658	2.506611919923622	nan	0.40028817620214385	0.5997118237943091	0.4003093533283757	0.049998635077090264	0.9500013649229393	0.9449580841975742
385	0.5039646333131452	0.13954562095310363	2.5069933761358323	nan	0.4002887155649553	0.5997112844314136	0.4003093533283757	0.049998635077090264	0.9500013649229393	0.9450027066959941
386	0.5039645894337207	0.13950950425111563	2.5073748588002784	nan	0.40028926735439047	0.5997107326418927	0.4003093533283757	0.049998635077090264	0.9500013649229393	0.9450472949464797
387	0.5039645445560412	0.13947341527330936	2.507756367760388	nan	0.4002898317001676	0.599710168296028	0.4003093533283757	0.049998635077090264	0.9500013649229393	0.9450918489697882
388	0.5039644986698086	0.13943735400287127	2.5081379028596293	nan	0.400290408732005	0.599709591264101	0.4003093533283757	0.049998635077090264	0.9500013649229393	0.9451363687866767
389	0.5039644517647252	0.13940132042298814	2.508519463941517	nan	0.4002909985796211	0.5997090014163936	0.4003093533283757	0.049998635077090264	0.9500013649229393	0.9451808544179023
390	0.5039644038304936	0.13936531451684642	2.508901050849615	nan	0.4002916013727342	0.5997083986231873	0.4003093533283757	0.049998635077090264	0.9500013649229393	0.9452253058842223
391	0.5039643548568175	0.139329336267633	2.5092826634275314	nan	0.40029221724106256	0.5997077827547637	0.4003093533283757	0.049998635077090264	0.9500013649229393	0.9452697232063936
392	0.503964304833401	0.13929338565853433	2.5096643015189235	nan	0.40029284631432466	0.5997071536814045	0.4003093533283757	0.049998635077090264	0.9500013649229393	0.9453141064051733
393	0.5039642537499492	0.1392574626727371	2.510045964967497	nan	0.40029348872223874	0.5997065112733914	0.4003093533283757	0.049998635077090264	0.9500013649229393	0.9453584555013187
394	0.5039642015961675	0.13922156729342794	2.510427653617003	nan	0.4002941445945232	0.5997058554010058	0.4003093533283757	0.049998635077090264	0.9500013649229393	0.9454027705155867
395	0.5039641483617623	0.13918569950379356	2.5108093673112455	nan	0.4002948140608964	0.5997051859345297	0.4003093533283757	0.049998635077090264	0.9500013649229393	0.9454470514687345
396	0.5039640940364403	0.1391498592870205	2.511191105894076	nan	0.4002954972510766	0.5997045027442445	0.4003093533283757	0.049998635077090264	0.9500013649229393	0.9454912983815194
397	0.5039640386099093	0.13911404662629556	2.511572869209396	nan	0.4002961942947822	0.5997038057004319	0.4003093533283757	0.049998635077090264	0.9500013649229393	0.945535511274698
398	0.503963982071878	0.13907826150480518	2.511954657101156	nan	0.40029690532173146	0.5997030946733735	0.4003093533283757	0.049998635077090264	0.9500013649229393	0.945579690169028
399	0.5039639244120555	0.13904250390573591	2.51233646941336	nan	0.4002976304616428	0.599702369533351	0.4003093533283757	0.049998635077090264	0.9500013649229393	0.9456238350852663
400	0.5039638656201516	0.13900677381227466	2.5127183059900586	nan	0.40029836984423456	0.599701630150646	0.4003093533283757	0.049998635077090264	0.9500013649229393	0.9456679460441698
401	0.5039638056858773	0.1389710712076081	2.5131001666753567	nan	0.40029912359922504	0.5997008763955403	0.4003093533283757	0.049998635077090264	0.9500013649229393	0.9457120230664958
402	0.503963744598944	0.13893539607492256	2.513482051313413	nan	0.4002998918563326	0.5997001081383152	0.4003093533283757	0.049998635077090264	0.9500013649229393	0.9457560661730015
403	0.5039637070549804	0.1388997533433437	2.5138641647347324	nan	0.40030036402926383	0.5996996359653118	0.4003093533283757	0.049998635077090264	0.9500013649229393	0.9458000692783836
404	0.5039637070549804	0.13886414549551673	2.514246626154665	nan	0.40030036402926383	0.5996996359653118	0.4003093533283757	0.049998635077090264	0.9500013649229393	0.9458440293176665
405	0.5039637070549804	0.1388285648657116	2.5146291253818553	nan	0.40030036402926383	0.5996996359653118	0.4003093533283757	0.049998635077090264	0.9500013649229393	0.9458879557546572
406	0.5039637070549804	0.1387930114362259	2.5150116623830394	nan	0.40030036402926383	0.5996996359653118	0.4003093533283757	0.049998635077090264	0.9500013649229393	0.9459318486112104
407	0.5039637070549804	0.13875748518935727	2.5153942371250375	nan	0.40030036402926383	0.5996996359653118	0.4003093533283757	0.049998635077090264	0.9500013649229393	0.9459757079091806
408	0.5039637070549804	0.13872198610740338	2.515776849574758	nan	0.40030036402926383	0.5996996359653118	0.4003093533283757	0.049998635077090264	0.9500013649229393	0.9460195336704225
409	0.5039637070549804	0.13868651417266187	2.516159499699194	nan	0.40030036402926383	0.5996996359653118	0.4003093533283757	0.049998635077090264	0.9500013649229393	0.9460633259167907
410	0.5039637070549804	0.13865106936743044	2.516542187465432	nan	0.40030036402926383	0.5996996359653118	0.4003093533283757	0.049998635077090264	0.9500013649229393	0.9461070846701398
411	0.5039637070549804	0.13861565167400636	2.51692491284064	nan	0.40030036402926383	0.5996996359653118	0.4003093533283757	0.049998635077090264	0.9500013649229393	0.9461508099523247
412	0.5039637070549804	0.13858026107468768	2.517307675792078	nan	0.40030036402926383	0.5996996359653118	0.4003093533283757	0.049998635077090264	0.9500013649229393	0.9461945017851998
413	0.5039637070549804	0.1385448975517718	2.517690476287096	nan	0.40030036402926383	0.5996996359653118	0.4003093533283757	0.049998635077090264	0.9500013649229393	0.9462381601906199
414	0.5039637070549804	0.13850956108755652	2.5180733142931286	nan	0.40030036402926383	0.5996996359653118	0.4003093533283757	0.049998635077090264	0.9500013649229393	0.9462817851904395
415	0.5039637070549804	0.13847425166433924	2.518456189777705	nan	0.40030036402926383	0.5996996359653118	0.4003093533283757	0.049998635077090264	0.9500013649229393	0.9463253768065133
416	0.5039637070549804	0.13843896926441768	2.5188391027084425	nan	0.40030036402926383	0.5996996359653118	0.4003093533283757	0.049998635077090264	0.9500013649229393	0.9463689350606961
417	0.5039637070549804	0.13840371387008965	2.5192220530530447	nan	0.40030036402926383	0.5996996359653118	0.4003093533283757	0.049998635077090264	0.9500013649229393	0.9464124599748422
418	0.5039637070549804	0.13836848546365255	2.5196050407793136	nan	0.40030036402926383	0.5996996359653118	0.4003093533283757	0.049998635077090264	0.9500013649229393	0.9464559515708066
419	0.5039637070549804	0.13833328402740408	2.5199880658551352	nan	0.40030036402926383	0.5996996359653118	0.4003093533283757	0.049998635077090264	0.9500013649229393	0.9464994098704438
420	0.5039637070549804	0.13829810954364186	2.52037112824849	nan	0.40030036402926383	0.5996996359653118	0.4003093533283757	0.049998635077090264	0.9500013649229393	0.9465428348956084
421	0.5039637070549804	0.1382629619946636	2.5207542279274513	nan	0.40030036402926383	0.5996996359653118	0.4003093533283757	0.049998635077090264	0.9500013649229393	0.9465862266681552
422	0.5039637070549804	0.13822784136276678	2.5211373648601834	nan	0.40030036402926383	0.5996996359653118	0.4003093533283757	0.049998635077090264	0.9500013649229393	0.9466295852099387
423	0.5039637070549804	0.13819274763024914	2.521520539014941	nan	0.40030036402926383	0.5996996359653118	0.4003093533283757	0.049998635077090264	0.9500013649229393	0.9466729105428136
424	0.5039637070549804	0.13815768077940827	2.5219037503600754	nan	0.40030036402926383	0.5996996359653118	0.4003093533283757	0.049998635077090264	0.9500013649229393	0.9467162026886344
425	0.5039637070549804	0.13812264079254177	2.522286998864028	nan	0.40030036402926383	0.5996996359653118	0.4003093533283757	0.049998635077090264	0.9500013649229393	0.9467594616692561
426	0.5039637070549804	0.13808762765194738	2.5226702844953373	nan	0.40030036402926383	0.5996996359653118	0.4003093533283757	0.049998635077090264	0.9500013649229393	0.946802687506533
427	0.5039637070549804	0.13805264133992268	2.523053607222632	nan	0.40030036402926383	0.5996996359653118	0.4003093533283757	0.049998635077090264	0.9500013649229393	0.9468458802223199
428	0.5039637070549804	0.13801768183876528	2.5234369670146384	nan	0.40030036402926383	0.5996996359653118	0.4003093533283757	0.049998635077090264	0.9500013649229393	0.9468890398384714
429	0.5039637070549804	0.1379827491307728	2.5238203638401764	nan	0.40030036402926383	0.5996996359653118	0.4003093533283757	0.049998635077090264	0.9500013649229393	0.9469321663768422
430	0.5039637070549804	0.13794784319824283	2.52420379766816	nan	0.40030036402926383	0.5996996359653118	0.4003093533283757	0.049998635077090264	0.9500013649229393	0.9469752598592869
431	0.5039637070549804	0.13791296402347308	2.5245872684675996	nan	0.40030036402926383	0.5996996359653118	0.4003093533283757	0.049998635077090264	0.9500013649229393	0.9470183203076601
432	0.5039637070549804	0.13787811158876118	2.524970776207603	nan	0.40030036402926383	0.5996996359653118	0.4003093533283757	0.049998635077090264	0.9500013649229393	0.9470613477438166
433	0.5039637070549804	0.1378432858764046	2.5253543208573737	nan	0.40030036402926383	0.5996996359653118	0.4003093533283757	0.049998635077090264	0.9500013649229393	0.9471043421896109
434	0.5039637070549804	0.13780848686870117	2.5257379023862088	nan	0.40030036402926383	0.5996996359653118	0.4003093533283757	0.049998635077090264	0.9500013649229393	0.9471473036668977
435	0.5039637070549804	0.1377737145479485	2.526121520763506	nan	0.40030036402926383	0.5996996359653118	0.4003093533283757	0.049998635077090264	0.9500013649229393	0.9471902321975316
436	0.5039637070549804	0.1377389688964441	2.5265051759587616	nan	0.40030036402926383	0.5996996359653118	0.4003093533283757	0.049998635077090264	0.9500013649229393	0.9472331278033674
437	0.5039637070549804	0.13770424989648566	2.526888867941566	nan	0.40030036402926383	0.5996996359653118	0.4003093533283757	0.049998635077090264	0.9500013649229393	0.9472759905062597
438	0.5039637070549804	0.1376695575303708	2.52727259668161	nan	0.40030036402926383	0.5996996359653118	0.4003093533283757	0.049998635077090264	0.9500013649229393	0.9473188203280629
439	0.5039637070549804	0.13763489178039723	2.527656362148683	nan	0.40030036402926383	0.5996996359653118	0.4003093533283757	0.049998635077090264	0.9500013649229393	0.947361617290632
440	0.5039637070549804	0.13760025262886244	2.5280401643126718	nan	0.40030036402926383	0.5996996359653118	0.4003093533283757	0.049998635077090264	0.9500013649229393	0.9474043814158213
441	0.5039637070549804	0.13756564005806415	2.5284240031435674	nan	0.40030036402926383	0.5996996359653118	0.4003093533283757	0.049998635077090264	0.9500013649229393	0.9474471127254858
442	0.5039637070549804	0.13753105405029997	2.528807878611455	nan	0.40030036402926383	0.5996996359653118	0.4003093533283757	0.049998635077090264	0.9500013649229393	0.9474898112414798
443	0.5039637070549804	0.1374964945878675	2.5291917906865233	nan	0.40030036402926383	0.5996996359653118	0.4003093533283757	0.049998635077090264	0.9500013649229393	0.9475324769856582
444	0.5039637070549804	0.13746196165306446	2.5295757393390605	nan	0.40030036402926383	0.5996996359653118	0.4003093533283757	0.049998635077090264	0.9500013649229393	0.9475751099798756
445	0.5039637070549804	0.13742745522818833	2.529959724539456	nan	0.40030036402926383	0.5996996359653118	0.4003093533283757	0.049998635077090264	0.9500013649229393	0.9476177102459865
446	0.5039637070549804	0.13739297529553696	2.5303437462582012	nan	0.40030036402926383	0.5996996359653118	0.4003093533283757	0.049998635077090264	0.9500013649229393	0.9476602778058457
447	0.5039637070549804	0.1373585218374076	2.530727804465891	nan	0.40030036402926383	0.5996996359653118	0.4003093533283757	0.049998635077090264	0.9500013649229393	0.947702812681308
448	0.5039637070549804	0.1373240948360983	2.531111899133217	nan	0.40030036402926383	0.5996996359653118	0.4003093533283757	0.049998635077090264	0.9500013649229393	0.9477453148942276
449	0.5039637070549804	0.13728969427390647	2.5314960302309792	nan	0.40030036402926383	0.5996996359653118	0.4003093533283757	0.049998635077090264	0.9500013649229393	0.9477877844664595
450	0.5039637070549804	0.1372553201331298	2.5318801977300787	nan	0.40030036402926383	0.5996996359653118	0.4003093533283757	0.049998635077090264	0.9500013649229393	0.9478302214198582
451	0.5039637070549804	0.1372209723960659	2.5322644016015188	nan	0.40030036402926383	0.5996996359653118	0.4003093533283757	0.049998635077090264	0.9500013649229393	0.9478726257762784
452	0.5039637070549804	0.13718665104501238	2.532648641816409	nan	0.40030036402926383	0.5996996359653118	0.4003093533283757	0.049998635077090264	0.9500013649229393	0.9479149975575747
453	0.5039637070549804	0.13715235606226683	2.5330329183459623	nan	0.40030036402926383	0.5996996359653118	0.4003093533283757	0.049998635077090264	0.9500013649229393	0.9479573367856019
454	0.5039637070549804	0.137118087430127	2.5334172311614944	nan	0.40030036402926383	0.5996996359653118	0.4003093533283757	0.049998635077090264	0.9500013649229393	0.9479996434822144
455	0.5039637070549804	0.13708384513089045	2.533801580234429	nan	0.40030036402926383	0.5996996359653118	0.4003093533283757	0.049998635077090264	0.9500013649229393	0.948041917669267
456	0.5039637070549804	0.1370496291468548	2.5341859655362926	nan	0.40030036402926383	0.5996996359653118	0.4003093533283757	0.049998635077090264	0.9500013649229393	0.9480841593686143
457	0.5039637070549804	0.1370154394603177	2.5345703870387215	nan	0.40030036402926383	0.5996996359653118	0.4003093533283757	0.049998635077090264	0.9500013649229393	0.9481263686021111
458	0.5039637070549804	0.1369812760535768	2.534954844713453	nan	0.40030036402926383	0.5996996359653118	0.4003093533283757	0.049998635077090264	0.9500013649229393	0.9481685453916118
459	0.5039637070549804	0.13694713890892962	2.535339338532336	nan	0.40030036402926383	0.5996996359653118	0.4003093533283757	0.049998635077090264	0.9500013649229393	0.9482106897589712
460	0.5039637070549804	0.1369130280086739	2.535723868467323	nan	0.40030036402926383	0.5996996359653118	0.4003093533283757	0.049998635077090264	0.9500013649229393	0.9482528017260439
461	0.5039637070549804	0.1368789433351072	2.536108434490477	nan	0.40030036402926383	0.5996996359653118	0.4003093533283757	0.049998635077090264	0.9500013649229393	0.9482948813146845
462	0.5039637070549804	0.13684488487052726	2.536493036573966	nan	0.40030036402926383	0.5996996359653118	0.4003093533283757	0.049998635077090264	0.9500013649229393	0.9483369285467477
463	0.5039637070549804	0.13681085259723158	2.5368776746900714	nan	0.40030036402926383	0.5996996359653118	0.4003093533283757	0.049998635077090264	0.9500013649229393	0.9483789434440882
464	0.5039637070549804	0.13677684649751798	2.5372623488111756	nan	0.40030036402926383	0.5996996359653118	0.4003093533283757	0.049998635077090264	0.9500013649229393	0.9484209260285605
465	0.5039637070549804	0.13674286655368384	2.5376470589097773	nan	0.40030036402926383	0.5996996359653118	0.4003093533283757	0.049998635077090264	0.9500013649229393	0.9484628763220194
466	0.5039637070549804	0.13670891274802688	2.5380318049584814	nan	0.40030036402926383	0.5996996359653118	0.4003093533283757	0.049998635077090264	0.9500013649229393	0.9485047943463195
467	0.5039637070549804	0.1366749850628448	2.538416586930005	nan	0.40030036402926383	0.5996996359653118	0.4003093533283757	0.049998635077090264	0.9500013649229393	0.9485466801233154
468	0.5039637070549804	0.13664108348043513	2.538801404797172	nan	0.40030036402926383	0.5996996359653118	0.4003093533283757	0.049998635077090264	0.9500013649229393	0.9485885336748618
469	0.5039637070549804	0.13660720798309567	2.539186258532922	nan	0.40030036402926383	0.5996996359653118	0.4003093533283757	0.049998635077090264	0.9500013649229393	0.9486303550228133
470	0.5039637070549804	0.1365733585531238	2.5395711481103023	nan	0.40030036402926383	0.5996996359653118	0.4003093533283757	0.049998635077090264	0.9500013649229393	0.9486721441890247
471	0.5039637070549804	0.13653953517281736	2.5399560735024727	nan	0.40030036402926383	0.5996996359653118	0.4003093533283757	0.049998635077090264	0.9500013649229393	0.9487139011953504
472	0.5039637070549804	0.13650573782447395	2.5403410346827053	nan	0.40030036402926383	0.5996996359653118	0.4003093533283757	0.049998635077090264	0.9500013649229393	0.948755626063645
473	0.5039637070549804	0.13647196649039095	2.5407260316243887	nan	0.40030036402926383	0.5996996359653118	0.4003093533283757	0.049998635077090264	0.9500013649229393	0.9487973188157636
474	0.5039637070549804	0.1364382211528664	2.541111064301016	nan	0.40030036402926383	0.5996996359653118	0.4003093533283757	0.049998635077090264	0.9500013649229393	0.9488389794735603
475	0.5039637070549804	0.1364045017941976	2.541496132686203	nan	0.40030036402926383	0.5996996359653118	0.4003093533283757	0.049998635077090264	0.9500013649229393	0.9488806080588902
476	0.5039637070549804	0.13637080839668225	2.541881236753672	nan	0.40030036402926383	0.5996996359653118	0.4003093533283757	0.049998635077090264	0.9500013649229393	0.9489222045936077
477	0.5039637070549804	0.13633714094261817	2.542266376477265	nan	0.40030036402926383	0.5996996359653118	0.4003093533283757	0.049998635077090264	0.9500013649229393	0.9489637690995674
478	0.5039637070549804	0.13630349941430275	2.542651551830936	nan	0.40030036402926383	0.5996996359653118	0.4003093533283757	0.049998635077090264	0.9500013649229393	0.9490053015986241
479	0.5039637070549804	0.1362698837940337	2.5430367627887547	nan	0.40030036402926383	0.5996996359653118	0.4003093533283757	0.049998635077090264	0.9500013649229393	0.9490468021126324
480	0.5039637070549804	0.13623629406410864	2.5434220093249067	nan	0.40030036402926383	0.5996996359653118	0.4003093533283757	0.049998635077090264	0.9500013649229393	0.9490882706634469
481	0.5039637070549804	0.13620273020682527	2.5438072914136916	nan	0.40030036402926383	0.5996996359653118	0.4003093533283757	0.049998635077090264	0.9500013649229393	0.9491297072729222
482	0.5039637070549804	0.1361691922044812	2.5441926090295306	nan	0.40030036402926383	0.5996996359653118	0.4003093533283757	0.049998635077090264	0.9500013649229393	0.9491711119629131
483	0.5039637070549804	0.13613568003937393	2.544577962146957	nan	0.40030036402926383	0.5996996359653118	0.4003093533283757	0.049998635077090264	0.9500013649229393	0.9492124847552743
484	0.5039637070549804	0.1361021936938014	2.5449633507406215	nan	0.40030036402926383	0.5996996359653118	0.4003093533283757	0.049998635077090264	0.9500013649229393	0.9492538256718601
485	0.5039637070549804	0.13606873315006074	2.545348774785298	nan	0.40030036402926383	0.5996996359653118	0.4003093533283757	0.049998635077090264	0.9500013649229393	0.9492951347345255
486	0.5039637070549804	0.13603529839045003	2.54573423425587	nan	0.40030036402926383	0.5996996359653118	0.4003093533283757	0.049998635077090264	0.9500013649229393	0.949336411965125
487	0.5039637070549804	0.13600188939726665	2.5461197291273496	nan	0.40030036402926383	0.5996996359653118	0.4003093533283757	0.049998635077090264	0.9500013649229393	0.9493776573855133
488	0.5039637070549804	0.13596850615280842	2.5465052593748583	nan	0.40030036402926383	0.5996996359653118	0.4003093533283757	0.049998635077090264	0.9500013649229393	0.9494188710175449
489	0.5039637070549804	0.13593514863937284	2.5468908249736453	nan	0.40030036402926383	0.5996996359653118	0.4003093533283757	0.049998635077090264	0.9500013649229393	0.9494600528830746
490	0.5039637070549804	0.1359018168392575	2.5472764258990743	nan	0.40030036402926383	0.5996996359653118	0.4003093533283757	0.049998635077090264	0.9500013649229393	0.9495012030039569
491	0.5039637070549804	0.13586851073476014	2.5476620621266326	nan	0.40030036402926383	0.5996996359653118	0.4003093533283757	0.049998635077090264	0.9500013649229393	0.9495423214020466
492	0.5039637070549804	0.13583523030817823	2.5480477336319263	nan	0.40030036402926383	0.5996996359653118	0.4003093533283757	0.049998635077090264	0.9500013649229393	0.9495834080991984
493	0.5039637070549804	0.13580197554180973	2.548433440390684	nan	0.40030036402926383	0.5996996359653118	0.4003093533283757	0.049998635077090264	0.9500013649229393	0.9496244631172667
494	0.5039637070549804	0.1357687464179519	2.5488191823787574	nan	0.40030036402926383	0.5996996359653118	0.4003093533283757	0.049998635077090264	0.9500013649229393	0.9496654864781063
495	0.5039637070549804	0.13573554291890255	2.5492049595721165	nan	0.40030036402926383	0.5996996359653118	0.4003093533283757	0.049998635077090264	0.9500013649229393	0.9497064782035718
496	0.5039637070549804	0.1357023650269592	2.5495907719468596	nan	0.40030036402926383	0.5996996359653118	0.4003093533283757	0.049998635077090264	0.9500013649229393	0.949747438315518
497	0.5039637070549804	0.13566921272441967	2.5499766194792013	nan	0.40030036402926383	0.5996996359653118	0.4003093533283757	0.049998635077090264	0.9500013649229393	0.9497883668357993
498	0.5039637070549804	0.13563608599358135	2.5503625021454877	nan	0.40030036402926383	0.5996996359653118	0.4003093533283757	0.049998635077090264	0.9500013649229393	0.9498292637862705
499	0.5039637070549804	0.13560298481674216	2.550748419922182	nan	0.40030036402926383	0.5996996359653118	0.4003093533283757	0.049998635077090264	0.9500013649229393	0.9498701291887862
