# Supplementary material
Source: ML conference proceedings conference paper supplement (https://openreview.net/forum?id=bsycpMi00R1)
Supplement: supplementary_material [file Simulation - Restricted Space Convergence - 2.xlsx]

## Sheet: Player Data
Player ID	Team	Strategy Space	Initial Strategy
1	1	[.05,.95]	0.1
2	1	[.05,.95]	0.9
3	1	[.05,.95]	0.2
4	2	[.05,.4]	0.1
5	2	[.6,.95]	0.9
6	2	[.6,.95]	0.8

## Sheet: Simulation Information
Simulation Name	Team ID 1	Team ID 2	Strategy Space	Simulation Time	Discretized Steps
Simulation	1	2	[0.1355, 0.8645],[0.13550000000000006, 0.496]	100	500

## Sheet: Simulation
Step	T1	T2	KL	Lyapunov	T1P1	T1P2	T1P3	T2P4	T2P5	T2P6
0	0.692	0.30799999999999994	2.4895895976923823	nan	0.1	0.9	0.2	0.1	0.9	0.8
1	0.686466571545629	0.30255774508478117	2.4895974120330235	nan	0.10224325285598411	0.8977567471440159	0.2053503810318442	0.09781197889511366	0.9021880211048864	0.8051559542472221
2	0.6808521375024167	0.2972203294241801	2.4895952896813913	nan	0.10453858652384364	0.8954614134761564	0.21089511756227317	0.09568402519664396	0.904315974803356	0.8101148905798028
3	0.6751698130782796	0.29199827507228315	2.48958645978393	nan	0.10688115504283553	0.8931188449571645	0.21663151453462284	0.09361921095024316	0.9063807890497568	0.8148767590680507
4	0.6694337621048216	0.2869003606043917	2.4895832413964305	nan	0.10926530147497074	0.8907346985250293	0.22255557449855992	0.09161967981235557	0.9083803201876444	0.8194428065906642
5	0.6636575475868031	0.28193532216940254	2.489587082075981	nan	0.11168536888226019	0.8883146311177399	0.2286633000037512	0.08968757543942545	0.9103124245605746	0.8238142800263418
6	0.6578547295786445	0.2771078746477873	2.489618399835657	nan	0.1141359654430746	0.8858640345569246	0.2349492695773492	0.08782263953222617	0.9121773604677754	0.8279944284706623
7	0.6520384835883557	0.27242393026585754	2.489682053495577	nan	0.11661114496611043	0.8833888550338869	0.24140830662340512	0.08602564471350443	0.9139743552865015	0.8319859655205586
8	0.6462209727569573	0.26790080000315986	2.48969570028557	nan	0.11910297066332198	0.8808970293366744	0.2480383136646581	0.08430443706428514	0.9156955629357232	0.8357862236520474
9	0.6404160653839828	0.26354062229109776	2.489680701261694	nan	0.12160430850092756	0.8783956914990687	0.2548316283633196	0.08265781076127494	0.9173421892387341	0.8394001041292538
10	0.6346366348397998	0.25934509247440485	2.4896527527700014	nan	0.12410802444514545	0.8758919755548513	0.261780588381601	0.08108455998118046	0.9189154400188282	0.842832508216303
11	0.6288945453517691	0.2553154747184224	2.489622653377901	nan	0.12660698446219393	0.8733930155378037	0.2688775313817138	0.07958347890070831	0.9204165210992993	0.8460883371773198
12	0.6232006435055212	0.2514526144311834	2.4895970577837883	nan	0.12909405451829134	0.8709059454817073	0.27611479502586933	0.07815336169656514	0.9218466383034413	0.8491724922764294
13	0.6175647551085983	0.24775695113888596	2.4895792112247497	nan	0.13156210057965595	0.8684378994203437	0.283484716976279	0.07679300254545757	0.923206997454548	0.8520898747777569
14	0.6119956870480028	0.24422853175582526	2.4895696592526804	nan	0.13400398861250606	0.8659960113874942	0.2909796348951544	0.07550119562409223	0.9244988043759133	0.8548453859454274
15	0.6065012337601061	0.24086702419228878	2.489566928843179	nan	0.13641258458306	0.8635874154169404	0.2985918864447068	0.07427673510917576	0.9257232648908308	0.8574439270435658
16	0.6010881879209101	0.23767173124631313	2.4895681776886454	nan	0.138780754457536	0.8612192455424639	0.30631380928714763	0.07311841517741477	0.9268815848225946	0.8598903993362971
17	0.595762354956805	0.2346416047275396	2.4895698092546246	nan	0.1411013642021524	0.858898635797846	0.3141377410846884	0.0720250300055159	0.9279749699944986	0.8621897040877465
18	0.5905285709707495	0.23177525976370295	2.4895680517891874	nan	0.1433672797831275	0.8566327202168682	0.32205601949954044	0.07099537377018578	0.9290046262298365	0.8643467425620391
19	0.5853907236761923	0.22907098924253178	2.4895595000065702	nan	0.1455713671666796	0.854428632833312	0.3300609821939152	0.07002824064813104	0.929971759351902	0.8663664160233
20	0.580343198744868	0.22653647980340885	2.4894145683458744	nan	0.14771662489839057	0.8522833751015945	0.338152934240574	0.06912527971230205	0.9308747202877418	0.8682454417464971
21	0.5753903693772068	0.22416623484589693	2.4891650262761322	nan	0.14979553221981046	0.8502044677801679	0.34632171152238717	0.06828360859630013	0.931716391403748	0.869990318246565
22	0.5705484162787731	0.22193750383006028	2.4890603381933536	nan	0.15178328744689043	0.8482167125530837	0.35454520074155776	0.06749546944132759	0.9325045305587231	0.8716217323617089
23	0.5658130767860825	0.2198495437118393	2.4890637648732623	nan	0.15367746419789993	0.8463225358020724	0.36282003179496014	0.0667599122838434	0.9332400877162085	0.8731419464422635
24	0.5611798550949945	0.2179014213959436	2.4891425517345214	nan	0.15547563609110843	0.844524363908864	0.37114283457946884	0.06607598716030653	0.9339240128397454	0.8745532228385634
25	0.5566440306508839	0.2160920211348205	2.4892679698956037	nan	0.15717537674478532	0.8428246232551885	0.37951023899195807	0.06544274410717595	0.934557255892875	0.8758578239009434
26	0.55220066578649	0.2144200519659698	2.489415353648183	nan	0.15877425977720008	0.8412257402227763	0.3879188749293023	0.0648592331609106	0.9351407668391387	0.8770580119797381
27	0.547844612571983	0.2128840551714667	2.489564132192424	nan	0.16026985880662217	0.8397301411933574	0.39636537228837604	0.06432450435796946	0.9356754956420779	0.8781560494252824
28	0.5435705188448113	0.21148241174425741	2.4896978538842705	nan	0.16165974745132103	0.8383402525486622	0.40484636096605353	0.06383760773481151	0.9361623922652337	0.8791541985879108
29	0.539372833390037	0.2102133498464831	2.4898042016613617	nan	0.1629414993295661	0.8370585006704205	0.41335847085920924	0.0633975933278957	0.9366024066721473	0.8800547218179581
30	0.5352458102451578	0.209074952245764	2.489874998740879	nan	0.16411268805962678	0.8358873119403627	0.4218983318647176	0.06300351117368098	0.9369964888263603	0.880859881465759
31	0.5311835121068275	0.20806516371603567	2.4899062041156714	nan	0.16517088725977258	0.834829112740219	0.43046257387945297	0.06265441130862634	0.9373455886914137	0.8815719398816482
32	0.5271798128204376	0.20718179839018236	2.489897897810418	nan	0.16611367054827295	0.8338863294517194	0.43904782680028975	0.06234934376919073	0.9376506562308489	0.8821931594159604
33	0.5232283989372122	0.2064225470523433	2.489854256292035	nan	0.1669386115433973	0.833061388456594	0.44765072052410226	0.06208735859183312	0.9379126414082071	0.8827258024190303
34	0.5193227703272777	0.20578498435839054	2.4897835188533	nan	0.16764328386341504	0.8323567161365732	0.45626788494776505	0.061867505813012466	0.9381324941870296	0.8831721312411926
35	0.5154562398411288	0.20526657597368647	2.489697946200912	nan	0.1682252611265957	0.8317747388733872	0.4648959499681524	0.06168883546918775	0.9383111645308577	0.8835344082327822
36	0.5116219320159893	0.20486468561781956	2.4896137728754058	nan	0.16868211695120866	0.8313178830487659	0.47353154548213877	0.06155039759681792	0.9384496024032328	0.8838148957441335
37	0.5078127808277885	0.20457658200659934	2.4895511555078134	nan	0.1690114249555234	0.8309885750444395	0.48217130138659847	0.061451242232361945	0.9385487577676961	0.8840158561255813
38	0.5040238379759638	0.20440645155105408	2.489452443154822	nan	0.16921692522314188	0.8307830747768105	0.4908062236653885	0.06139258266072162	0.9386074173393428	0.8841342365799578
39	0.5002476050396224	0.20435693686712442	2.489278443129807	nan	0.16930153543163864	0.8306984645683131	0.4994339756280097	0.06137511998697542	0.9386248800130892	0.8841679915929539
40	0.49646938049907857	0.20441178103770474	2.4892166846180768	nan	0.16925100059891685	0.8307489994010347	0.5080685193765935	0.061393806675126	0.9386061933249387	0.8841294546885117
41	0.49268145262060525	0.20457394424366604	2.4892355819406884	nan	0.16906767612462392	0.8309323238753278	0.5167065401736969	0.06144959337282738	0.9385504066272373	0.8840163972465819
42	0.48887630565243423	0.2048463131636823	2.489307306884503	nan	0.16875391740840734	0.8312460825915448	0.5253447232818775	0.06154343072773352	0.9384565692723311	0.883826590647115
43	0.48504661443590147	0.20523169447586165	2.489407839118406	nan	0.1683120798499145	0.8316879201500382	0.5339797539636927	0.06167626938749845	0.9383237306125662	0.8835578062700618
44	0.4811852399192711	0.20573280823136375	2.489517021085361	nan	0.16774451884879285	0.8322554811511604	0.5426083174816995	0.06184905999977615	0.9381509400002885	0.8832078154953728
45	0.4772852255904464	0.2063522811078926	2.4896186143776626	nan	0.16705358980468984	0.8329464101952642	0.5512270990984554	0.06206275321222061	0.9379372467878442	0.8827743897029985
46	0.47333979484033634	0.20709263955148904	2.4897003549239196	nan	0.1662416481172529	0.8337583518827016	0.5598327840765176	0.062318299672485825	0.9376817003275791	0.8822553002728896
47	0.4693423492643269	0.2079563028155873	2.4897540046521227	nan	0.16531104918612943	0.8346889508138254	0.5684220576784434	0.0626166500282258	0.9373833499718395	0.8816483185849967
48	0.46528646790511485	0.20894557590685925	2.4897753976475414	nan	0.1642641484109669	0.8357358515889881	0.5769916051667904	0.06295875492709452	0.9370412450729713	0.8809512160192705
49	0.46116590743609154	0.21006264244793893	2.489764479198617	nan	0.16310330119141273	0.8368966988085421	0.5855381118041155	0.06334556501674599	0.9366544349833205	0.8801617639556615
50	0.45697460328051565	0.21130955746770552	2.4897253365179868	nan	0.16183086292711435	0.8381691370728399	0.5940582628529762	0.0637780309448342	0.9362219690552331	0.8792777337741202
51	0.45270667165789413	0.21268824013039977	2.4896662203373143	nan	0.16044918901771923	0.8395508109822339	0.60254874357593	0.06425710335901313	0.9357428966410555	0.8782968968545974
52	0.44835641254528935	0.2142004664154623	2.489599557000342	nan	0.15896063486287476	0.8410393651370767	0.6110062392355339	0.0647837329069368	0.9352162670931332	0.8772170245770438
53	0.4439183135376943	0.21584786176060078	2.4895419511144317	nan	0.15736755586222842	0.8426324441377206	0.6194274350943453	0.06535887023625919	0.9346411297638126	0.8760358883214097
54	0.4393878424128169	0.2176314475467075	2.4895136233055206	nan	0.15567340312779512	0.8443265968721512	0.6278081686162494	0.06598302293088304	0.934016977069191	0.8747510864390652
55	0.43476830045308984	0.21955110761629582	2.489505936765082	nan	0.15389150598139148	0.8461084940185559	0.6361363765606562	0.06665417796022724	0.9333458220398475	0.8733571821910213
56	0.4300468179719201	0.22161842933955145	2.489505013186598	nan	0.15201216604202836	0.8479878339579201	0.6444173466520778	0.06738095954006228	0.9326190404600134	0.8718512365916794
57	0.4252228784261526	0.22383662470940857	2.489504598701889	nan	0.15004244852212054	0.8499575514778288	0.6526433939506874	0.06816462398875914	0.9318353760113175	0.8702283375310795
58	0.4202967687462523	0.22620865849643013	2.489500962820056	nan	0.1479894186340828	0.8520105813658674	0.6608068335166578	0.06900642762468885	0.9309935723753888	0.8684835728992619
59	0.41526960926662976	0.22873723358792186	2.4894925613114154	nan	0.14586014159032992	0.8541398584096211	0.6688999804101624	0.06990762676622246	0.9300923732338563	0.8666120305862667
60	0.4101433826662085	0.23142477623280844	2.489479662471905	nan	0.1436616826032767	0.8563383173966752	0.6769151496913743	0.07086947773173098	0.9291305222683489	0.864608798482134
61	0.40492096154507634	0.23427342122932404	2.489463935561276	nan	0.14140110688533786	0.8585988931146148	0.6848446564204665	0.07189323683958544	0.9281067631604957	0.862468964476904
62	0.39960613425237557	0.23728499709464856	2.4894480007005084	nan	0.13908547964892826	0.8609145203510253	0.6926808156576124	0.07298016040815686	0.9270198395919256	0.860187616460617
63	0.39420362857247854	0.24046101125777075	2.4894349399889286	nan	0.13672186610646264	0.8632781338934918	0.7004159424629847	0.07413150475581624	0.9258684952442676	0.857759842323313
64	0.388719132870961	0.243802635319048	2.489427770066561	nan	0.13431733147035574	0.8656826685295996	0.7080423518967568	0.07534852620093466	0.9246514737991507	0.8551807299550322
65	0.38315931429893757	0.2473106904221849	2.4894288768148085	nan	0.13187894095302238	0.868121059046934	0.7155523590191017	0.07663248106188311	0.9233675189382038	0.8524453672458149
66	0.3775318336539421	0.2509856327866473	2.489439413376102	nan	0.12941375976687736	0.8705862402330802	0.7229382788901927	0.07798462565703261	0.922015374343056	0.8495488420857011
67	0.37184535649774236	0.2548275394508823	2.489458663204025	nan	0.12692885312433544	0.8730711468756233	0.7301924265702027	0.07940621630475421	0.9205937836953362	0.8464862423647311
68	0.36610956013625645	0.2588360942791119	2.4894833704592676	nan	0.12443128623781137	0.8755687137621487	0.737307117119305	0.08089850932341892	0.9191014906766733	0.8432526559729451
69	0.360335136074099	0.26301057428693375	2.489507040778924	nan	0.12192812431971997	0.8780718756802416	0.7442746655976724	0.08246276103139774	0.9175372389686964	0.839843170800383
70	0.3545337875662158	0.2673498363434562	2.4895192163086106	nan	0.11942643258247601	0.8805735674174872	0.7510873870654785	0.08410022774706175	0.9158997722530345	0.8362528747370852
71	0.34870987301022427	0.27184098241717913	2.489626982731818	nan	0.11692903768090405	0.8830709623190606	0.7577461166733724	0.08580629767943183	0.914193702320667	0.832483933765166
72	0.34289012882289654	0.276494677475277	2.4896495432639343	nan	0.1144512270633902	0.8855487729365755	0.7642316463117674	0.08758785155929877	0.9124121484408025	0.8285223939140371
73	0.3370871314826813	0.2813032894660722	2.48960511632139	nan	0.11199913090707506	0.8880008690928914	0.7705390761054416	0.08944324542454199	0.9105567545755617	0.8243663965375109
74	0.331311717052215	0.2862563235683946	2.4895343879157954	nan	0.10957756522529138	0.8904224347746759	0.7766657478238512	0.091369445057464	0.9086305549426421	0.8200159383548223
75	0.32557526214116006	0.2913432915454296	2.4894679178796686	nan	0.10719134603137183	0.892808653968596	0.7826090032364528	0.09336341624036741	0.9066365837597411	0.8154710160852066
76	0.3198896587857952	0.2965537411496806	2.489425713235957	nan	0.10484528933864914	0.8951547106613192	0.7883661841127025	0.09542212475555474	0.9045778752445561	0.8107316264478985
77	0.31426728647971924	0.30187728462135144	2.489416873119981	nan	0.10254421116045606	0.8974557888395129	0.793934632222057	0.09754253638532852	0.9024574636147848	0.8057977661621335
78	0.3087209813039924	0.3073036262378891	2.489439302740224	nan	0.10029292751012524	0.8997070724898446	0.7993116893339723	0.09972161691199133	0.9002783830881246	0.8006694319471462
79	0.3032640021170089	0.31282258887644065	2.489479496372585	nan	0.09809625440098943	0.9019037455989816	0.804494697217905	0.10195633211784572	0.8980436678822729	0.7953466205221721
80	0.29790999377678207	0.3184241395549852	2.489512392174383	nan	0.09595900784638134	0.9040409921535911	0.8094809976433115	0.10424364778519421	0.8957563522149273	0.789829328606446
81	0.29266587743958417	0.32409322401213303	2.48957664162928	nan	0.09388220111223569	0.9061177988877385	0.814272763484302	0.10657797452648174	0.8934220254736445	0.7841222450696226
82	0.2875481311191974	0.32982084439818027	2.4896066658840708	nan	0.09187233257721035	0.9081276674227651	0.8188662030271233	0.10895602916346628	0.8910439708366642	0.7782243808135426
83	0.2825677851852967	0.3355943038713162	2.4895847369367967	nan	0.08993268911355583	0.9100673108864203	0.8232612127308763	0.1113726555630303	0.8886273444371033	0.7721386080278304
84	0.2777300493394085	0.3413977421775805	2.48954162418978	nan	0.08806346937688989	0.9119365306230868	0.8274614252913549	0.11382084191977324	0.8861791580803628	0.7658714544739218
85	0.2730398384493111	0.3472161666788811	2.489498861574436	nan	0.08626487202283017	0.9137351279771468	0.8314704734043533	0.11629357642829455	0.883706423571844	0.7594294479132527
86	0.26850176996756936	0.3530354841998223	2.4894694308349434	nan	0.0845370957069943	0.9154629042929832	0.8352919897656657	0.11878384728319379	0.8812161527169476	0.7528191161072588
87	0.2641201619045561	0.3588425268815345	2.4894584736786483	nan	0.08288033908500005	0.9171196609149783	0.838929607071086	0.12128464267907033	0.878715357321075	0.7460469868173761
88	0.2598990313465318	0.36462507230107055	2.489464023701011	nan	0.08129480081246501	0.9187051991875146	0.8423869580164083	0.12378895081052368	0.876211049189627	0.7391195878050405
89	0.2558420935091401	0.37037185813705825	2.4894777511433155	nan	0.07978067954500688	0.9202193204549746	0.8456676752974269	0.12628975987215338	0.8737102401280048	0.7320434468316875
90	0.25195276131647004	0.3760725916822827	2.4894857152533394	nan	0.07833817393824336	0.9216618260617409	0.8487753916099358	0.12878005805855883	0.8712199419416095	0.7248250916587535
91	0.24823302909672873	0.38171870384870304	2.489472076654292	nan	0.07696673884851464	0.9230332611514717	0.8517140624374597	0.1312538566720219	0.8687461433281558	0.717470879115976
92	0.2446814234622814	0.38729843091137167	2.489462881990966	nan	0.07566474664590543	0.9243352533540808	0.8544901686781089	0.13370195398757095	0.866298046012611	0.7099910413852837
93	0.24129809896478305	0.392801857388949	2.4894654846393074	nan	0.07443153513883369	0.925568464861153	0.8571089635733413	0.13611498540154843	0.8638850145986374	0.7023946028704917
94	0.2380819456337817	0.39822306318548023	2.4894747095622085	nan	0.07326545323429304	0.9267345467656941	0.8595752892606613	0.13848669004367117	0.8615133099565184	0.6946887252121954
95	0.23503147711947303	0.40355701041599873	2.4894855940702074	nan	0.07216484983927704	0.9278351501607106	0.8618939878775735	0.14081080704365614	0.8591891929565374	0.6868805700509892
96	0.2321448478392243	0.4087995266600214	2.4894938845278647	nan	0.07112807386077927	0.9288719261392088	0.8640699015615826	0.14308107553122035	0.8569189244689772	0.6789772990274684
97	0.22941987015759846	0.4139472858660099	2.4894964932199466	nan	0.07015347420579335	0.9298465257941948	0.8661078724501929	0.14529123463608062	0.8547087653641215	0.6709860737822281
98	0.22685403154342054	0.41899778723155506	2.489491914832583	nan	0.06923939978131283	0.930760600218675	0.8680127426809091	0.14743502348795395	0.8525649765122534	0.662914055955863
99	0.22444451165058055	0.42394933238157756	2.489480602427574	nan	0.06838419949433132	0.9316158005056556	0.8697893543912357	0.14950618121655732	0.850493818783656	0.654768407188968
100	0.22218819927233646	0.4288010011624863	2.4894653032319605	nan	0.06758622225184241	0.932413777748143	0.8714425497186774	0.15149844695160755	0.8485015530486127	0.6465562891221385
101	0.22008157327419053	0.43355256513124407	2.4894525652492527	nan	0.06684375245138013	0.9331562475486034	0.8729772407168324	0.15340555925163055	0.846594440748597	0.6382849903728037
102	0.2181203349198393	0.4382049934911737	2.4894524447598156	nan	0.0661546696242004	0.9338453303757832	0.874398328164297	0.15522218085948236	0.8447778191407487	0.6299615117361306
103	0.2163021437221373	0.4427615416489274	2.489453698127744	nan	0.06551768507568258	0.9344823149243012	0.8757092221423475	0.15694425141336907	0.8430557485868652	0.6215901892218912
104	0.21462397407381217	0.44722552190185794	2.489453624875118	nan	0.06493130337694863	0.9350686966230353	0.8769136111007466	0.158567618569382	0.8414323814308553	0.6131760523513469
105	0.21308131347079107	0.45151228892229034	2.4895407132703307	nan	0.06439357958067132	0.9356064204193126	0.8780161009631939	0.16008945024564117	0.839910549754599	0.6049161641701978
106	0.2116703774929446	0.4547187794642917	2.490503644440542	nan	0.06390286781565895	0.9360971321843252	0.8790205963565818	0.16150673444201388	0.838493265558229	0.5988002555480176
107	0.2102995474334176	0.4550928331361218	2.4939862030192854	nan	0.0634271007483628	0.9365728992516215	0.8799930351306109	0.16290770744870303	0.8370922925515425	0.5988002446744035
108	0.2089418177231276	0.4554681179874703	2.4974564552720153	nan	0.06295684352289677	0.9370431564770876	0.8809528027689715	0.1643191863812152	0.8356808136190331	0.5988002446744035
109	0.20759732000481534	0.4558445893957445	2.5009130529813035	nan	0.06249211568067528	0.9375078843193092	0.8818999396917218	0.16574111656963547	0.8342588834306156	0.5988002446744035
110	0.2062661051465292	0.45622217335673243	2.5043557252017354	nan	0.06203290180935317	0.9379670981906314	0.8828345288358553	0.1671733506528045	0.8328266493474494	0.5988002446744035
111	0.2049482218168872	0.4566007962793284	2.5077841505777556	nan	0.061579186496585274	0.9384208135033995	0.8837566531383652	0.16861574126956297	0.8313842587306938	0.5988002446744035
112	0.20364371649696567	0.45698038499744864	2.511197958692496	nan	0.06113095433002646	0.9388690456699584	0.8846663955362448	0.17006814105875154	0.8299318589415081	0.5988002446744035
113	0.20235263349240917	0.457360866781775	2.5145967314260833	nan	0.06068818989733156	0.9393118101026534	0.8855638389664874	0.17153040265921085	0.8284695973410517	0.5988002446744035
114	0.20107501494575186	0.45774216935132805	2.5179800043224807	nan	0.06025087778615542	0.9397491222138297	0.8864490663660862	0.17300237870978163	0.8269976212904839	0.5988002446744035
115	0.19981090084895003	0.4581242208848666	2.52134726796395	nan	0.059819002584152896	0.9401809974158323	0.8873221606720346	0.17448392184930445	0.8255160781509642	0.5988002446744035
116	0.1985603290561191	0.45850695003211794	2.524697969352351	nan	0.05939254887897883	0.9406074511210065	0.8881832048213258	0.17597488471662004	0.8240251152836516	0.5988002446744035
117	0.19732333138944602	0.4588902845590246	2.52803157279149	nan	0.05897149946615875	0.9410285005338267	0.8890322836109927	0.1774751145928619	0.8225248854074128	0.5988002446744035
118	0.19609987511165272	0.45927413162466146	2.5313484383400793	nan	0.05855580885705114	0.9414441911429344	0.8898695119389568	0.17898437550044954	0.8210156244998283	0.5988002446744035
119	0.1948900709109379	0.45965845006492245	2.534646663864984	nan	0.0581454984802643	0.9418545015197214	0.8906949358146229	0.18050263241744177	0.8194973675828392	0.5988002446744035
120	0.19369391202419461	0.4600431586694701	2.5379260718560115	nan	0.057740536738867636	0.9422594632611182	0.8915086558914246	0.18202969107766248	0.8179703089226217	0.5988002446744035
121	0.19251138925000066	0.4604281769794447	2.5411864494025735	nan	0.05734089203593054	0.9426591079640554	0.8923107728227955	0.18356535721493544	0.816434642785352	0.5988002446744035
122	0.1913424909740894	0.4608134253008302	2.5444275498444604	nan	0.056946532774522426	0.9430534672254636	0.8931013872621691	0.18510943656308443	0.8148905634372063	0.5988002446744035
123	0.19018720319492233	0.46119882471752127	2.547649094413446	nan	0.0565574273577127	0.9434425726422734	0.8938805998629793	0.18666173485593326	0.8133382651443608	0.5988002446744035
124	0.1890455095493555	0.46158429710409304	2.550850773864564	nan	0.05617354418857076	0.9438264558114154	0.8946485112786596	0.18822205782730575	0.8117779421729917	0.5988002446744035
125	0.18791739133839203	0.4619697651382715	2.5540322500959896	nan	0.05579485167016602	0.9442051483298203	0.8954052221626436	0.18979021121102568	0.8102097887892752	0.5988002446744035
126	0.18680282755301303	0.46235515231310625	2.557193157756485	nan	0.05542131820556787	0.9445786817944185	0.896150833168365	0.19136600074091686	0.8086339992593874	0.5988002446744035
127	0.18570179490008054	0.46274038294884523	2.560333105839497	nan	0.05505291219784573	0.9449470878021408	0.8968854449492574	0.19294923215080312	0.8070507678495047	0.5988002446744035
128	0.18461426782830526	0.46312538220451027	2.5634516792629656	nan	0.054689602050068994	0.9453103979499177	0.8976091581587543	0.1945397111745082	0.8054602888258031	0.5988002446744035
129	0.18354021855427183	0.46351007608917494	2.5665484404340564	nan	0.05433135616530707	0.9456686438346796	0.8983220734502896	0.1961372435458559	0.803862756454459	0.5988002446744035
130	0.1824796107281934	0.463894389125788	2.569623034663051	nan	0.053978139688275716	0.9460218603117111	0.8990242936402021	0.19774162517405297	0.8022583748262655	0.5988002446744035
131	0.1814323929959899	0.4642782425278546	2.572675281362578	nan	0.05362991203426397	0.946370087965723	0.8997159273026818	0.19935263416265328	0.8006473658376688	0.5988002446744035
132	0.1803985368913278	0.4646615677376932	2.575704570305568	nan	0.05328664564025163	0.9467133543597354	0.9003970747767563	0.20097008756157214	0.7990299124387538	0.5988002446744035
133	0.17937798481902933	0.4650442870589262	2.5787107212392755	nan	0.052948298817453394	0.9470517011825337	0.9010678449098887	0.20259375999135987	0.7974062400089698	0.5988002446744035
134	0.1783706769081882	0.46542632385817684	2.581693539777624	nan	0.052614829877083956	0.9473851701229032	0.9017283465495423	0.2042234260725666	0.7957765739277668	0.5988002446744035
135	0.17737655104461558	0.4658076025759472	2.5846528189692615	nan	0.052286197130357995	0.9477138028696293	0.9023786885431803	0.20585886042574264	0.7941411395745946	0.5988002446744035
136	0.17639554290321136	0.46618804873709463	2.587588340837704	nan	0.0519623588884902	0.9480376411114971	0.9030189797382658	0.20749983767143823	0.7925001623289029	0.5988002446744035
137	0.1754275859802562	0.4665675889609061	2.5904998778927455	nan	0.051643273462695274	0.9483567265372922	0.9036493289822621	0.20914613243020358	0.7908538675701415	0.5988002446744035
138	0.17447261162561367	0.46694615097077236	2.593387194612527	nan	0.0513288991641879	0.9486711008357996	0.9042698451226326	0.21079751932258892	0.7892024806777601	0.5988002446744035
139	0.17353054907483734	0.4673236636034591	2.5962500488955875	nan	0.05101919430418275	0.9489808056958048	0.9048806370068404	0.2124537729691445	0.7875462270312086	0.5988002446744035
140	0.17260132548117313	0.4677000568179781	2.5990881934823458	nan	0.05071411719389454	0.9492858828060932	0.9054818134823487	0.21411466799042056	0.7858853320099366	0.5988002446744035
141	0.17168486588447918	0.46807526168122904	2.6019013783962386	nan	0.05041362611129506	0.9495863738886927	0.9060734834144561	0.21577997890535805	0.7842200210950032	0.5988002446744035
142	0.17074677681842998	0.4684492254176835	2.605132223366753	nan	0.0500942483451805	0.9499057516548074	0.9066557834783142	0.21744954748027753	0.7825504525200879	0.5988002446744035
143	0.17002771297630914	0.4688218103707752	2.605667317251423	nan	0.049920180710681106	0.9500798192893068	0.9072287156810568	0.21912282958058005	0.7808771704197895	0.5988002446744035
144	0.1695817310226685	0.469192653369535	2.6027983733474453	nan	0.04992726311034963	0.9500727368896383	0.9077919492377171	0.2207982462898842	0.7792017537104894	0.5988002446744035
145	0.169133745495067	0.46956155444170744	2.600086923782836	nan	0.04992757882116218	0.9500724211788258	0.9083454119211873	0.2224749246347814	0.7775250753655963	0.5988002446744035
146	0.16869305916935495	0.4699284825303718	2.597410427340855	nan	0.04992757624372702	0.9500724237562611	0.9088892893557813	0.2241527451777902	0.7758472548225916	0.5988002446744035
147	0.16826018103325036	0.4702934328337248	2.594761166673033	nan	0.04992757235954295	0.9500724276404453	0.9094235277624377	0.2258317067301125	0.7741682932702734	0.5988002446744035
148	0.16783484042151453	0.4706563165054246	2.5921405480963235	nan	0.04992757211366672	0.9500724278863215	0.9099484701878284	0.227511417864431	0.7724885821359593	0.5988002446744035
149	0.16741681007727882	0.4710170602961834	2.5895496012039807	nan	0.04992757198801882	0.9500724280119694	0.9104643907142408	0.22919155031818564	0.7708084496822091	0.5988002446744035
150	0.16700598831325697	0.47137562354968404	2.5869881010334694	nan	0.04992757195925366	0.9500724280407346	0.9109714147993403	0.23087192085549713	0.7691280791449021	0.5988002446744035
151	0.16660227344197154	0.4717319665828517	2.5844558287956065	nan	0.049927572004025624	0.9500724279959626	0.9114696679007923	0.23255234624048626	0.7674476537599175	0.5988002446744035
152	0.166205563775762	0.47208605068606607	2.5819525723246812	nan	0.04992757209898911	0.9500724279009991	0.9119592754762623	0.23423264323727386	0.7657673567631346	0.5988002446744035
153	0.16581575762679301	0.472437838123108	2.579478126505836	nan	0.049927572220798515	0.9500724277791898	0.9124403629834155	0.2359126286099806	0.7640873713904324	0.5988002446744035
154	0.1654327533070611	0.47278729213084103	2.5770322936800287	nan	0.04992757234610823	0.95007242765388	0.9129130558799173	0.23759211912272735	0.7624078808776904	0.5988002446744035
155	0.16505644912840134	0.47313437691862714	2.574614884026971	nan	0.04992757245157266	0.9500724275484156	0.9133774796234333	0.23927093153963486	0.7607290684607876	0.5988002446744035
156	0.16468674340249623	0.47347905766747733	2.572225715926397	nan	0.0499275725138462	0.9500724274861421	0.9138337596716286	0.24094888262482386	0.7590511173756034	0.5988002446744035
157	0.1643235344408801	0.4738213005289374	2.569864616298066	nan	0.04992757250958323	0.950072427490405	0.9142820214821687	0.24262578914241517	0.7573742108580168	0.5988002446744035
158	0.16396672055494732	0.474161072623707	2.567531420920906	nan	0.04992757241543817	0.95007242758455	0.9147223905127191	0.24430146785652956	0.7556985321439073	0.5988002446744035
159	0.16361620005595812	0.4744983420399945	2.5652259747316846	nan	0.04992757220806541	0.9500724277919228	0.915154992220945	0.2459757355312878	0.7540242644691539	0.5988002446744035
160	0.1632718712550444	0.47483307783160633	2.562948132103669	nan	0.04992757186411933	0.9500724281358689	0.9155799520645118	0.24764840893081067	0.752351591069636	0.5988002446744035
161	0.1629336324632159	0.47516525001577	2.560697757105708	nan	0.049927571360254344	0.950072428639734	0.9159973955010849	0.24931930481921888	0.7506806951812328	0.5988002446744035
162	0.1626013819913663	0.4754948295706931	2.5584747237421688	nan	0.04992757067312484	0.9500724293268635	0.9164074479883298	0.2509882399606333	0.7490117600398234	0.5988002446744035
163	0.16227501815027823	0.47582178843285583	2.5562789161742474	nan	0.049927569779385214	0.9500724302206032	0.9168102349839118	0.25265503111917464	0.747344968881287	0.5988002446744035
164	0.16195443925062813	0.47614609949403874	2.55411022892309	nan	0.04992756865568986	0.9500724313442986	0.9172058819454962	0.2543194950589637	0.7456805049415031	0.5988002446744035
165	0.16163954360299237	0.47646773659808483	2.551968567055254	nan	0.049927567278693186	0.9500724327212955	0.9175945143307486	0.25598144854412125	0.7440185514563505	0.5988002446744035
166	0.1613302295178516	0.4767866745373963	2.5498538463510165	nan	0.049927565625049575	0.9500724343749392	0.9179762575973341	0.2576407083387681	0.7423592916617088	0.5988002446744035
167	0.16102639530559493	0.47710288904916615	2.5477659934560535	nan	0.04992756367141343	0.9500724363285755	0.9183512372029183	0.25929709120702493	0.7407029087934571	0.5988002446744035
168	0.1607279392765253	0.4774163568113441	2.545704946017038	nan	0.04992756139443914	0.95007243860555	0.9187195786051665	0.2609504139130126	0.7390495860874745	0.5988002446744035
169	0.16043475974086285	0.47772705543833704	2.5436706528017172	nan	0.049927558770781116	0.9500724412292083	0.919081407261744	0.2626004932208519	0.7373995067796404	0.5988002446744035
170	0.1601513568248848	0.4780372532202595	2.541601096551063	nan	0.049927557972065606	0.9500724420279238	0.919431173295678	0.2642594342354514	0.7357405657650479	0.5988002446744035
171	0.1598742043062381	0.4783451691618007	2.539543019654406	nan	0.049927557972065606	0.9500724420279238	0.9197732267609847	0.2659177991638378	0.7340822008366692	0.5988002446744035
172	0.15960136920074264	0.4786498676945632	2.537521118987512	nan	0.049927557972065606	0.9500724420279238	0.9201099518023004	0.26757048305777187	0.7324295169427425	0.5988002446744035
173	0.15933280882034906	0.4789513636420037	2.5355345429006704	nan	0.049927557972065606	0.9500724420279238	0.9204414011039566	0.26921744513195156	0.7307825548685702	0.5988002446744035
174	0.15906848047700783	0.4792496719626862	2.5335824612887397	nan	0.049927557972065606	0.9500724420279238	0.9207676273502853	0.2708586446010747	0.7291413553994542	0.5988002446744035
175	0.15880834148266965	0.47954480774843067	2.531664065185243	nan	0.049927557972065606	0.9500724420279238	0.921088683225618	0.2724940406798392	0.727505959320697	0.5988002446744035
176	0.15855234914928507	0.47983678622244913	2.5297785663689414	nan	0.049927557972065606	0.9500724420279238	0.9214046214142865	0.2741235925829428	0.7258764074176003	0.5988002446744035
177	0.15830046078880466	0.4801256227374679	2.527925196982154	nan	0.049927557972065606	0.9500724420279238	0.9217154946006225	0.27574725952508344	0.7242527404754666	0.5988002446744035
178	0.15805263371317912	0.48041133277383713	2.526103209160211	nan	0.049927557972065606	0.9500724420279238	0.9220213554689577	0.27736500072095893	0.7226349992795978	0.5988002446744035
179	0.1578088252343588	0.4806939319376273	2.524311874671419	nan	0.049927557972065606	0.9500724420279238	0.9223222567036239	0.2789767753852671	0.7210232246152964	0.5988002446744035
180	0.15756899266429447	0.48097343595871206	2.5225504845669517	nan	0.049927557972065606	0.9500724420279238	0.9226182509889527	0.2805825427327059	0.7194174572678643	0.5988002446744035
181	0.15733309331493683	0.4812498606888386	2.52081834884014	nan	0.049927557972065606	0.9500724420279238	0.9229093910092757	0.282182261977973	0.7178177380226036	0.5988002446744035
182	0.15710108449823634	0.48152322209968434	2.519114796094626	nan	0.049927557972065606	0.9500724420279238	0.9231957294489249	0.28377589233576644	0.7162241076648167	0.5988002446744035
183	0.15687292352614346	0.4817935362809003	2.517439173220885	nan	0.049927557972065606	0.9500724420279238	0.923477318992232	0.285363393020784	0.7146366069798056	0.5988002446744035
184	0.15664856771060898	0.4820608194381424	2.515790845080682	nan	0.049927557972065606	0.9500724420279238	0.9237542123235284	0.2869447232477235	0.7130552767528724	0.5988002446744035
185	0.15642797436358347	0.48232508789108824	2.514169194198997	nan	0.049927557972065606	0.9500724420279238	0.924026462127146	0.28851984223128285	0.7114801577693194	0.5988002446744035
186	0.1562111007970175	0.4825863580714416	2.5125736204630247	nan	0.049927557972065606	0.9500724420279238	0.9242941210874165	0.2900887091861599	0.7099112908144486	0.5988002446744035
187	0.15599790432286154	0.48284464652092374	2.5110035408278506	nan	0.049927557972065606	0.9500724420279238	0.9245572418886717	0.2916512833270524	0.7083487166735623	0.5988002446744035
188	0.15578834225306637	0.48309996988925086	2.509458389028442	nan	0.049927557972065606	0.9500724420279238	0.9248158772152432	0.29320752386865834	0.7067924761319626	0.5988002446744035
189	0.15558237189958235	0.48335234493209966	2.50793761529762	nan	0.049927557972065606	0.9500724420279238	0.9250700797514627	0.29475739002567547	0.7052426099749516	0.5988002446744035
190	0.15537995057436038	0.4836017885090582	2.506440686089669	nan	0.049927557972065606	0.9500724420279238	0.925319902181662	0.29630084101280163	0.7036991589878315	0.5988002446744035
191	0.15518103558935092	0.48384831758156527	2.5049670838093068	nan	0.049927557972065606	0.9500724420279238	0.9255653971901727	0.2978378360447348	0.7021621639559046	0.5988002446744035
192	0.15498558425650444	0.484091949210835	2.5035163065457064	nan	0.049927557972065606	0.9500724420279238	0.9258066174613266	0.2993683343361727	0.7006316656644728	0.5988002446744035
193	0.1547935538877716	0.48433270055576955	2.502087867811336	nan	0.049927557972065606	0.9500724420279238	0.9260436156794555	0.3008922951018132	0.6991077048988383	0.5988002446744035
194	0.1546049017951031	0.4845705888708582	2.5006812962853315	nan	0.049927557972065606	0.9500724420279238	0.9262764445288909	0.3024096775563543	0.6975903224443035	0.5988002446744035
195	0.1544195852904493	0.484805631504063	2.4992961355612078	nan	0.049927557972065606	0.9500724420279238	0.9265051566939647	0.3039204409144936	0.6960795590861703	0.5988002446744035
196	0.15423756168576108	0.4850378458946918	2.4979319438986725	nan	0.049927557972065606	0.9500724420279238	0.9267298048590085	0.30542454439092914	0.694575455609741	0.5988002446744035
197	0.1540587882929889	0.48526724957125794	2.4965882939793573	nan	0.049927557972065606	0.9500724420279238	0.926950441708354	0.3069219472003587	0.6930780528003175	0.5988002446744035
198	0.15388322242408325	0.48549386014932644	2.495264772666271	nan	0.049927557972065606	0.9500724420279238	0.9271671199263329	0.3084126085574802	0.6915873914432024	0.5988002446744035
199	0.1537108213909949	0.4857176953293476	2.4939609807668166	nan	0.049927557972065606	0.9500724420279238	0.927379892197277	0.30989648767699135	0.6901035123236975	0.5988002446744035
200	0.1535415425056743	0.4859387728944773	2.4926765327992086	nan	0.049927557972065606	0.9500724420279238	0.9275888112055181	0.3113735437735901	0.688626456227105	0.5988002446744035
201	0.15337534308007206	0.4861571107083836	2.491411056762158	nan	0.049927557972065606	0.9500724420279238	0.9277939296353876	0.31284373606197435	0.6871562639387272	0.5988002446744035
202	0.15321218042613893	0.4863727267130411	2.490164193907681	nan	0.049927557972065606	0.9500724420279238	0.9279953001712176	0.31430702375684183	0.6856929762438662	0.5988002446744035
203	0.1530520118558253	0.48658563892651163	2.4889355985169264	nan	0.049927557972065606	0.9500724420279238	0.9281929754973395	0.3157633660728905	0.6842366339278241	0.5988002446744035
204	0.1528947946810819	0.48679586544071146	2.4877249376789097	nan	0.049927557972065606	0.9500724420279238	0.9283870082980851	0.31721272222481817	0.682787277775903	0.5988002446744035
205	0.15274048621385916	0.4870034244191663	2.486531891072059	nan	0.049927557972065606	0.9500724420279238	0.9285774512577861	0.3186550514273226	0.6813449485734052	0.5988002446744035
206	0.15258904376610793	0.4872083340947523	2.485356150748485	nan	0.049927557972065606	0.9500724420279238	0.9287643570607743	0.3200903128951018	0.6799096871056328	0.5988002446744035
207	0.15244042464977858	0.48741061276742415	2.484197420920899	nan	0.049927557972065606	0.9500724420279238	0.9289477783913813	0.32151846584285354	0.6784815341578879	0.5988002446744035
208	0.1522945861768218	0.4876102788019304	2.483055417752123	nan	0.049927557972065606	0.9500724420279238	0.929127767933939	0.32293946948527563	0.6770605305154729	0.5988002446744035
209	0.15215148565918812	0.48780735062551517	2.4819298691471143	nan	0.049927557972065606	0.9500724420279238	0.9293043783727789	0.324353283037066	0.6756467169636895	0.5988002446744035
210	0.15201108040882816	0.48800184672560665	2.4808205145474806	nan	0.049927557972065606	0.9500724420279238	0.9294776623922328	0.32575986571292254	0.6742401342878402	0.5988002446744035
211	0.15187332773769258	0.48819378564749294	2.4797271047284175	nan	0.049927557972065606	0.9500724420279238	0.9296476726766324	0.3271591767275429	0.6728408232732271	0.5988002446744035
212	0.15173818495773184	0.4883831859919845	2.4786494015980596	nan	0.049927557972065606	0.9500724420279238	0.9298144619103095	0.32855117529562516	0.6714488247051524	0.5988002446744035
213	0.15160560938089662	0.48857006641306333	2.4775871779992062	nan	0.049927557972065606	0.9500724420279238	0.9299780827775956	0.32993582063186705	0.6700641793689182	0.5988002446744035
214	0.1514755583191375	0.48875444561551906	2.476540217513393	nan	0.049927557972065606	0.9500724420279238	0.9301385879628227	0.3313130719509664	0.6686869280498264	0.5988002446744035
215	0.15134798908440517	0.4889363423525719	2.475508314267323	nan	0.049927557972065606	0.9500724420279238	0.9302960301503223	0.3326828884676212	0.6673171115331796	0.5988002446744035
216	0.15122285898864996	0.48911577542348256	2.4744912727416137	nan	0.049927557972065606	0.9500724420279238	0.930450462024426	0.33404522939652914	0.6659547706042797	0.5988002446744035
217	0.15110012534382278	0.4892927636711491	2.473488907581901	nan	0.049927557972065606	0.9500724420279238	0.9306019362694659	0.33540005395238814	0.6645999460484289	0.5988002446744035
218	0.15097974546187398	0.4894673259796901	2.472501043412251	nan	0.049927557972065606	0.9500724420279238	0.9307505055697733	0.33674732134989604	0.6632526786509293	0.5988002446744035
219	0.15086167665475414	0.4896394812720153	2.4715275146509414	nan	0.049927557972065606	0.9500724420279238	0.9308962226096803	0.33808699080375076	0.6619130091970832	0.5988002446744035
220	0.15074587623441404	0.4898092485073828	2.4705681653285794	nan	0.049927557972065606	0.9500724420279238	0.9310391400735183	0.33941902152865	0.6605809784721927	0.5988002446744035
221	0.15063230151280427	0.4899766466789431	2.469622848908612	nan	0.049927557972065606	0.9500724420279238	0.9311793106456191	0.3407433727392918	0.6592566272615598	0.5988002446744035
222	0.15052090980187527	0.49014169481127	2.4686914281102066	nan	0.049927557972065606	0.9500724420279238	0.9313167870103145	0.34206000365037387	0.6579399963504868	0.5988002446744035
223	0.15041165841357762	0.49030441195787866	2.46777377473357	nan	0.049927557972065606	0.9500724420279238	0.9314516218519362	0.3433688734765941	0.6566311265242759	0.5988002446744035
224	0.150304504659862	0.4904648171987299	2.466869769487695	nan	0.049927557972065606	0.9500724420279238	0.9315838678548157	0.3446699414326504	0.6553300585682292	0.5988002446744035
225	0.1501994058526791	0.490622929637722	2.465979301820589	nan	0.049927557972065606	0.9500724420279238	0.931713577703285	0.3459631667332405	0.6540368332676488	0.5988002446744035
226	0.15009631930397926	0.4907787684001689	2.4651022697520126	nan	0.049927557972065606	0.9500724420279238	0.9318408040816757	0.34724850859306233	0.652751491407837	0.5988002446744035
227	0.14999520232571328	0.49093235263026513	2.464238579708746	nan	0.049927557972065606	0.9500724420279238	0.9319655996743195	0.3485259262268138	0.6514740737740957	0.5988002446744035
228	0.14989601222983173	0.4910837014885387	2.463388146362444	nan	0.049927557972065606	0.9500724420279238	0.932088017165548	0.34979537884919265	0.6502046211517273	0.5988002446744035
229	0.14979870632828507	0.491232834149289	2.462550892470113	nan	0.049927557972065606	0.9500724420279238	0.9322081092396931	0.3510568256748967	0.6489431743260339	0.5988002446744035
230	0.14970324193302398	0.4913797697980133	2.46172674871723	nan	0.049927557972065606	0.9500724420279238	0.9323259285810864	0.352310225918624	0.6476897740823176	0.5988002446744035
231	0.14960957635599914	0.49152452762881904	2.460915653563574	nan	0.049927557972065606	0.9500724420279238	0.9324415278740597	0.3535555387950722	0.6464444612058806	0.5988002446744035
232	0.1495176669091609	0.49166712684182334	2.4601175530917994	nan	0.049927557972065606	0.9500724420279238	0.9325549598029447	0.35479272351893926	0.6452072764820249	0.5988002446744035
233	0.14942747090446018	0.49180758664053936	2.4593324008587913	nan	0.049927557972065606	0.9500724420279238	0.932666277052073	0.356021739304923	0.6439782606960529	0.5988002446744035
234	0.1493389456538473	0.49194592622924943	2.4585601577498597	nan	0.049927557972065606	0.9500724420279238	0.9327755323057763	0.3572425453677212	0.6427574546332667	0.5988002446744035
235	0.14925204846927298	0.4920821648103651	2.4578007918358065	nan	0.049927557972065606	0.9500724420279238	0.9328827782483865	0.35845510092203187	0.6415448990789684	0.5988002446744035
236	0.14916673666268776	0.49221632158177403	2.457054278232925	nan	0.049927557972065606	0.9500724420279238	0.9329880675642351	0.35965936518255276	0.64034063481846	0.5988002446744035
237	0.14908296754604222	0.4923484157341737	2.456320598965961	nan	0.049927557972065606	0.9500724420279238	0.933091452937654	0.3608552973639817	0.639144702637044	0.5988002446744035
238	0.14900069843128705	0.492478466448392	2.4555997428340977	nan	0.049927557972065606	0.9500724420279238	0.9331929870529749	0.3620428566810166	0.6379571433200223	0.5988002446744035
239	0.1489198866303727	0.49260649289269454	2.454891705280012	nan	0.049927557972065606	0.9500724420279238	0.9332927225945294	0.3632220023483553	0.636777997652697	0.5988002446744035
240	0.14884048945524986	0.49273251422007913	2.4541964882620286	nan	0.049927557972065606	0.9500724420279238	0.9333907122466493	0.3643926935806956	0.6356073064203706	0.5988002446744035
241	0.1487624642178691	0.4928565495655569	2.4535141001294436	nan	0.049927557972065606	0.9500724420279238	0.9334870086936662	0.3655548895927354	0.6344451104083448	0.5988002446744035
242	0.1486857682301811	0.4929786180434201	2.4528445555010503	nan	0.049927557972065606	0.9500724420279238	0.9335816646199119	0.36670854959917254	0.6332914504019223	0.5988002446744035
243	0.1486103588041363	0.493098738744497	2.4521878751469215	nan	0.049927557972065606	0.9500724420279238	0.933674732709718	0.3678536328147049	0.6321463671864047	0.5988002446744035
244	0.14853619325168532	0.4932169307333939	2.4515440858734774	nan	0.049927557972065606	0.9500724420279238	0.9337662656474164	0.3689900984540303	0.6310099015470945	0.5988002446744035
245	0.1484632288847788	0.49333321304572314	2.450913220411903	nan	0.049927557972065606	0.9500724420279238	0.9338563161173387	0.37011790573184655	0.6298820942692936	0.5988002446744035
246	0.14839142301536745	0.4934476046853189	2.450295317309954	nan	0.049927557972065606	0.9500724420279238	0.9339449368038165	0.3712370138628516	0.6287629861383045	0.5988002446744035
247	0.14832105091795944	0.4935602375056251	2.4496864343609017	nan	0.049927557972065606	0.9500724420279238	0.9340317879711695	0.3723485008741516	0.6276514991270176	0.5988002446744035
248	0.1482520958717496	0.4936711338003116	2.4490863517666117	nan	0.049927557972065606	0.9500724420279238	0.9341168902557225	0.37345238883773385	0.6265476111634469	0.5988002446744035
249	0.1481844016045314	0.4937802681679652	2.4484965856594307	nan	0.049927557972065606	0.9500724420279238	0.9342004365240244	0.3745482209810253	0.6254517790201672	0.5988002446744035
250	0.14811794770771636	0.49388766409194784	2.4479169470087996	nan	0.049927557972065606	0.9500724420279238	0.934282451963753	0.375636023253475	0.6243639767477294	0.5988002446744035
251	0.14805271377271656	0.49399334481315327	2.447347253531527	nan	0.049927557972065606	0.9500724420279238	0.934362961762586	0.3767158216045319	0.6232841783966844	0.5988002446744035
252	0.14798867939094318	0.4940973333316518	2.4467873295617037	nan	0.049927557972065606	0.9500724420279238	0.9344419911082016	0.3777876419836449	0.6222123580175833	0.5988002446744035
253	0.14792582415380828	0.4941996524083289	2.4462370059232823	nan	0.049927557972065606	0.9500724420279238	0.9345195651882773	0.37885151034026304	0.6211484896609774	0.5988002446744035
254	0.14786412765272328	0.4943003245665192	2.44569611980529	nan	0.049927557972065606	0.9500724420279238	0.9345957091904911	0.3799074526238353	0.6200925473774174	0.5988002446744035
255	0.14780356947910012	0.4943993720936345	2.4451645146395977	nan	0.049927557972065606	0.9500724420279238	0.9346704483025209	0.3809554947838106	0.6190445052174545	0.5988002446744035
256	0.1477441292243502	0.4944968170427871	2.4446420399811952	nan	0.049927557972065606	0.9500724420279238	0.9347438077120445	0.3819956627696379	0.6180043372316397	0.5988002446744035
257	0.1476857864798854	0.49459268123440725	2.444128551390909	nan	0.049927557972065606	0.9500724420279238	0.9348158126067397	0.38302798253076625	0.616972017470524	0.5988002446744035
258	0.14762852083711742	0.4946869862578557	2.443623910320536	nan	0.049927557972065606	0.9500724420279238	0.9348864881742845	0.3840524800166445	0.6159475199846585	0.5988002446744035
259	0.14757231188745779	0.4947797534730305	2.4431279840003164	nan	0.049927557972065606	0.9500724420279238	0.9349558596023567	0.3850691811767217	0.6149308188245941	0.5988002446744035
260	0.14751713922231835	0.49487100401196915	2.4426406453287006	nan	0.049927557972065606	0.9500724420279238	0.9350239520786341	0.3860781119604467	0.613921888040882	0.5988002446744035
261	0.1474629824331105	0.49496075878044454	2.442161772764403	nan	0.049927557972065606	0.9500724420279238	0.9350907907907947	0.38707929831726867	0.6129207016840732	0.5988002446744035
262	0.14740982313329987	0.49504903897787644	2.441691226789132	nan	0.049927557972065606	0.9500724420279238	0.9351563984309572	0.38807277205551266	0.6119272279458424	0.5988002446744035
263	0.14735764678037366	0.4951358666102359	2.4412288281363264	nan	0.049927557972065606	0.9500724420279238	0.935220792947062	0.38905857693377194	0.6109414230675965	0.5988002446744035
264	0.1473064304107642	0.49522126104910524	2.4407745030348833	nan	0.049927557972065606	0.9500724420279238	0.9352840026800672	0.3900367295805197	0.6099632704208621	0.5988002446744035
265	0.14725615770967193	0.4953052430211954	2.440328107120589	nan	0.049927557972065606	0.9500724420279238	0.935346047765217	0.39100726456547585	0.6089927354359195	0.5988002446744035
266	0.1472068123622976	0.49538783300912625	2.439889501237129	nan	0.049927557972065606	0.9500724420279238	0.9354069483377558	0.3919702164583601	0.6080297835430489	0.5988002446744035
267	0.14715837805384158	0.49546905125350366	2.4394585513390137	nan	0.049927557972065606	0.9500724420279238	0.9354667245329281	0.39292561982889224	0.6070743801725306	0.5988002446744035
268	0.14711083846950446	0.49554891775498666	2.439035128396437	nan	0.049927557972065606	0.9500724420279238	0.9355253964859781	0.39387350924679193	0.6061264907546449	0.5988002446744035
269	0.14706417729448695	0.49562745227634497	2.438619108302089	nan	0.049927557972065606	0.9500724420279238	0.9355829843321501	0.394813919281779	0.6051860807196718	0.5988002446744035
270	0.14701837821398955	0.49570467434450793	2.43821037177982	nan	0.049927557972065606	0.9500724420279238	0.9356395082066886	0.39574688450357315	0.6042531154978918	0.5988002446744035
271	0.14697342491321286	0.49578060325260304	2.437808804295167	nan	0.049927557972065606	0.9500724420279238	0.9356949882448378	0.39667243948189423	0.603327560519585	0.5988002446744035
272	0.14692930113971092	0.4958552580706952	2.4374142953178923	nan	0.049927557972065606	0.9500724420279238	0.9357494445048871	0.39759061889406205	0.6024093811074317	0.5988002446744035
273	0.1468859919466715	0.49592865782307904	2.437026725252669	nan	0.049927557972065606	0.9500724420279238	0.9358028954337515	0.3985014597145935	0.6014985402869149	0.5988002446744035
274	0.14684348275301218	0.49600082134430756	2.4366459752729703	nan	0.049927557972065606	0.9500724420279238	0.9358553590269729	0.39940499948227887	0.6005950005192442	0.5988002446744035
275	0.14680175784954963	0.4960603697914767	2.436392083269345	nan	0.049927557972065606	0.9500724420279238	0.9359068546723621	0.4001567466818215	0.5998432533197139	0.5988002446744035
276	0.1467603277460452	0.4960600333570842	2.436767359857887	nan	0.049927557972065606	0.9500724420279238	0.9359579864843366	0.4001524835929794	0.599847516408556	0.5988002446744035
277	0.14671891440520646	0.4960600336074931	2.4371392568072796	nan	0.049927557972065606	0.9500724420279238	0.9360090976083234	0.4001524867659389	0.5998475132355965	0.5988002446744035
278	0.14667753186787347	0.49606003487071715	2.4375111865725607	nan	0.049927557972065606	0.9500724420279238	0.9360601707155319	0.4001525027723933	0.5998474972291422	0.5988002446744035
279	0.1466361801196595	0.49606003503738627	2.4378831713135263	nan	0.049927557972065606	0.9500724420279238	0.9361112058237177	0.40015250488427717	0.5998474951172583	0.5988002446744035
280	0.1465948591232682	0.49606003510084007	2.4382552006880456	nan	0.049927557972065606	0.9500724420279238	0.9361622029789106	0.4001525056883077	0.5998474943132278	0.5988002446744035
281	0.14655356885998372	0.4960600350899096	2.438627274354797	nan	0.049927557972065606	0.9500724420279238	0.9362131622042096	0.4001525055498063	0.5998474944517291	0.5988002446744035
282	0.14651230931108994	0.4960600350334259	2.438999391972515	nan	0.049927557972065606	0.9500724420279238	0.9362640835227133	0.40015250483409454	0.599847495167441	0.5988002446744035
283	0.14647108045787072	0.49606003496021994	2.439371553200001	nan	0.049927557972065606	0.9500724420279238	0.9363149669575207	0.4001525039064938	0.5998474960950416	0.5988002446744035
284	0.14642988228161002	0.49606003489912287	2.4397437576961094	nan	0.049927557972065606	0.9500724420279238	0.9363658125317305	0.4001525031323257	0.5998474968692097	0.5988002446744035
285	0.14638871476359194	0.49606003487896566	2.4401160051197612	nan	0.049927557972065606	0.9500724420279238	0.9364166202684413	0.4001525028769117	0.5998474971246238	0.5988002446744035
286	0.14634757788510044	0.4960600349285794	2.440488295129934	nan	0.049927557972065606	0.9500724420279238	0.9364673901907521	0.4001525035055732	0.5998474964959623	0.5988002446744035
287	0.1463064716274194	0.4960600350767952	2.4408606273856694	nan	0.049927557972065606	0.9500724420279238	0.9365181223217616	0.4001525053836318	0.5998474946179037	0.5988002446744035
288	0.14626539597183275	0.4960600353524439	2.441233001546073	nan	0.049927557972065606	0.9500724420279238	0.9365688166845686	0.4001525088764089	0.5998474911251266	0.5988002446744035
289	0.1462243508996246	0.49606003578435676	2.4416054172703054	nan	0.049927557972065606	0.9500724420279238	0.9366194733022718	0.400152514349226	0.5998474856523095	0.5988002446744035
290	0.14618333639207892	0.49606003640136465	2.441977874217594	nan	0.049927557972065606	0.9500724420279238	0.9366700921979699	0.40015252216740466	0.5998474778341308	0.5988002446744035
291	0.14614235243047957	0.4960600372322986	2.4423503720472315	nan	0.049927557972065606	0.9500724420279238	0.936720673394762	0.4001525326962663	0.5998474673052692	0.5988002446744035
292	0.1461013989961104	0.49606003830598955	2.442722910418569	nan	0.049927557972065606	0.9500724420279238	0.9367712169157466	0.4001525463011325	0.599847453700403	0.5988002446744035
293	0.14606047607025563	0.4960600396512685	2.4430954889910215	nan	0.049927557972065606	0.9500724420279238	0.9368217227840225	0.4001525633473247	0.599847436654211	0.5988002446744035
294	0.14601958581121144	0.4960600438292398	2.44346806088255	nan	0.049927557972065606	0.9500724420279238	0.9368721883358843	0.40015261628692483	0.5998473837146149	0.5988002446744035
295	0.14597872678188106	0.49606004882160276	2.443840660223735	nan	0.049927557972065606	0.9500724420279238	0.936922615344954	0.40015267954582157	0.5998473204557235	0.5988002446744035
296	0.14593789807550106	0.4960600535358194	2.444213306587365	nan	0.049927557972065606	0.9500724420279238	0.9369730049303328	0.4001527392803261	0.5998472607212242	0.5988002446744035
297	0.14589709967512865	0.4960600579782681	2.444585999856587	nan	0.049927557972065606	0.9500724420279238	0.9370233571129306	0.4001527955712527	0.5998472044303026	0.5988002446744035
298	0.14585633156382094	0.49606006215532705	2.4449587399145685	nan	0.049927557972065606	0.9500724420279238	0.937073671913658	0.40015284849941574	0.5998471515021444	0.5988002446744035
299	0.14581559372463548	0.4960600660733745	2.4453315266444795	nan	0.049927557972065606	0.9500724420279238	0.9371239493534249	0.40015289814562943	0.5998471018559353	0.5988002446744035
300	0.14577488614062917	0.49606006973878863	2.4457043599295165	nan	0.049927557972065606	0.9500724420279238	0.9371741894531419	0.40015294459070816	0.5998470554108609	0.5988002446744035
301	0.14573420879485932	0.49606007315794765	2.446077239652886	nan	0.049927557972065606	0.9500724420279238	0.9372243922337191	0.40015298791546616	0.5998470120861071	0.5988002446744035
302	0.1456935616703834	0.49606007633722965	2.4464501656978035	nan	0.049927557972065606	0.9500724420279238	0.9372745577160667	0.40015302820071774	0.5998469718008596	0.5988002446744035
303	0.14565294475025836	0.4960600792830127	2.4468231379475105	nan	0.049927557972065606	0.9500724420279238	0.9373246859210951	0.40015306552727725	0.5998469344743039	0.5988002446744035
304	0.14561235801754158	0.49606008200167495	2.447196156285254	nan	0.049927557972065606	0.9500724420279238	0.9373747768697144	0.4001530999759589	0.5998469000256259	0.5988002446744035
305	0.14557180145529014	0.4960600844995943	2.4475692205943025	nan	0.049927557972065606	0.9500724420279238	0.9374248305828351	0.4001531316275771	0.5998468683740111	0.5988002446744035
306	0.1455312750465616	0.4960600867831489	2.447942330757936	nan	0.049927557972065606	0.9500724420279238	0.9374748470813672	0.4001531605629461	0.5998468394386455	0.5988002446744035
307	0.14549077877441285	0.49606008885871655	2.4483154866594523	nan	0.049927557972065606	0.9500724420279238	0.9375248263862211	0.40015318686288015	0.5998468131387146	0.5988002446744035
308	0.14545031262190122	0.49606009073267543	2.4486886881821643	nan	0.049927557972065606	0.9500724420279238	0.9375747685183071	0.4001532106081936	0.5998467893934041	0.5988002446744035
309	0.14540987657208415	0.49606009241140325	2.4490619352094	nan	0.049927557972065606	0.9500724420279238	0.9376246734985353	0.40015323187970075	0.5998467681218997	0.5988002446744035
310	0.14536947060801864	0.4960600939012781	2.449435227624506	nan	0.049927557972065606	0.9500724420279238	0.9376745413478161	0.40015325075821595	0.5998467492433872	0.5988002446744035
311	0.1453290947127619	0.4960600952086778	2.4498085653108426	nan	0.049927557972065606	0.9500724420279238	0.9377243720870598	0.4001532673245534	0.5998467326770522	0.5988002446744035
312	0.14528874886937138	0.49606009633998016	2.4501819481517852	nan	0.049927557972065606	0.9500724420279238	0.9377741657371765	0.4001532816595275	0.5998467183420805	0.5988002446744035
313	0.14524843306090407	0.4960600973015632	2.4505553760307297	nan	0.049927557972065606	0.9500724420279238	0.9378239223190766	0.4001532938439525	0.5998467061576577	0.5988002446744035
314	0.14520814727041742	0.4960600980998046	2.4509288488310883	nan	0.049927557972065606	0.9500724420279238	0.9378736418536704	0.4001533039586426	0.5998466960429696	0.5988002446744035
315	0.14516789148096854	0.4960600987410823	2.451302366436284	nan	0.049927557972065606	0.9500724420279238	0.937923324361868	0.40015331208441235	0.5998466879172017	0.5988002446744035
316	0.14512766567561464	0.49606009923177413	2.451675928729765	nan	0.049927557972065606	0.9500724420279238	0.9379729698645797	0.40015331830207584	0.59984668169954	0.5988002446744035
317	0.14508746983741305	0.4960600995782578	2.452049535594993	nan	0.049927557972065606	0.9500724420279238	0.9380225783827159	0.4001533226924474	0.5998466773091701	0.5988002446744035
318	0.145047303949421	0.4960600997869113	2.4524231869154454	nan	0.049927557972065606	0.9500724420279238	0.9380721499371866	0.4001533253363414	0.5998466746652776	0.5988002446744035
319	0.1450071679946957	0.4960600998641122	2.4527968825746207	nan	0.049927557972065606	0.9500724420279238	0.9381216845489023	0.4001533263145721	0.5998466736870484	0.5988002446744035
320	0.14496706195629439	0.49606009981623844	2.4531706224560317	nan	0.049927557972065606	0.9500724420279238	0.9381711822387732	0.4001533257079538	0.5998466742936679	0.5988002446744035
321	0.14492698581727426	0.49606009964966774	2.453544406443214	nan	0.049927557972065606	0.9500724420279238	0.9382206430277095	0.4001533235973008	0.599846676404322	0.5988002446744035
322	0.14488693956069254	0.49606009937077794	2.4539182344197155	nan	0.049927557972065606	0.9500724420279238	0.9382700669366215	0.40015332006342746	0.5998466799381964	0.5988002446744035
323	0.14484692316960646	0.4960600989859467	2.454292106269106	nan	0.049927557972065606	0.9500724420279238	0.9383194539864196	0.400153315187148	0.5998466848144768	0.5988002446744035
324	0.14480693662707333	0.49606009850155197	2.4546660218749716	nan	0.049927557972065606	0.9500724420279238	0.9383688041980137	0.4001533090492767	0.5998466909523489	0.5988002446744035
325	0.14476697991615028	0.4960600979239713	2.4550399811209207	nan	0.049927557972065606	0.9500724420279238	0.9384181175923145	0.40015330173062796	0.5998466982709983	0.5988002446744035
326	0.14472705301989475	0.4960600972595826	2.455413983890577	nan	0.049927557972065606	0.9500724420279238	0.938467394190232	0.40015329331201605	0.5998467066896108	0.5988002446744035
327	0.14468715592136383	0.49606009651476357	2.4557880300675823	nan	0.049927557972065606	0.9500724420279238	0.9385166340126764	0.4001532838742552	0.5998467161273722	0.5988002446744035
328	0.14464728860361464	0.49606009569589204	2.4561621195356036	nan	0.049927557972065606	0.9500724420279238	0.9385658370805582	0.4001532734981598	0.599846726503468	0.5988002446744035
329	0.14460745104970463	0.4960600948093457	2.45653625217832	nan	0.049927557972065606	0.9500724420279238	0.9386150034147874	0.4001532622645441	0.5998467377370841	0.5988002446744035
330	0.1445676432426909	0.4960600938615024	2.4569104278794347	nan	0.049927557972065606	0.9500724420279238	0.9386641330362746	0.40015325025422244	0.599846749747406	0.5988002446744035
331	0.14452786516563065	0.49606009285873987	2.4572846465226696	nan	0.049927557972065606	0.9500724420279238	0.9387132259659298	0.400153237548009	0.5998467624536196	0.5988002446744035
332	0.14448811680158136	0.4960600918074358	2.4576589079917657	nan	0.049927557972065606	0.9500724420279238	0.9387622822246632	0.4001532242267183	0.5998467757749104	0.5988002446744035
333	0.1444483981336	0.49606009071396806	2.458033212170484	nan	0.049927557972065606	0.9500724420279238	0.9388113018333852	0.40015321037116447	0.5998467896304642	0.5988002446744035
334	0.1444087091447438	0.49606008958471437	2.4584075589426098	nan	0.049927557972065606	0.9500724420279238	0.9388602848130062	0.4001531960621618	0.5998468039394668	0.5988002446744035
335	0.1443690498180703	0.4960600884260526	2.458781948191942	nan	0.049927557972065606	0.9500724420279238	0.9389092311844361	0.4001531813805247	0.5998468186211038	0.5988002446744035
336	0.1443294201366363	0.4960600872443604	2.4591563798023053	nan	0.049927557972065606	0.9500724420279238	0.9389581409685855	0.40015316640706744	0.5998468335945608	0.5988002446744035
337	0.14428982008349944	0.4960600860460157	2.459530853657543	nan	0.049927557972065606	0.9500724420279238	0.9390070141863646	0.40015315122260425	0.5998468487790238	0.5988002446744035
338	0.14425024964171662	0.49606008483739616	2.4599053696415236	nan	0.049927557972065606	0.9500724420279238	0.9390558508586835	0.4001531359079495	0.5998468640936783	0.5988002446744035
339	0.1442107087943454	0.49606008362487963	2.4602799276381297	nan	0.049927557972065606	0.9500724420279238	0.9391046510064525	0.40015312054391744	0.5998468794577099	0.5988002446744035
340	0.14417119752444263	0.4960600824148439	2.460654527531271	nan	0.049927557972065606	0.9500724420279238	0.939153414650582	0.40015310521132247	0.5998468947903045	0.5988002446744035
341	0.1441317158150659	0.49606008121366674	2.4610291692048767	nan	0.049927557972065606	0.9500724420279238	0.9392021418119821	0.40015308999097876	0.5998469100106477	0.5988002446744035
342	0.1440922636492723	0.496060080027726	2.461403852542899	nan	0.049927557972065606	0.9500724420279238	0.9392508325115632	0.4001530749637007	0.5998469250379254	0.5988002446744035
343	0.14405284101011906	0.49606007886339953	2.461778577429312	nan	0.049927557972065606	0.9500724420279238	0.9392994867702354	0.40015306021030256	0.599846939791323	0.5988002446744035
344	0.1440134478806634	0.496060077727065	2.4621533437481107	nan	0.049927557972065606	0.9500724420279238	0.9393481046089092	0.4001530458115986	0.5998469541900263	0.5988002446744035
345	0.14397408424396252	0.4960600766251003	2.4625281513833146	nan	0.049927557972065606	0.9500724420279238	0.9393966860484947	0.40015303184840323	0.5998469681532211	0.5988002446744035
346	0.14393475008307377	0.4960600755638834	2.4629030002189642	nan	0.049927557972065606	0.9500724420279238	0.9394452311099021	0.40015301840153067	0.5998469816000931	0.5988002446744035
347	0.14389544538105437	0.49606007454979184	2.463277890139125	nan	0.049927557972065606	0.9500724420279238	0.9394937398140418	0.4001530055517952	0.5998469944498278	0.5988002446744035
348	0.1438561701209614	0.4960600735892036	2.46365282102788	nan	0.049927557972065606	0.9500724420279238	0.939542212181824	0.4001529933800112	0.5998470066216112	0.5988002446744035
349	0.14381692428585224	0.4960600726884965	2.464027792769345	nan	0.049927557972065606	0.9500724420279238	0.9395906482341589	0.4001529819669929	0.5998470180346288	0.5988002446744035
350	0.1437777078587842	0.4960600718540484	2.4644028052476523	nan	0.049927557972065606	0.9500724420279238	0.939639047991957	0.4001529713935546	0.5998470286080664	0.5988002446744035
351	0.14373852082281424	0.49606007109223704	2.4647778583469586	nan	0.049927557972065606	0.9500724420279238	0.9396874114761282	0.4001529617405107	0.5998470382611096	0.5988002446744035
352	0.14369936316099985	0.4960600704094403	2.4651529519514463	nan	0.049927557972065606	0.9500724420279238	0.9397357387075831	0.4001529530886754	0.5998470469129442	0.5988002446744035
353	0.14366023485639812	0.496060069812036	2.465528085945323	nan	0.049927557972065606	0.9500724420279238	0.9397840297072317	0.400152945518863	0.5998470544827559	0.5988002446744035
354	0.14362113589206638	0.49606006930640195	2.465903260212814	nan	0.049927557972065606	0.9500724420279238	0.9398322844959844	0.4001529391118878	0.5998470608897304	0.5988002446744035
355	0.14358206625106174	0.496060068898916	2.466278474638181	nan	0.049927557972065606	0.9500724420279238	0.9398805030947516	0.4001529339485642	0.5998470660530533	0.5988002446744035
356	0.14354302591644164	0.496060068595956	2.4666537291057002	nan	0.049927557972065606	0.9500724420279238	0.9399286855244432	0.40015293010970643	0.5998470698919104	0.5988002446744035
357	0.14350401487126307	0.4960600684038997	2.467029023499677	nan	0.049927557972065606	0.9500724420279238	0.9399768318059698	0.40015292767612876	0.5998470723254874	0.5988002446744035
358	0.14346503309858338	0.4960600683291251	2.467404357704442	nan	0.049927557972065606	0.9500724420279238	0.9400249419602414	0.40015292672864555	0.5998470732729699	0.5988002446744035
359	0.1434260805814599	0.4960600683780097	2.467779731604349	nan	0.049927557972065606	0.9500724420279238	0.9400730160081685	0.40015292734807106	0.5998470726535438	0.5988002446744035
360	0.1433871573029497	0.4960600685569316	2.468155145083781	nan	0.049927557972065606	0.9500724420279238	0.9401210539706611	0.4001529296152196	0.5998470703863946	0.5988002446744035
361	0.14334826324611016	0.4960600688722684	2.4685305980271455	nan	0.049927557972065606	0.9500724420279238	0.9401690558686298	0.4001529336109055	0.5998470663907082	0.5988002446744035
362	0.14330939839399826	0.496060069330398	2.4689060903188755	nan	0.049927557972065606	0.9500724420279238	0.9402170217229846	0.400152939415943	0.59984706058567	0.5988002446744035
363	0.14327056272967165	0.49606006993769813	2.4692816218434297	nan	0.049927557972065606	0.9500724420279238	0.9402649515546357	0.4001529471111464	0.5998470528904661	0.5988002446744035
364	0.1432317562361871	0.49606007070054664	2.469657192485296	nan	0.049927557972065606	0.9500724420279238	0.9403128453844937	0.4001529567773301	0.599847043224282	0.5988002446744035
365	0.1431929788966022	0.49606007162532123	2.470032802128988	nan	0.049927557972065606	0.9500724420279238	0.9403607032334685	0.40015296849530835	0.5998470315063033	0.5988002446744035
366	0.14315423069397404	0.4960600727183997	2.470408450659045	nan	0.049927557972065606	0.9500724420279238	0.9404085251224706	0.4001529823458954	0.5998470176557158	0.5988002446744035
367	0.14311551161135994	0.49606007398615964	2.4707841379600337	nan	0.049927557972065606	0.9500724420279238	0.9404563110724101	0.4001529984099056	0.5998470015917052	0.5988002446744035
368	0.143076821631817	0.496060075434979	2.471159863916551	nan	0.049927557972065606	0.9500724420279238	0.9405040611041974	0.40015301676815324	0.5998469832334573	0.5988002446744035
369	0.1430381607384026	0.49606007707123523	2.4715356284132186	nan	0.049927557972065606	0.9500724420279238	0.9405517752387427	0.40015303750145265	0.5998469625001577	0.5988002446744035
370	0.14299952891417378	0.4960600789013062	2.4719114313346875	nan	0.049927557972065606	0.9500724420279238	0.9405994534969563	0.40015306069061807	0.5998469393109921	0.5988002446744035
371	0.14296092614218792	0.49606008093156956	2.472287272565639	nan	0.049927557972065606	0.9500724420279238	0.9406470958997484	0.4001530864164638	0.5998469135851463	0.5988002446744035
372	0.14292235240550222	0.4960600831684029	2.472663151990778	nan	0.049927557972065606	0.9500724420279238	0.9406947024680292	0.40015311475980425	0.5998468852418058	0.5988002446744035
373	0.142883807687174	0.4960600856181838	2.473039069494842	nan	0.049927557972065606	0.9500724420279238	0.9407422732227091	0.40015314580145356	0.5998468542001565	0.5988002446744035
374	0.1428452919702603	0.4960600882872899	2.4734150249625984	nan	0.049927557972065606	0.9500724420279238	0.9407898081846984	0.4001531796222262	0.599846820379384	0.5988002446744035
375	0.14280680523781852	0.4960600911820988	2.4737910182788356	nan	0.049927557972065606	0.9500724420279238	0.9408373073749071	0.4001532163029363	0.5998467836986741	0.5988002446744035
376	0.1427683474729058	0.49606009430898806	2.4741670493283845	nan	0.049927557972065606	0.9500724420279238	0.9408847708142458	0.4001532559243983	0.5998467440772124	0.5988002446744035
377	0.14272991865857942	0.4960600976743351	2.4745431179960953	nan	0.049927557972065606	0.9500724420279238	0.9409321985236245	0.40015329856742643	0.5998467014341846	0.5988002446744035
378	0.14269151877789676	0.4960601012845175	2.474919224166851	nan	0.049927557972065606	0.9500724420279238	0.9409795905239535	0.400153344312835	0.5998466556887765	0.5988002446744035
379	0.1426531478139147	0.4960601051459126	2.4752953677255682	nan	0.049927557972065606	0.9500724420279238	0.9410269468361433	0.40015339324143834	0.5998466067601737	0.5988002446744035
380	0.14261480574969077	0.4960601092648978	2.4756715485571874	nan	0.049927557972065606	0.9500724420279238	0.9410742674811038	0.40015344543405074	0.599846554567562	0.5988002446744035
381	0.1425764925682821	0.4960601136478506	2.476047766546687	nan	0.049927557972065606	0.9500724420279238	0.9411215524797456	0.40015350097148644	0.599846499030127	0.5988002446744035
382	0.142538208252746	0.49606011830114816	2.4764240215790707	nan	0.049927557972065606	0.9500724420279238	0.9411688018529787	0.4001535599345598	0.5998464400670545	0.5988002446744035
383	0.14249995278613958	0.49606012323116794	2.476800313539373	nan	0.049927557972065606	0.9500724420279238	0.9412160156217134	0.40015362240408514	0.59984637759753	0.5988002446744035
384	0.14246172615152009	0.49606012844428704	2.477176642312668	nan	0.049927557972065606	0.9500724420279238	0.9412631938068602	0.4001536884608767	0.5998463115407395	0.5988002446744035
385	0.14242352833194494	0.49606013394688275	2.477553007784051	nan	0.049927557972065606	0.9500724420279238	0.941310336429329	0.40015375818574883	0.5998462418158687	0.5988002446744035
386	0.14238535931047114	0.49606013974533214	2.477929409838657	nan	0.049927557972065606	0.9500724420279238	0.9413574435100304	0.4001538316595158	0.5998461683421029	0.5988002446744035
387	0.14234721907015602	0.4960601458460124	2.4783058483616474	nan	0.049927557972065606	0.9500724420279238	0.9414045150698744	0.4001539089629919	0.5998460910386282	0.5988002446744035
388	0.1423091075940568	0.4960601522553005	2.478682323238222	nan	0.049927557972065606	0.9500724420279238	0.9414515511297715	0.4001539901769915	0.5998460098246302	0.5988002446744035
389	0.1422710248652308	0.49606015897957334	2.479058834353606	nan	0.049927557972065606	0.9500724420279238	0.9414985517106318	0.40015407538232883	0.5998459246192945	0.5988002446744035
390	0.14223297086673514	0.496060166025208	2.479435381593066	nan	0.049927557972065606	0.9500724420279238	0.9415455168333655	0.40015416465981823	0.5998458353418069	0.5988002446744035
391	0.14219494558162715	0.4960601733985813	2.4798119648418933	nan	0.049927557972065606	0.9500724420279238	0.9415924465188831	0.400154258090274	0.5998457419113532	0.5988002446744035
392	0.14215694899296405	0.49606018110607003	2.48018858398542	nan	0.049927557972065606	0.9500724420279238	0.9416393407880945	0.4001543557545104	0.5998456442471188	0.5988002446744035
393	0.14211898108380294	0.4960601891540509	2.4805652389090076	nan	0.049927557972065606	0.9500724420279238	0.9416861996619104	0.40015445773334174	0.5998455422682897	0.5988002446744035
394	0.14208104183720116	0.49606019754890057	2.4809419294980524	nan	0.049927557972065606	0.9500724420279238	0.9417330231612407	0.4001545641075824	0.5998454358940515	0.5988002446744035
395	0.14204313123621592	0.49606020629699565	2.4813186556379856	nan	0.049927557972065606	0.9500724420279238	0.9417798113069958	0.4001546749580466	0.5998453250435899	0.5988002446744035
396	0.14200524926390445	0.4960602154047127	2.481695417214274	nan	0.049927557972065606	0.9500724420279238	0.9418265641200861	0.4001547903655486	0.5998452096360906	0.5988002446744035
397	0.14196739590332408	0.496060224878428	2.4820722141124163	nan	0.049927557972065606	0.9500724420279238	0.9418732816214217	0.4001549104109028	0.5998450895907391	0.5988002446744035
398	0.14192957113753202	0.49606023472451805	2.4824490462179494	nan	0.049927557972065606	0.9500724420279238	0.9419199638319128	0.40015503517492346	0.5998449648267216	0.5988002446744035
399	0.14189177494958538	0.4960602449493591	2.482825913416443	nan	0.049927557972065606	0.9500724420279238	0.9419666107724698	0.4001551647384249	0.5998448352632233	0.5988002446744035
400	0.1418540073225415	0.49606025555932726	2.483202815593504	nan	0.049927557972065606	0.9500724420279238	0.9420132224640029	0.40015529918222137	0.5998447008194302	0.5988002446744035
401	0.14181626823945748	0.4960602665607987	2.4835797526347747	nan	0.049927557972065606	0.9500724420279238	0.9420597989274224	0.4001554385871272	0.5998445614145279	0.5988002446744035
402	0.14177855768339076	0.4960602779601494	2.4839567244259344	nan	0.049927557972065606	0.9500724420279238	0.9421063401836385	0.4001555830339567	0.5998444169677021	0.5988002446744035
403	0.14174087563739834	0.49606028976375527	2.484333730852697	nan	0.049927557972065606	0.9500724420279238	0.9421528462535615	0.40015573260352416	0.5998442673981385	0.5988002446744035
404	0.14170322208453767	0.4960603019779921	2.484710771800814	nan	0.049927557972065606	0.9500724420279238	0.9421993171581017	0.4001558873766439	0.5998441126250228	0.5988002446744035
405	0.14166559700786596	0.49606031460923555	2.485087847156075	nan	0.049927557972065606	0.9500724420279238	0.9422457529181693	0.4001560474341302	0.5998439525675408	0.5988002446744035
406	0.14162800039044032	0.4960603276638613	2.4854649568043055	nan	0.049927557972065606	0.9500724420279238	0.9422921535546745	0.40015621285679737	0.5998437871448781	0.5988002446744035
407	0.14159043221531808	0.49606034114824477	2.48584210063137	nan	0.049927557972065606	0.9500724420279238	0.9423385190885277	0.4001563837254597	0.5998436162762204	0.5988002446744035
408	0.14155289246555647	0.4960603550687614	2.4862192785231683	nan	0.049927557972065606	0.9500724420279238	0.9423848495406392	0.4001565601209315	0.5998434398807535	0.5988002446744035
409	0.1415153811242127	0.49606036943178633	2.486596490365642	nan	0.049927557972065606	0.9500724420279238	0.942431144931919	0.4001567421240271	0.599843257877663	0.5988002446744035
410	0.14147789817434397	0.4960603842436948	2.486973736044769	nan	0.049927557972065606	0.9500724420279238	0.9424774052832776	0.4001569298155607	0.5998430701861346	0.5988002446744035
411	0.14144044359900743	0.4960603995108618	2.4873510154465643	nan	0.049927557972065606	0.9500724420279238	0.9425236306156253	0.4001571232763467	0.5998428767253541	0.5988002446744035
412	0.1414030173812606	0.49606041523966216	2.4877283284570852	nan	0.049927557972065606	0.9500724420279238	0.9425698209498721	0.4001573225871994	0.599842677414507	0.5988002446744035
413	0.1413656195041605	0.4960604314364706	2.4881056749624264	nan	0.049927557972065606	0.9500724420279238	0.9426159763069285	0.40015752782893305	0.5998424721727793	0.5988002446744035
414	0.14132824995076432	0.4960604481076619	2.4884830548487207	nan	0.049927557972065606	0.9500724420279238	0.9426620967077046	0.40015773908236196	0.5998422609193566	0.5988002446744035
415	0.14129090870412953	0.4960604652596104	2.488860468002146	nan	0.049927557972065606	0.9500724420279238	0.9427081821731108	0.40015795642830043	0.5998420435734244	0.5988002446744035
416	0.1412535957473131	0.4960604828986905	2.489237914308915	nan	0.049927557972065606	0.9500724420279238	0.9427542327240572	0.4001581799475628	0.5998418200541686	0.5988002446744035
417	0.1412163110633725	0.4960605010312763	2.489615393655284	nan	0.049927557972065606	0.9500724420279238	0.9428002483814543	0.40015840972096334	0.5998415902807749	0.5988002446744035
418	0.14117905463536484	0.49606051966374193	2.4899929059275463	nan	0.049927557972065606	0.9500724420279238	0.9428462291662121	0.4001586458293164	0.599841354172429	0.5988002446744035
419	0.1411418264463472	0.49606053880246126	2.4903704510120424	nan	0.049927557972065606	0.9500724420279238	0.9428921750992411	0.40015888835343616	0.5998411116483164	0.5988002446744035
420	0.14110462647937705	0.4960605584538079	2.4907480287951484	nan	0.049927557972065606	0.9500724420279238	0.9429380862014514	0.400159137374137	0.5998408626276232	0.5988002446744035
421	0.1410674547175116	0.4960605786241556	2.491125639163285	nan	0.049927557972065606	0.9500724420279238	0.9429839624937533	0.40015939297223324	0.5998406070295347	0.5988002446744035
422	0.14103031114380804	0.4960605993198776	2.4915032820029133	nan	0.049927557972065606	0.9500724420279238	0.9430298039970569	0.4001596552285392	0.5998403447732368	0.5988002446744035
423	0.14099319574132363	0.49606062054734723	2.4918809572005376	nan	0.049927557972065606	0.9500724420279238	0.9430756107322729	0.4001599242238691	0.5998400757779152	0.5988002446744035
424	0.14095610849311546	0.49606064231293745	2.4922586646427067	nan	0.049927557972065606	0.9500724420279238	0.9431213827203111	0.40016020003903724	0.5998397999627556	0.5988002446744035
425	0.14091904938224098	0.4960606646230212	2.4926364042160083	nan	0.049927557972065606	0.9500724420279238	0.943167119982082	0.400160482754858	0.5998395172469436	0.5988002446744035
426	0.1408820183917573	0.49606068748397103	2.493014175807077	nan	0.049927557972065606	0.9500724420279238	0.9432128225384959	0.4001607724521456	0.5998392275496651	0.5988002446744035
427	0.14084501550472162	0.4960607109021596	2.4933919793025865	nan	0.049927557972065606	0.9500724420279238	0.943258490410463	0.40016106921171446	0.5998389307901056	0.5988002446744035
428	0.14080804070419128	0.4960607348839591	2.4937698145892577	nan	0.049927557972065606	0.9500724420279238	0.9433041236188934	0.4001613731143787	0.5998386268874509	0.5988002446744035
429	0.14077109397322352	0.4960607594357417	2.494147681553855	nan	0.049927557972065606	0.9500724420279238	0.9433497221846975	0.4001616842409528	0.5998383157608868	0.5988002446744035
430	0.14073417529487542	0.49606078456387925	2.494525580083188	nan	0.049927557972065606	0.9500724420279238	0.9433952861287856	0.40016200267225094	0.5998379973295987	0.5988002446744035
431	0.14069728465220432	0.49606081027474347	2.494903510064108	nan	0.049927557972065606	0.9500724420279238	0.9434408154720679	0.4001623284890875	0.5998376715127727	0.5988002446744035
432	0.14066042202826745	0.49606083657470584	2.4952814713835165	nan	0.049927557972065606	0.9500724420279238	0.9434863102354548	0.4001626617722767	0.5998373382295943	0.5988002446744035
433	0.14062358740612213	0.49606086347013767	2.4956594639283534	nan	0.049927557972065606	0.9500724420279238	0.9435317704398564	0.40016300260263293	0.5998369973992491	0.5988002446744035
434	0.14058678076882547	0.4960608909674099	2.4960374875856104	nan	0.049927557972065606	0.9500724420279238	0.943577196106183	0.40016335106097045	0.5998366489409229	0.5988002446744035
435	0.1405500020994347	0.4960609190728934	2.496415542242323	nan	0.049927557972065606	0.9500724420279238	0.9436225872553448	0.4001637072281035	0.5998362927738015	0.5988002446744035
436	0.14051325138100712	0.4960609477929588	2.4967936277855713	nan	0.049927557972065606	0.9500724420279238	0.9436679439082521	0.4001640711848465	0.5998359288170705	0.5988002446744035
437	0.14047652859659998	0.49606097713397634	2.4971717441024843	nan	0.049927557972065606	0.9500724420279238	0.9437132660858153	0.40016444301201365	0.5998355569899155	0.5988002446744035
438	0.1404398337292705	0.49606100710231626	2.497549891080239	nan	0.049927557972065606	0.9500724420279238	0.9437585538089445	0.40016482279041926	0.5998351772115225	0.5988002446744035
439	0.14040316676207576	0.4960610377043484	2.497928068606054	nan	0.049927557972065606	0.9500724420279238	0.94380380709855	0.40016521060087773	0.5998347894010768	0.5988002446744035
440	0.14036652767807334	0.4960610689464423	2.4983062765672033	nan	0.049927557972065606	0.9500724420279238	0.9438490259755421	0.40016560652420324	0.5998343934777646	0.5988002446744035
441	0.14032991646032	0.49606110083496735	2.4986845148510035	nan	0.049927557972065606	0.9500724420279238	0.9438942104608311	0.40016601064121016	0.5998339893607711	0.5988002446744035
442	0.14029333309187342	0.4960611333762927	2.4990627833448196	nan	0.049927557972065606	0.9500724420279238	0.9439393605753271	0.4001664230327127	0.5998335769692823	0.5988002446744035
443	0.14025677755579058	0.4960611665767871	2.4994410819360686	nan	0.049927557972065606	0.9500724420279238	0.9439844763399405	0.4001668437795253	0.5998331562224839	0.5988002446744035
444	0.1402202498351287	0.49606120044281915	2.499819410512213	nan	0.049927557972065606	0.9500724420279238	0.9440295577755816	0.40016727296246224	0.5998327270395615	0.5988002446744035
445	0.14018374991294524	0.4960612349807571	2.5001977689607653	nan	0.049927557972065606	0.9500724420279238	0.9440746049031605	0.4001677106623377	0.5998322893397009	0.5988002446744035
446	0.1401472777722973	0.49606127019696905	2.500576157169289	nan	0.049927557972065606	0.9500724420279238	0.9441196177435875	0.40016815695996605	0.5998318430420876	0.5988002446744035
447	0.14011083339624197	0.49606130609782256	2.500954575025398	nan	0.049927557972065606	0.9500724420279238	0.944164596317773	0.40016861193616166	0.5998313880659075	0.5988002446744035
448	0.14007441676783683	0.4960613426896851	2.501333022416752	nan	0.049927557972065606	0.9500724420279238	0.9442095406466271	0.4001690756717387	0.5998309243303463	0.5988002446744035
449	0.14003802787013875	0.49606137997892386	2.5017114992310656	nan	0.049927557972065606	0.9500724420279238	0.9442544507510602	0.40016954824751155	0.5998304517545897	0.5988002446744035
450	0.14000166668620506	0.49606141797190556	2.502090005356104	nan	0.049927557972065606	0.9500724420279238	0.9442993266519825	0.4001700297442945	0.5998299702578233	0.5988002446744035
451	0.1399653331990932	0.49606145667499674	2.5024685406796827	nan	0.049927557972065606	0.9500724420279238	0.9443441683703042	0.40017052024290184	0.5998294797592328	0.5988002446744035
452	0.1399290273918602	0.49606149609456357	2.502847105089667	nan	0.049927557972065606	0.9500724420279238	0.9443889759269356	0.4001710198241479	0.5998289801780041	0.5988002446744035
453	0.13989275564142978	0.49606149746273026	2.5032260403899524	nan	0.049927557972065606	0.9500724420279238	0.9444337414516656	0.400171037163562	0.5998289628385908	0.5988002446744035
454	0.13985651159257761	0.49606149747740674	2.5036050258111393	nan	0.049927557972065606	0.9500724420279238	0.9444784727879246	0.40017103734956416	0.5998289626525888	0.5988002446744035
455	0.13982029499931203	0.49606149749488904	2.503984049407223	nan	0.049927557972065606	0.9500724420279238	0.9445231702393084	0.40017103757112515	0.5998289624310279	0.5988002446744035
456	0.1397841058437852	0.49606149751805173	2.5043631111170814	nan	0.049927557972065606	0.9500724420279238	0.9445678338278441	0.40017103786467684	0.5998289621374764	0.5988002446744035
457	0.13974794410814928	0.49606149754976947	2.504742210879683	nan	0.049927557972065606	0.9500724420279238	0.9446124635755592	0.4001710382666509	0.5998289617355024	0.5988002446744035
458	0.13971180977455655	0.49606149759291696	2.505121348634079	nan	0.049927557972065606	0.9500724420279238	0.9446570595044805	0.40017103881347915	0.5998289611886742	0.5988002446744035
459	0.1396757028251593	0.4960614976503688	2.5055005243194177	nan	0.049927557972065606	0.9500724420279238	0.9447016216366354	0.4001710395415932	0.5998289604605602	0.5988002446744035
460	0.13963962324210977	0.49606149772499963	2.5058797378749365	nan	0.049927557972065606	0.9500724420279238	0.9447461499940509	0.400171040487425	0.5998289595147285	0.5988002446744035
461	0.13960357100756005	0.49606149781968417	2.5062589892399645	nan	0.049927557972065606	0.9500724420279238	0.9447906445987544	0.4001710416874062	0.5998289583147474	0.5988002446744035
462	0.13956754610366273	0.49606149793729704	2.5066382783539165	nan	0.049927557972065606	0.9500724420279238	0.9448351054727727	0.4001710431779686	0.599828956824185	0.5988002446744035
463	0.13953154851256988	0.4960614980807128	2.5070176051563093	nan	0.049927557972065606	0.9500724420279238	0.9448795326381333	0.40017104499554385	0.5998289550066098	0.5988002446744035
464	0.13949557821643377	0.49606149825280615	2.507396969586745	nan	0.049927557972065606	0.9500724420279238	0.9449239261168632	0.4001710471765638	0.5998289528255899	0.5988002446744035
465	0.13945963519740656	0.49606149845645175	2.5077763715849173	nan	0.049927557972065606	0.9500724420279238	0.9449682859309896	0.40017104975746026	0.5998289502446936	0.5988002446744035
466	0.13942371943764076	0.4960614986945243	2.50815581109062	nan	0.049927557972065606	0.9500724420279238	0.9450126121025395	0.40017105277466486	0.5998289472274891	0.5988002446744035
467	0.1393878309192883	0.4960614989698984	2.508535288043732	nan	0.049927557972065606	0.9500724420279238	0.9450569046535404	0.40017105626460947	0.5998289437375447	0.5988002446744035
468	0.1393519696245017	0.49606149928544857	2.5089148023842327	nan	0.049927557972065606	0.9500724420279238	0.9451011636060191	0.40017106026372573	0.5998289397384285	0.5988002446744035
469	0.13931613553543287	0.4960614996440496	2.509294354052191	nan	0.049927557972065606	0.9500724420279238	0.9451453889820032	0.4001710648084455	0.5998289351937091	0.5988002446744035
470	0.13928032863423445	0.49606150004857613	2.5096739429877717	nan	0.049927557972065606	0.9500724420279238	0.9451895808035194	0.40017106993520046	0.5998289300669544	0.5988002446744035
471	0.1392445489030586	0.49606150050190273	2.5100535691312347	nan	0.049927557972065606	0.9500724420279238	0.9452337390925951	0.4001710756804224	0.5998289243217326	0.5988002446744035
472	0.13920879632405747	0.4960615010069041	2.510433232422937	nan	0.049927557972065606	0.9500724420279238	0.9452778638712575	0.4001710820805431	0.5998289179216123	0.5988002446744035
473	0.13917307087938335	0.4960615015664548	2.5108129328033275	nan	0.049927557972065606	0.9500724420279238	0.9453219551615336	0.40017108917199423	0.5998289108301615	0.5988002446744035
474	0.1391373725511884	0.49606150218342954	2.511192670212952	nan	0.049927557972065606	0.9500724420279238	0.9453660129854508	0.4001710969912077	0.5998289030109486	0.5988002446744035
475	0.13910170132162492	0.49606150286070294	2.5115724445924563	nan	0.049927557972065606	0.9500724420279238	0.945410037365036	0.4001711055746151	0.5998288944275416	0.5988002446744035
476	0.13906605717284537	0.49606150360114953	2.511952255882578	nan	0.049927557972065606	0.9500724420279238	0.9454540283223165	0.4001711149586483	0.5998288850435091	0.5988002446744035
477	0.13903044008700183	0.49606150440764407	2.5123321040241535	nan	0.049927557972065606	0.9500724420279238	0.9454979858793194	0.400171125179739	0.599828874822419	0.5988002446744035
478	0.13899485004624657	0.49606150528306114	2.5127119889581184	nan	0.049927557972065606	0.9500724420279238	0.945541910058072	0.400171136274319	0.5998288637278397	0.5988002446744035
479	0.13895928703273164	0.4960615062302754	2.513091910625504	nan	0.049927557972065606	0.9500724420279238	0.9455858008806014	0.40017114827882	0.5998288517233396	0.5988002446744035
480	0.13892375102860977	0.49606150725216136	2.5134718689674402	nan	0.049927557972065606	0.9500724420279238	0.9456296583689346	0.4001711612296738	0.5998288387724866	0.5988002446744035
481	0.13888824201603278	0.49606150835159374	2.513851863925158	nan	0.049927557972065606	0.9500724420279238	0.945673482545099	0.40017117516331213	0.5998288248388493	0.5988002446744035
482	0.13885275997715307	0.49606150953144706	2.514231895439983	nan	0.049927557972065606	0.9500724420279238	0.9457172734311217	0.40017119011616675	0.5998288098859957	0.5988002446744035
483	0.13881730489412292	0.49606151079459604	2.5146119634533433	nan	0.049927557972065606	0.9500724420279238	0.9457610310490296	0.40017120612466944	0.5998287938774942	0.5988002446744035
484	0.1387818767490946	0.49606151214391514	2.5149920679067668	nan	0.049927557972065606	0.9500724420279238	0.9458047554208503	0.40017122322525195	0.599828776776913	0.5988002446744035
485	0.13874647552422037	0.4960615135822791	2.5153722087418817	nan	0.049927557972065606	0.9500724420279238	0.9458484465686107	0.40017124145434596	0.5998287585478204	0.5988002446744035
486	0.1387111012016523	0.4960615151125624	2.515752385900414	nan	0.049927557972065606	0.9500724420279238	0.945892104514338	0.4001712608483834	0.5998287391537844	0.5988002446744035
487	0.1386757537635428	0.49606151673763976	2.5161325993241936	nan	0.049927557972065606	0.9500724420279238	0.9459357292800594	0.4001712814437958	0.5998287185583736	0.5988002446744035
488	0.13864043319204422	0.4960615184603856	2.5165128489551503	nan	0.049927557972065606	0.9500724420279238	0.945979320887802	0.4001713032770151	0.599828696725156	0.5988002446744035
489	0.13860513946930864	0.4960615202836746	2.516893134735316	nan	0.049927557972065606	0.9500724420279238	0.9460228793595931	0.400171326384473	0.5998286736177	0.5988002446744035
490	0.13856987257748832	0.49606152221038124	2.5172734566068247	nan	0.049927557972065606	0.9500724420279238	0.9460664047174596	0.40017135080260124	0.5998286491995738	0.5988002446744035
491	0.13853463249873554	0.49606152424338024	2.517653814511914	nan	0.049927557972065606	0.9500724420279238	0.946109896983429	0.4001713765678316	0.5998286234343455	0.5988002446744035
492	0.1384994192152027	0.496061526385546	2.5180342083929217	nan	0.049927557972065606	0.9500724420279238	0.9461533561795281	0.4001714037165958	0.5998285962855836	0.5988002446744035
493	0.13846423270904196	0.49606152863975317	2.518414638192291	nan	0.049927557972065606	0.9500724420279238	0.9461967823277844	0.40017143228532565	0.5998285677168562	0.5988002446744035
494	0.13842907296240536	0.49606153100887623	2.518795103852571	nan	0.049927557972065606	0.9500724420279238	0.9462401754502249	0.4001714623104528	0.5998285376917316	0.5988002446744035
495	0.13839393995744553	0.49606153349578974	2.5191756053164074	nan	0.049927557972065606	0.9500724420279238	0.9462835355688767	0.40017149382840916	0.5998285061737779	0.5988002446744035
496	0.1383588336763144	0.4960615361033682	2.519556142526561	nan	0.049927557972065606	0.9500724420279238	0.946326862705767	0.40017152687562635	0.5998284731265636	0.5988002446744035
497	0.13832375410116438	0.4960615388344861	2.519936715425888	nan	0.049927557972065606	0.9500724420279238	0.9463701568829231	0.4001715614885362	0.5998284385136569	0.5988002446744035
498	0.1382887012141477	0.496061541692018	2.5203173239573555	nan	0.049927557972065606	0.9500724420279238	0.9464134181223721	0.40017159770357047	0.5998284022986258	0.5988002446744035
499	0.1382536749974166	0.4960615446788384	2.5206979680640327	nan	0.049927557972065606	0.9500724420279238	0.9464566464461411	0.40017163555716084	0.5998283644450387	0.5988002446744035
