# Supplementary material
Source: ML conference proceedings conference paper supplement (https://openreview.net/forum?id=bsycpMi00R1)
Supplement: supplementary_material [file Simulation - Unrestricted Space Cycle (Large).xlsx]

## Sheet: Player Data
Player ID	Team	Strategy Space	Initial Strategy
1	1	[0,1]	0.1
2	1	[0,1]	0.9
3	1	[0,1]	0.2
4	2	[0,1]	0.1
5	2	[0,1]	0.9
6	2	[0,1]	0.8

## Sheet: Simulation Information
Simulation Name	Team ID 1	Team ID 2	Strategy Space	Simulation Time	Discretized Steps
Simulation	1	2	[0.0, 1.0],[0.0, 1.0]	100	500

## Sheet: Simulation
Step	T1	T2	KL	Lyapunov	T1P1	T1P2	T1P3	T2P4	T2P5	T2P6
0	0.692	0.30799999999999994	2.4895895976923823	-13.29694536210411	0.1	0.9	0.2	0.1	0.9	0.8
1	0.686466571545629	0.30255774508478117	2.4895974120330235	-13.296960990785394	0.10224325285598411	0.8977567471440159	0.2053503810318442	0.09781197889511366	0.9021880211048864	0.8051559542472221
2	0.6808521375024167	0.2972203294241801	2.4895952896813913	-13.296956746082127	0.10453858652384364	0.8954614134761564	0.21089511756227317	0.09568402519664396	0.904315974803356	0.8101148905798028
3	0.6751698130782796	0.29199827507228315	2.48958645978393	-13.296939086287203	0.10688115504283553	0.8931188449571645	0.21663151453462284	0.09361921095024316	0.9063807890497568	0.8148767590680507
4	0.6694337621048216	0.2869003606043917	2.4895832413964305	-13.296932649512204	0.10926530147497074	0.8907346985250293	0.22255557449855992	0.09161967981235557	0.9083803201876444	0.8194428065906642
5	0.6636575475868031	0.28193532216940254	2.489587082075981	-13.296940330871305	0.11168536888226019	0.8883146311177399	0.2286633000037512	0.08968757543942545	0.9103124245605746	0.8238142800263418
6	0.6578547295786445	0.2771078746477873	2.489618399835657	-13.297002966390657	0.1141359654430746	0.8858640345569246	0.2349492695773492	0.08782263953222617	0.9121773604677754	0.8279944284706623
7	0.6520384835883557	0.27242393026585754	2.489682053495577	-13.297130273710497	0.11661114496611043	0.8833888550338869	0.24140830662340512	0.08602564471350443	0.9139743552865015	0.8319859655205586
8	0.6462209727569573	0.26790080000315986	2.48969570028557	-13.297157567290485	0.11910297066332198	0.8808970293366744	0.2480383136646581	0.08430443706428514	0.9156955629357232	0.8357862236520474
9	0.6404160653839828	0.26354062229109776	2.489680701261694	-13.297127569242727	0.12160430850092756	0.8783956914990687	0.2548316283633196	0.08265781076127494	0.9173421892387341	0.8394001041292538
10	0.6346366348397998	0.25934509247440485	2.4896527527700014	-13.297071672259346	0.12410802444514545	0.8758919755548513	0.261780588381601	0.08108455998118046	0.9189154400188282	0.842832508216303
11	0.6288945453517691	0.2553154747184224	2.489622653377901	-13.297011473475145	0.12660698446219393	0.8733930155378037	0.2688775313817138	0.07958347890070831	0.9204165210992993	0.8460883371773198
12	0.6232006435055212	0.2514526144311834	2.4895970577837883	-13.296960282286918	0.12909405451829134	0.8709059454817073	0.27611479502586933	0.07815336169656514	0.9218466383034413	0.8491724922764294
13	0.6175647551085983	0.24775695113888596	2.4895792112247497	-13.296924589168839	0.13156210057965595	0.8684378994203437	0.283484716976279	0.07679300254545757	0.923206997454548	0.8520898747777569
14	0.6119956870480028	0.24422853175582526	2.4895696592526804	-13.296905485224706	0.13400398861250606	0.8659960113874942	0.2909796348951544	0.07550119562409223	0.9244988043759133	0.8548453859454274
15	0.6065012337601061	0.24086702419228878	2.489566928843179	-13.296900024405698	0.13641258458306	0.8635874154169404	0.2985918864447068	0.07427673510917576	0.9257232648908308	0.8574439270435658
16	0.6010881879209101	0.23767173124631313	2.4895681776886454	-13.296902522096634	0.138780754457536	0.8612192455424639	0.30631380928714763	0.07311841517741477	0.9268815848225946	0.8598903993362971
17	0.595762354956805	0.2346416047275396	2.4895698092546246	-13.296905785228592	0.1411013642021524	0.858898635797846	0.3141377410846884	0.0720250300055159	0.9279749699944986	0.8621897040877465
18	0.5905285709707495	0.23177525976370295	2.4895680517891874	-13.296902270297714	0.1433672797831275	0.8566327202168682	0.32205601949954044	0.07099537377018578	0.9290046262298365	0.8643467425620391
19	0.5853907236761923	0.22907098924253178	2.4895595000065702	-13.296885166732483	0.1455713671666796	0.854428632833312	0.3300609821939152	0.07002824064813104	0.929971759351902	0.8663664160233
20	0.580343198744868	0.22653647980340885	2.4894145683458744	-13.29659530341109	0.14771662489839057	0.8522833751015945	0.338152934240574	0.06912527971230205	0.9308747202877418	0.8682454417464971
21	0.5753903693772068	0.22416623484589693	2.4891650262761322	-13.296096219271607	0.14979553221981046	0.8502044677801679	0.34632171152238717	0.06828360859630013	0.931716391403748	0.869990318246565
22	0.5705484162787731	0.22193750383006028	2.4890603381933536	-13.295886843106054	0.15178328744689043	0.8482167125530837	0.35454520074155776	0.06749546944132759	0.9325045305587231	0.8716217323617089
23	0.5658130767860825	0.2198495437118393	2.4890637648732623	-13.295893696465868	0.15367746419789993	0.8463225358020724	0.36282003179496014	0.0667599122838434	0.9332400877162085	0.8731419464422635
24	0.5611798550949945	0.2179014213959436	2.4891425517345214	-13.296051270188386	0.15547563609110843	0.844524363908864	0.37114283457946884	0.06607598716030653	0.9339240128397454	0.8745532228385634
25	0.5566440306508839	0.2160920211348205	2.4892679698956037	-13.296302106510549	0.15717537674478532	0.8428246232551885	0.37951023899195807	0.06544274410717595	0.934557255892875	0.8758578239009434
26	0.55220066578649	0.2144200519659698	2.489415353648183	-13.296596874015709	0.15877425977720008	0.8412257402227763	0.3879188749293023	0.0648592331609106	0.9351407668391387	0.8770580119797381
27	0.547844612571983	0.2128840551714667	2.489564132192424	-13.296894431104192	0.16026985880662217	0.8397301411933574	0.39636537228837604	0.06432450435796946	0.9356754956420779	0.8781560494252824
28	0.5435705188448113	0.21148241174425741	2.4896978538842705	-13.297161874487884	0.16165974745132103	0.8383402525486622	0.40484636096605353	0.06383760773481151	0.9361623922652337	0.8791541985879108
29	0.539372833390037	0.2102133498464831	2.4898042016613617	-13.297374570042065	0.1629414993295661	0.8370585006704205	0.41335847085920924	0.0633975933278957	0.9366024066721473	0.8800547218179581
30	0.5352458102451578	0.209074952245764	2.489874998740879	-13.297516164201099	0.16411268805962678	0.8358873119403627	0.4218983318647176	0.06300351117368098	0.9369964888263603	0.880859881465759
31	0.5311835121068275	0.20806516371603567	2.4899062041156714	-13.297578574950688	0.16517088725977258	0.834829112740219	0.43046257387945297	0.06265441130862634	0.9373455886914137	0.8815719398816482
32	0.5271798128204376	0.20718179839018236	2.489897897810418	-13.297561962340176	0.16611367054827295	0.8338863294517194	0.43904782680028975	0.06234934376919073	0.9376506562308489	0.8821931594159604
33	0.5232283989372122	0.2064225470523433	2.489854256292035	-13.297474679303411	0.1669386115433973	0.833061388456594	0.44765072052410226	0.06208735859183312	0.9379126414082071	0.8827258024190303
34	0.5193227703272777	0.20578498435839054	2.4897835188533	-13.297333204425943	0.16764328386341504	0.8323567161365732	0.45626788494776505	0.061867505813012466	0.9381324941870296	0.8831721312411926
35	0.5154562398411288	0.20526657597368647	2.489697946200912	-13.29716205912117	0.1682252611265957	0.8317747388733872	0.4648959499681524	0.06168883546918775	0.9383111645308577	0.8835344082327822
36	0.5116219320159893	0.20486468561781956	2.4896137728754058	-13.296993712470154	0.16868211695120866	0.8313178830487659	0.47353154548213877	0.06155039759681792	0.9384496024032328	0.8838148957441335
37	0.5078127808277885	0.20457658200659934	2.4895511555078134	-13.296868477734968	0.1690114249555234	0.8309885750444395	0.48217130138659847	0.061451242232361945	0.9385487577676961	0.8840158561255813
38	0.5040238379759638	0.20440645155105408	2.489452443154822	-13.296671053028987	0.16921692522314188	0.8307830747768105	0.4908062236653885	0.06139258266072162	0.9386074173393428	0.8841342365799578
39	0.5002476050396224	0.20435693686712442	2.489278443129807	-13.296323052978959	0.16930153543163864	0.8306984645683131	0.4994339756280097	0.06137511998697542	0.9386248800130892	0.8841679915929539
40	0.49646938049907857	0.20441178103770474	2.4892166846180768	-13.296199535955498	0.16925100059891685	0.8307489994010347	0.5080685193765935	0.061393806675126	0.9386061933249387	0.8841294546885117
41	0.49268145262060525	0.20457394424366604	2.4892355819406884	-13.296237330600722	0.16906767612462392	0.8309323238753278	0.5167065401736969	0.06144959337282738	0.9385504066272373	0.8840163972465819
42	0.48887630565243423	0.2048463131636823	2.489307306884503	-13.296380780488347	0.16875391740840734	0.8312460825915448	0.5253447232818775	0.06154343072773352	0.9384565692723311	0.883826590647115
43	0.48504661443590147	0.20523169447586165	2.489407839118406	-13.296581844956158	0.1683120798499145	0.8316879201500382	0.5339797539636927	0.06167626938749845	0.9383237306125662	0.8835578062700618
44	0.4811852399192711	0.20573280823136375	2.489517021085361	-13.296800208890064	0.16774451884879285	0.8322554811511604	0.5426083174816995	0.06184905999977615	0.9381509400002885	0.8832078154953728
45	0.4772852255904464	0.2063522811078926	2.4896186143776626	-13.297003395474666	0.16705358980468984	0.8329464101952642	0.5512270990984554	0.06206275321222061	0.9379372467878442	0.8827743897029985
46	0.47333979484033634	0.20709263955148904	2.4897003549239196	-13.297166876567182	0.1662416481172529	0.8337583518827016	0.5598327840765176	0.062318299672485825	0.9376817003275791	0.8822553002728896
47	0.4693423492643269	0.2079563028155873	2.4897540046521227	-13.297274176023587	0.16531104918612943	0.8346889508138254	0.5684220576784434	0.0626166500282258	0.9373833499718395	0.8816483185849967
48	0.46528646790511485	0.20894557590685925	2.4897753976475414	-13.297316962014428	0.1642641484109669	0.8357358515889881	0.5769916051667904	0.06295875492709452	0.9370412450729713	0.8809512160192705
49	0.46116590743609154	0.21006264244793893	2.489764479198617	-13.297295125116579	0.16310330119141273	0.8368966988085421	0.5855381118041155	0.06334556501674599	0.9366544349833205	0.8801617639556615
50	0.45697460328051565	0.21130955746770552	2.4897253365179868	-13.297216839755315	0.16183086292711435	0.8381691370728399	0.5940582628529762	0.0637780309448342	0.9362219690552331	0.8792777337741202
51	0.45270667165789413	0.21268824013039977	2.4896662203373143	-13.29709860739397	0.16044918901771923	0.8395508109822339	0.60254874357593	0.06425710335901313	0.9357428966410555	0.8782968968545974
52	0.44835641254528935	0.2142004664154623	2.489599557000342	-13.296965280720029	0.15896063486287476	0.8410393651370767	0.6110062392355339	0.0647837329069368	0.9352162670931332	0.8772170245770438
53	0.4439183135376943	0.21584786176060078	2.4895419511144317	-13.296850068948206	0.15736755586222842	0.8426324441377206	0.6194274350943453	0.06535887023625919	0.9346411297638126	0.8760358883214097
54	0.4393878424128169	0.2176314475467075	2.4895136233055206	-13.296793413330384	0.15567340312779512	0.8443265968721512	0.6278081686162494	0.06598302293088304	0.934016977069191	0.8747510864390652
55	0.43476830045308984	0.21955110761629582	2.489505936765082	-13.29677804024951	0.15389150598139148	0.8461084940185559	0.6361363765606562	0.06665417796022724	0.9333458220398475	0.8733571821910213
56	0.4300468179719201	0.22161842933955145	2.489505013186598	-13.29677619309254	0.15201216604202836	0.8479878339579201	0.6444173466520778	0.06738095954006228	0.9326190404600134	0.8718512365916794
57	0.4252228784261526	0.22383662470940857	2.489504598701889	-13.296775364123121	0.15004244852212054	0.8499575514778288	0.6526433939506874	0.06816462398875914	0.9318353760113175	0.8702283375310795
58	0.4202967687462523	0.22620865849643013	2.489500962820056	-13.296768092359457	0.1479894186340828	0.8520105813658674	0.6608068335166578	0.06900642762468885	0.9309935723753888	0.8684835728992619
59	0.41526960926662976	0.22873723358792186	2.4894925613114154	-13.296751289342174	0.14586014159032992	0.8541398584096211	0.6688999804101624	0.06990762676622246	0.9300923732338563	0.8666120305862667
60	0.4101433826662085	0.23142477623280844	2.489479662471905	-13.296725491663157	0.1436616826032767	0.8563383173966752	0.6769151496913743	0.07086947773173098	0.9291305222683489	0.864608798482134
61	0.40492096154507634	0.23427342122932404	2.489463935561276	-13.296694037841899	0.14140110688533786	0.8585988931146148	0.6848446564204665	0.07189323683958544	0.9281067631604957	0.862468964476904
62	0.39960613425237557	0.23728499709464856	2.4894480007005084	-13.29666216812036	0.13908547964892826	0.8609145203510253	0.6926808156576124	0.07298016040815686	0.9270198395919256	0.860187616460617
63	0.39420362857247854	0.24046101125777075	2.4894349399889286	-13.296636046697198	0.13672186610646264	0.8632781338934918	0.7004159424629847	0.07413150475581624	0.9258684952442676	0.857759842323313
64	0.388719132870961	0.243802635319048	2.489427770066561	-13.296621706852466	0.13431733147035574	0.8656826685295996	0.7080423518967568	0.07534852620093466	0.9246514737991507	0.8551807299550322
65	0.38315931429893757	0.2473106904221849	2.4894288768148085	-13.296623920348962	0.13187894095302238	0.868121059046934	0.7155523590191017	0.07663248106188311	0.9233675189382038	0.8524453672458149
66	0.3775318336539421	0.2509856327866473	2.489439413376102	-13.296644993471546	0.12941375976687736	0.8705862402330802	0.7229382788901927	0.07798462565703261	0.922015374343056	0.8495488420857011
67	0.37184535649774236	0.2548275394508823	2.489458663204025	-13.296683493127393	0.12692885312433544	0.8730711468756233	0.7301924265702027	0.07940621630475421	0.9205937836953362	0.8464862423647311
68	0.36610956013625645	0.2588360942791119	2.4894833704592676	-13.296732907637878	0.12443128623781137	0.8755687137621487	0.737307117119305	0.08089850932341892	0.9191014906766733	0.8432526559729451
69	0.360335136074099	0.26301057428693375	2.489507040778924	-13.296780248277193	0.12192812431971997	0.8780718756802416	0.7442746655976724	0.08246276103139774	0.9175372389686964	0.839843170800383
70	0.3545337875662158	0.2673498363434562	2.4895192163086106	-13.296804599336564	0.11942643258247601	0.8805735674174872	0.7510873870654785	0.08410022774706175	0.9158997722530345	0.8362528747370852
71	0.34870987301022427	0.27184098241717913	2.489626982731818	-13.297020132182979	0.11692903768090405	0.8830709623190606	0.7577461166733724	0.08580629767943183	0.914193702320667	0.832483933765166
72	0.34289012882289654	0.276494677475277	2.4896495432639343	-13.297065253247212	0.1144512270633902	0.8855487729365755	0.7642316463117674	0.08758785155929877	0.9124121484408025	0.8285223939140371
73	0.3370871314826813	0.2813032894660722	2.48960511632139	-13.296976399362123	0.11199913090707506	0.8880008690928914	0.7705390761054416	0.08944324542454199	0.9105567545755617	0.8243663965375109
74	0.331311717052215	0.2862563235683946	2.4895343879157954	-13.296834942550934	0.10957756522529138	0.8904224347746759	0.7766657478238512	0.091369445057464	0.9086305549426421	0.8200159383548223
75	0.32557526214116006	0.2913432915454296	2.4894679178796686	-13.296702002478678	0.10719134603137183	0.892808653968596	0.7826090032364528	0.09336341624036741	0.9066365837597411	0.8154710160852066
76	0.3198896587857952	0.2965537411496806	2.489425713235957	-13.296617593191256	0.10484528933864914	0.8951547106613192	0.7883661841127025	0.09542212475555474	0.9045778752445561	0.8107316264478985
77	0.31426728647971924	0.30187728462135144	2.489416873119981	-13.296599912959305	0.10254421116045606	0.8974557888395129	0.793934632222057	0.09754253638532852	0.9024574636147848	0.8057977661621335
78	0.3087209813039924	0.3073036262378891	2.489439302740224	-13.296644772199791	0.10029292751012524	0.8997070724898446	0.7993116893339723	0.09972161691199133	0.9002783830881246	0.8006694319471462
79	0.3032640021170089	0.31282258887644065	2.489479496372585	-13.29672515946451	0.09809625440098943	0.9019037455989816	0.804494697217905	0.10195633211784572	0.8980436678822729	0.7953466205221721
80	0.29790999377678207	0.3184241395549852	2.489512392174383	-13.296790951068107	0.09595900784638134	0.9040409921535911	0.8094809976433115	0.10424364778519421	0.8957563522149273	0.789829328606446
81	0.29266587743958417	0.32409322401213303	2.48957664162928	-13.296919449977901	0.09388220111223569	0.9061177988877385	0.814272763484302	0.10657797452648174	0.8934220254736445	0.7841222450696226
82	0.2875481311191974	0.32982084439818027	2.4896066658840708	-13.296979498487488	0.09187233257721035	0.9081276674227651	0.8188662030271233	0.10895602916346628	0.8910439708366642	0.7782243808135426
83	0.2825677851852967	0.3355943038713162	2.4895847369367967	-13.296935640592936	0.08993268911355583	0.9100673108864203	0.8232612127308763	0.1113726555630303	0.8886273444371033	0.7721386080278304
84	0.2777300493394085	0.3413977421775805	2.48954162418978	-13.296849415098901	0.08806346937688989	0.9119365306230868	0.8274614252913549	0.11382084191977324	0.8861791580803628	0.7658714544739218
85	0.2730398384493111	0.3472161666788811	2.489498861574436	-13.296763889868213	0.08626487202283017	0.9137351279771468	0.8314704734043533	0.11629357642829455	0.883706423571844	0.7594294479132527
86	0.26850176996756936	0.3530354841998223	2.4894694308349434	-13.29670502838923	0.0845370957069943	0.9154629042929832	0.8352919897656657	0.11878384728319379	0.8812161527169476	0.7528191161072588
87	0.2641201619045561	0.3588425268815345	2.4894584736786483	-13.29668311407664	0.08288033908500005	0.9171196609149783	0.838929607071086	0.12128464267907033	0.878715357321075	0.7460469868173761
88	0.2598990313465318	0.36462507230107055	2.489464023701011	-13.296694214121366	0.08129480081246501	0.9187051991875146	0.8423869580164083	0.12378895081052368	0.876211049189627	0.7391195878050405
89	0.2558420935091401	0.37037185813705825	2.4894777511433155	-13.296721669005976	0.07978067954500688	0.9202193204549746	0.8456676752974269	0.12628975987215338	0.8737102401280048	0.7320434468316875
90	0.25195276131647004	0.3760725916822827	2.4894857152533394	-13.296737597226024	0.07833817393824336	0.9216618260617409	0.8487753916099358	0.12878005805855883	0.8712199419416095	0.7248250916587535
91	0.24823302909672873	0.38171870384870304	2.489472076654292	-13.296710320027927	0.07696673884851464	0.9230332611514717	0.8517140624374597	0.1312538566720219	0.8687461433281558	0.717470879115976
92	0.2446814234622814	0.38729843091137167	2.489462881990966	-13.296691930701275	0.07566474664590543	0.9243352533540808	0.8544901686781089	0.13370195398757095	0.866298046012611	0.7099910413852837
93	0.24129809896478305	0.392801857388949	2.4894654846393074	-13.29669713599796	0.07443153513883369	0.925568464861153	0.8571089635733413	0.13611498540154843	0.8638850145986374	0.7023946028704917
94	0.2380819456337817	0.39822306318548023	2.4894747095622085	-13.29671558584376	0.07326545323429304	0.9267345467656941	0.8595752892606613	0.13848669004367117	0.8615133099565184	0.6946887252121954
95	0.23503147711947303	0.40355701041599873	2.4894855940702074	-13.296737354859758	0.07216484983927704	0.9278351501607106	0.8618939878775735	0.14081080704365614	0.8591891929565374	0.6868805700509892
96	0.2321448478392243	0.4087995266600214	2.4894938845278647	-13.296753935775072	0.07112807386077927	0.9288719261392088	0.8640699015615826	0.14308107553122035	0.8569189244689772	0.6789772990274684
97	0.22941987015759846	0.4139472858660099	2.4894964932199466	-13.296759153159236	0.07015347420579335	0.9298465257941948	0.8661078724501929	0.14529123463608062	0.8547087653641215	0.6709860737822281
98	0.22685403154342054	0.41899778723155506	2.489491914832583	-13.29674999638451	0.06923939978131283	0.930760600218675	0.8680127426809091	0.14743502348795395	0.8525649765122534	0.662914055955863
99	0.22444451165058055	0.42394933238157756	2.489480602427574	-13.296727371574491	0.06838419949433132	0.9316158005056556	0.8697893543912357	0.14950618121655732	0.850493818783656	0.654768407188968
100	0.22218819927233646	0.4288010011624863	2.4894653032319605	-13.29669677318326	0.06758622225184241	0.932413777748143	0.8714425497186774	0.15149844695160755	0.8485015530486127	0.6465562891221385
101	0.2200878199350882	0.4335560459546367	2.4893784476458656	-13.296523062011072	0.06684575520942514	0.9331542447905582	0.8729723663260703	0.15341082095031736	0.8465891790499099	0.6382819448898434
102	0.21815885335383112	0.43822466529587434	2.4889996839838515	-13.295765534687048	0.06616699561696639	0.9338330043830165	0.8743684392774366	0.1552541617447208	0.844745838255508	0.629944245432399
103	0.21635770160759937	0.44278711377333857	2.4888070315160737	-13.295380229751489	0.06553544042911924	0.9344645595708634	0.8756663482256681	0.15698963295350865	0.8430103670467219	0.6215680284305686
104	0.21468432695712258	0.4472498858826823	2.488758552415404	-13.295283271550149	0.06495057627461509	0.9350494237253674	0.8768672879318079	0.1586159970432271	0.8413840029570057	0.6131558676954263
105	0.21313855995583542	0.4516195327470941	2.488816522354239	-13.295399211427823	0.06441188978218533	0.9355881102177971	0.8779724531568991	0.16013201648042227	0.8398679835198128	0.6047103370380459
106	0.2117201027872253	0.4559026617000565	2.4889474030332597	-13.29566097278586	0.0639188675805614	0.936081132419421	0.8789830386619846	0.16153645373164024	0.8384635462685974	0.5962340102695022
107	0.21042853266635442	0.46010593656174853	2.4891218231286194	-13.296009812976584	0.06347099629847468	0.9365290037015079	0.8799002392081076	0.16282807126342716	0.8371719287368131	0.587729461200869
108	0.20926330529914194	0.4642360786025143	2.4893145645320462	-13.296395295783437	0.06306776256465657	0.9369322374353262	0.8807252495563108	0.16400563154232917	0.8359943684579136	0.5791992636432204
109	0.20822375839316232	0.468299868185338	2.4895045512285874	-13.296775269176518	0.06270865300783851	0.9372913469921444	0.8814592644676376	0.16506789703489236	0.8349321029653529	0.570645991407631
110	0.20730911521390483	0.47230414707775026	2.4896748386094965	-13.297115843938336	0.0623931542567519	0.9376068457432313	0.8821034787031309	0.16601363020766288	0.8339863697925846	0.5620722183051747
111	0.20651848818061058	0.4762558214220516	2.4898126014588	-13.297391369636939	0.06212075294012812	0.9378792470598551	0.8826590870238336	0.16684159352718686	0.8331584064730626	0.5534805181469256
112	0.20585088249597971	0.48016186535117167	2.489909119284885	-13.297584405289113	0.06189093568669861	0.9381090643132847	0.8831272841907888	0.16755054946001038	0.8324494505402407	0.5448734647439581
113	0.20530519980421602	0.4840293252358945	2.489959758094497	-13.297685682908337	0.061703189125194756	0.9382968108747886	0.8835092649650396	0.16813926047267963	0.8318607395275726	0.5362536319073464
114	0.20488024187204412	0.48786532454755394	2.4899639481261113	-13.297694062971567	0.06155699988434797	0.9384430001156351	0.883806224107629	0.1686064890317407	0.8313935109685121	0.5276235934481645
115	0.20457471428750418	0.49167706931866506	2.489925157471915	-13.297616481663173	0.061451854592889675	0.9385481454070931	0.8840193563795999	0.1689509976037397	0.831049002396513	0.5189859231774867
116	0.2043872301714983	0.4954718541822811	2.489850861921302	-13.297467890561947	0.06138723987955126	0.938612760120431	0.8841498565419956	0.16917154865522277	0.8308284513450293	0.5103431949063872
117	0.20431631389722138	0.4992570689691678	2.4897525117526866	-13.297271190224716	0.061362642373064144	0.9386373576269175	0.8841989193558588	0.16926690465273606	0.8307330953475145	0.5016979824459402
118	0.20436040481277618	0.503040205840163	2.48964549658338	-13.297057159886105	0.06137754870215972	0.9386224512978208	0.8841677395822328	0.16923582806282564	0.8307641719374226	0.4930528596072197
119	0.20451786096243252	0.5068288669293359	2.4895491097592233	-13.29686438623779	0.06143144549556942	0.93856855450441	0.8840575119821605	0.16907708135203767	0.8309229186482072	0.4844104002013001
120	0.2047869628021446	0.5106307724717867	2.489486514127197	-13.296739194973735	0.06152381938202463	0.9384761806179532	0.8838694313166849	0.1687894269869183	0.8312105730133224	0.4757731780392556
121	0.20517174556689866	0.5144510938531832	2.489414052752439	-13.296594272224223	0.06165591792986406	0.9383440820701128	0.8836001907731255	0.16837722799236268	0.8316227720078748	0.4671487393657384
122	0.2056733008618563	0.5182996764934745	2.4893320755895187	-13.29643031789838	0.06182824171812676	0.9381717582818501	0.8832488884348626	0.16784089394075796	0.8321591060594791	0.4585341001083885
123	0.20628646969508047	0.5221885188149297	2.4893203673810387	-13.296406901481419	0.06203941411083926	0.9379605858891374	0.8828193714398932	0.16717493471678901	0.8328250652834469	0.44992323457680183
124	0.20701486890823495	0.5261242844967053	2.4893537764030444	-13.29647371952543	0.062290703104875056	0.9377092968951015	0.8823085820162551	0.16638270986587872	0.8336172901343556	0.4413203773328136
125	0.2078620107690371	0.5301133711357484	2.489411043599178	-13.296588253917701	0.06258337669710763	0.9374166233028688	0.8817134623919859	0.16546757893345	0.8345324210667824	0.4327297629382597
126	0.20883129369702202	0.5341619071808158	2.4894748554291013	-13.296715877577544	0.0629187028844105	0.9370812971155658	0.8810309547951237	0.16443290146492573	0.8355670985353044	0.4241556259549756
127	0.20992599276521773	0.5382757477136402	2.4895318912954947	-13.296829949310329	0.06329794966365715	0.9367020503363189	0.8802580014537064	0.1632820370057288	0.836717962994499	0.41560220094479644
128	0.21114924999176765	0.5424604691035789	2.4895728626689566	-13.296911892057256	0.06372238503172106	0.9362776149682549	0.8793915445957717	0.1620183451012821	0.8379816548989432	0.4070737224695582
129	0.21250406443659198	0.5467213625692897	2.4895925413979274	-13.296951249515198	0.06419327698547574	0.9358067230145	0.8784285264493574	0.16064518529700855	0.8393548147032144	0.3985744250910962
130	0.21399328211926782	0.5510634266878546	2.4895897750824023	-13.296945716884148	0.0647118935217947	0.935288106478181	0.8773658892425016	0.15916591713833098	0.8408340828618898	0.3901085433712458
131	0.21561958577543305	0.5554913588983359	2.4895674878026854	-13.296901142324714	0.06527950263755139	0.9347204973624241	0.8762005752032419	0.15758390017067236	0.8424160998295466	0.3816803118718427
132	0.2173854844701658	0.5600095460529882	2.4895326649230585	-13.29683149656546	0.06589737232961934	0.9341026276703561	0.8749295265596162	0.15590249393945552	0.844097506060762	0.37329396515472246
133	0.219293303087989	0.564622054075264	2.4894963211282386	-13.29675880897582	0.06656677059487205	0.9334332294051034	0.8735496855396624	0.15412505799010337	0.8458749420101132	0.36495373778172036
134	0.22134517172036206	0.5693326167893507	2.489473451290193	-13.29671306929973	0.06728896543018299	0.9327110345697925	0.8720579943714184	0.1522549518680388	0.8477450481321774	0.3566638643146721
135	0.22352802993531196	0.5741421715667628	2.489589438217995	-13.29694504315533	0.06805585256631329	0.9319441474336622	0.8704553984746114	0.150301860058973	0.8496981399412405	0.348428109956798
136	0.22586661149381937	0.5790526204091289	2.4896764532131224	-13.29711907314559	0.0688816743744871	0.9311183256254881	0.8687304260921597	0.14826521667844236	0.8517347833217674	0.34025559990945836
137	0.2283681916193735	0.5840637034369742	2.4897012223498756	-13.297168611419096	0.06977054688168723	0.9302294531182876	0.8668768906408099	0.14615020936459494	0.8538497906356112	0.33215413688094375
138	0.23103403285185564	0.5891737302179185	2.4896751723233645	-13.297116511366074	0.07072311919569085	0.9292768808042836	0.864890318506855	0.14396401734527461	0.8560359826549278	0.3241310549022204
139	0.23386512237816703	0.5943801202178699	2.4896108599968487	-13.29698788671304	0.0717400404242751	0.928259959575699	0.8627662360765878	0.1417138198483253	0.8582861801518732	0.3161936880042542
140	0.23686216143365235	0.5996793773935316	2.4895214487928694	-13.296809064305084	0.0728219596752171	0.9271780403247565	0.8605001697363013	0.13940679610159099	0.8605932038986037	0.3083493702180117
141	0.24002555491643696	0.6050670667794127	2.489420154558541	-13.296606475836423	0.07396952605629396	0.9260304739436792	0.8580876458722884	0.13705012533291558	0.8629498746672752	0.30060543557445885
142	0.24335540124406163	0.6105377934730659	2.4893196617232967	-13.296405490165938	0.07518338867528286	0.9248166113246897	0.855524190870842	0.13465098677014298	0.8653490132300439	0.29296921810456183
143	0.24685148248278022	0.6160851844249378	2.4892315107964844	-13.296229188312312	0.07646419663996093	0.9235358033600111	0.8528053311182549	0.13221655964111712	0.8677834403590657	0.2854480518392868
144	0.25051325478087727	0.6217018734393385	2.489165458500988	-13.29609708372132	0.07781259905810528	0.9221874009418661	0.8499265930008201	0.12975402317368195	0.870245976826497	0.27804927080960007
145	0.2543398391383703	0.6273794897906209	2.4891288121379613	-13.296023790995264	0.07922924503749305	0.9207707549624777	0.8468835029048305	0.1272705565956814	0.8727294434044935	0.2707802090464677
146	0.2583300125464735	0.6331086508536944	2.4891257401617866	-13.296017647042916	0.0807147836859014	0.9192852163140688	0.843671587216579	0.12477333913495933	0.8752266608652116	0.2636482005808559
147	0.26248219953123575	0.6388789591405072	2.489156561453709	-13.296079289626762	0.08226986411110744	0.9177301358888621	0.8402863723223585	0.12226955001935978	0.8777304499808071	0.2566605794437309
148	0.26679446413680574	0.6446790041240857	2.4892170164617164	-13.296200199642776	0.0838951354208883	0.9161048645790805	0.8367233846084619	0.11976636847672661	0.8802336315234363	0.2498246796660588
149	0.27126450238483046	0.6504963692191428	2.489297524271149	-13.29636121526164	0.08559124672302115	0.9144087532769469	0.832978150461182	0.11727097373490372	0.8827290262652552	0.24314783527880574
150	0.2758896352475684	0.6563176442731461	2.489382430835388	-13.29653102839012	0.08735884712528309	0.9126411528746843	0.8290461962668119	0.11479054502173511	0.8852094549784197	0.23663738031293802
151	0.2806668021733717	0.6621284439040789	2.489449255078708	-13.296664676876757	0.08919858573545125	0.9108014142645154	0.8249230484116444	0.11233226156506469	0.8876677384350863	0.2303006487994218
152	0.2855904261936011	0.667915451426254	2.4894932215790426	-13.296752609877426	0.09111005200551696	0.9088899479944491	0.8206057550659048	0.10990221417767351	0.8900977858224735	0.22414319652218326
153	0.29064656281293455	0.6736704492705183	2.489585814701366	-13.296937796122076	0.09308830522377476	0.9069116947761906	0.8160965535264356	0.10750402733273172	0.892495972667411	0.21816460985333241
154	0.29583810013375944	0.6793671615748381	2.489580091872985	-13.296926350465313	0.09513683957599697	0.9048631604239675	0.8113853565394432	0.10515051305333264	0.8948494869468063	0.21237953225841555
155	0.3011509925617578	0.6849957737300755	2.4895251267838017	-13.296816420286945	0.09725098616208354	0.9027490138378801	0.8064745844290931	0.10284486571609397	0.8971551342840417	0.2067881939721023
156	0.3065714652153172	0.6905462466443253	2.4894584492927816	-13.296683065304908	0.09942607608193424	0.9005739239180283	0.8013666575195513	0.10059027969763344	0.899409720302499	0.20139082522906263
157	0.3120860561973549	0.6960083406500823	2.4894059791822007	-13.296578125083743	0.10165744043544901	0.8983425595645125	0.7960639961349834	0.09838994937456874	0.9016100506255607	0.1961876562639662
158	0.3176816560872463	0.7013716406356173	2.489382047653839	-13.29653026202702	0.10394041032252778	0.8960595896774327	0.790569020599555	0.0962470691235175	0.9037529308766087	0.1911789173114827
159	0.3233455446455792	0.706625582377879	2.4893894979451954	-13.296545162609736	0.10627031684307034	0.893729683156889	0.7848841512374319	0.0941648333210975	0.9058351666790253	0.18636483860628206
160	0.329065424736811	0.7117594800496095	2.4894198594572794	-13.296605885633898	0.10864249109697664	0.8913575089029818	0.7790118083727798	0.09214643634392637	0.9078535636561929	0.1817456503830339
161	0.3348294534869115	0.7167625548687392	2.4894535927732484	-13.296673352265842	0.11105226418414646	0.8889477358158112	0.7729544123297646	0.09019507256862189	0.9098049274314931	0.17732158287640817
162	0.34062524874234257	0.7216260539085803	2.4894798531656237	-13.296725873050589	0.11349456999196723	0.8865054300079898	0.7667155454930895	0.08831278095346816	0.9116872190466426	0.17309161982698532
163	0.3464382865095796	0.7263439342710873	2.4895110692406854	-13.296788305200714	0.11596263580068865	0.8840373641992675	0.7603010965014144	0.08650046049129262	0.9134995395088151	0.16905272564191579
164	0.35225673267162116	0.7309051788151687	2.4895057207136837	-13.296777608146712	0.1184502028197705	0.8815497971801846	0.7537144798725705	0.08476185966349356	0.9152381403366117	0.16520481185024494
165	0.3580663473184685	0.7353069239678021	2.489484403986574	-13.296734974692491	0.1209499343690654	0.8790500656308884	0.746963195468304	0.0830962559092536	0.9169037440908494	0.1615432931922882
166	0.3638538951045978	0.7395467022880159	2.4894611550834824	-13.296688476886308	0.12345449376842568	0.8765455062315268	0.7400547431503622	0.08150292666775555	0.9184970733323454	0.15806358440836124
167	0.36960716174039543	0.7436224349345568	2.489444225793636	-13.296654618306619	0.1259565443377037	0.8740434556622476	0.7329966227804923	0.0799811493781822	0.9200188506219168	0.15476110023877993
168	0.3753149645441619	0.7475324235750717	2.4894368552146426	-13.296639877148628	0.12844874939675205	0.8715512506031982	0.7257963342204402	0.07853020147971616	0.9214697985203807	0.15163125542385958
169	0.380967157414309	0.7512753417793254	2.489438030047105	-13.296642226813553	0.1309237722654231	0.8690762277345263	0.7184613773319535	0.07714936041154027	0.9228506395885543	0.148669464703916
170	0.38655463059880846	0.7548502259377177	2.4894432284143457	-13.296652623548031	0.13337427626356915	0.8666257237363796	0.7109992519767789	0.07583790361283729	0.9241620963872546	0.14587114281926494
171	0.39206930565365694	0.7582564657450902	2.489445143097737	-13.296656452914817	0.13579292471104285	0.8642070752889057	0.703417458016663	0.07459510852278986	0.9254048914772988	0.1432317045102218
172	0.3975052863874723	0.7614938319927758	2.489427639354272	-13.296621445427885	0.13817369171259505	0.8618263082873532	0.6957226975339358	0.07342001274826593	0.9265799872518199	0.14074691667693423
173	0.4028544766884389	0.7645653600576277	2.489412510139039	-13.29659118699742	0.14050799876490147	0.8594920012350455	0.6879249041458445	0.07231056917235464	0.92768943082773	0.1384103812025525
174	0.4081098613669978	0.7674736914175482	2.4894176443714997	-13.29660145546234	0.14278662054134564	0.8572133794586003	0.6800335649509842	0.07126519621028923	0.928734803789794	0.13621599490601796
175	0.4132690306747622	0.7702207426055137	2.489432614540764	-13.296631395800869	0.1450041040380456	0.8549958959618994	0.6720550975924462	0.07028222115820619	0.9297177788418757	0.13415927643948855
176	0.41833029656031656	0.7728087520781675	2.489449036327711	-13.296664239374767	0.14715499625111939	0.8528450037488247	0.6639959197133221	0.06935997131224199	0.9306400286878386	0.13223574445512215
177	0.4232926722653421	0.7752402637578775	2.489460891662283	-13.296687950043907	0.14923384417668528	0.8507661558232579	0.6558624489567022	0.068496773968533	0.9315032260315464	0.13044091760507642
178	0.42815585103579423	0.7775181106713085	2.4894648155017416	-13.296695797722826	0.15123519481086134	0.8487648051890808	0.6476611029656779	0.0676909564232157	0.9323090435768628	0.12877031454150922
179	0.4329201841895878	0.7796453987308334	2.489460346686183	-13.296686860091711	0.15315359514976568	0.8468464048501756	0.6393982993833408	0.06694084597242655	0.9330591540276514	0.12721945391657846
180	0.43758665877589914	0.7816254907023098	2.489450143627823	-13.29666645397499	0.1549835921895165	0.8450164078104239	0.6310804558527813	0.06624476991230194	0.9337552300877757	0.1257838543824418
181	0.4421568750535629	0.7834619904000478	2.489440166027837	-13.296646498775017	0.15671973292623184	0.8432802670737074	0.622713990017091	0.06560105553897834	0.9343989444610995	0.12445903459125716
182	0.44663950310530903	0.7851433523299771	2.4892638437189056	-13.296293854157152	0.15836856837219784	0.8416314316277412	0.6142994740429409	0.06501296136753514	0.9349870386325426	0.12325228498738
183	0.45103343728958367	0.7866817245520346	2.489025463196536	-13.295817093112415	0.15991897656520837	0.8400810234347311	0.6058460925021277	0.06447601502457975	0.9355239849754972	0.12215310085424926
184	0.45533636112207876	0.7880982822260676	2.4889298793104553	-13.295625925340252	0.1613534834614962	0.8386465165384432	0.5973645558005074	0.06398296913999102	0.936017030860085	0.12114434761674107
185	0.45955557013561815	0.7893928946668981	2.4889402880307623	-13.295646742780866	0.16267131279305574	0.8373286872068832	0.5888571079363003	0.06353350442360432	0.9364664955764708	0.12022528255183597
186	0.4636983569435707	0.7905655383981156	2.489024056490579	-13.295814279700497	0.16387168829188128	0.836128311708057	0.5803259929077281	0.06312730158525508	0.9368726984148191	0.11939516293651452
187	0.4677720153457363	0.7916162952706571	2.489152694827834	-13.296071556375011	0.1649538336899671	0.8350461663099703	0.5717734547130124	0.06276404133477873	0.9372359586652946	0.11865324604775734
188	0.4717838449743094	0.7925453505228724	2.489301835592352	-13.296369837904049	0.16591697271930758	0.8340830272806288	0.5632017373503737	0.06244340438201064	0.9375565956180619	0.11799878916254494
189	0.47574115646242476	0.793352990785436	2.489451218036618	-13.296668602792577	0.16676032911189703	0.8332396708880383	0.5546130848180336	0.06216507143678626	0.9378349285632857	0.11743104955785794
190	0.479651277116903	0.7940396020344054	2.489584675056933	-13.296935516833207	0.16748312659972972	0.8325168734002046	0.5460097411142136	0.06192872320894101	0.9380712767911303	0.11694928451067688
191	0.48352155707590355	0.7946056674956541	2.4896901209844104	-13.29714640868816	0.16808458891480008	0.8319154110851336	0.5373939502371343	0.06173404040831029	0.9382659595917606	0.11655275129798232
192	0.48735937593128315	0.7950517655038468	2.4897595388472613	-13.297285244413866	0.16856393978910233	0.8314360602108307	0.5287679561850174	0.061580703744729515	0.9384192962553412	0.11624070719675483
193	0.4911721497945398	0.7953785673190603	2.489788966139872	-13.297344098999087	0.16892040295463087	0.831079597045302	0.5201340029560843	0.06146839392803411	0.9385316060720365	0.11601240948397501
194	0.4949673387842884	0.7955868349040867	2.4897784785416404	-13.297323123802624	0.16915320214337998	0.830846797856553	0.5114943345485556	0.06139679166805948	0.9386032083320113	0.1158671154366234
195	0.4987524549122751	0.7956774186653962	2.489732171429961	-13.297230509579265	0.16926156108734397	0.8307384389125898	0.5028511949606529	0.061365577674641056	0.9386344223254302	0.11580408233168057
196	0.5025350703439928	0.7956512551606705	2.489658139426891	-13.297082445573125	0.16924470351851723	0.8307552964814179	0.49420682819059775	0.061374432657614233	0.9386255673424577	0.11582256744612712
197	0.5063228260089995	0.7955093647757591	2.489568454607686	-13.296903075934717	0.169101853168894	0.8308981468310431	0.4855634782366107	0.06142303732681443	0.9385769626732585	0.11592182805694358
198	0.5101234405350744	0.795252849373845	2.4894791443814386	-13.29672445548222	0.16883223377046866	0.8311677662294713	0.47692338909691334	0.06151107239207708	0.9384889276079973	0.11610112144111054
199	0.5139447194793748	0.7948828899195501	2.489410170430161	-13.296586507579661	0.16843506905523553	0.8315649309447081	0.46828880476972734	0.06163821856323757	0.9383617814368385	0.11635970487560854
200	0.5177919699137092	0.7943975267044058	2.4893434486255774	-13.296453063970496	0.16791330199142168	0.8320866980085251	0.45966694818549425	0.061805073796891395	0.9381949262031862	0.11669941991460756
201	0.5216714475412141	0.793793602104427	2.4892519195193987	-13.296270005758139	0.16727039712726424	0.8327296028726823	0.45106213187877	0.06201270753019902	0.9379872924698788	0.11712296150244064
202	0.5255979621702205	0.7930768951927487	2.4892329688991692	-13.296232104517681	0.16649869365752681	0.8335013063424199	0.44246258812099065	0.062259729201261826	0.9377402707988163	0.11762579572168819
203	0.5295778935161312	0.7922435753233855	2.489261221866358	-13.29628861045206	0.1656018762596808	0.8343981237402665	0.4338728834662479	0.0625474911658573	0.9374525088342212	0.11821122291142003
204	0.5336173245167349	0.791289924046809	2.489315201211654	-13.296396569142651	0.1645836296111977	0.8354163703887503	0.42529758446863436	0.06287734577976288	0.9371226542203162	0.11888254341070596
205	0.5377220357527799	0.7902123451728335	2.489377373662692	-13.296520914044725	0.163447638389549	0.8365523616103998	0.4167412576822426	0.06325064539875601	0.9367493546013236	0.11964305755861579
206	0.5418974986923482	0.7890073750917327	2.489434188799229	-13.296634544317797	0.1621975872722061	0.8378024127277435	0.40820846966116436	0.06366874237861417	0.936331257621466	0.12049606569421935
207	0.5461488678007982	0.7876716933376613	2.4894761075852205	-13.296718381889786	0.1608371609366405	0.8391628390633098	0.39970378695949216	0.06413298907511482	0.935867010924966	0.12144486815658642
208	0.5504809715663441	0.7862021333772202	2.4894976178448447	-13.296761402409032	0.15937004406032368	0.8406299559396272	0.39123177613131865	0.06464473784403538	0.9353552621560461	0.12249276528478681
209	0.554898302499218	0.7845956936047348	2.4894972344109085	-13.296760635541162	0.15779992132072707	0.8422000786792241	0.38279700373073555	0.06520534104115334	0.9347946589589289	0.12364305741789036
210	0.5594050061698288	0.7828495485244944	2.4894774820954657	-13.29672113091027	0.15613047739532215	0.8438695226046289	0.37440403631183544	0.06581615102224617	0.9341838489778368	0.12489904489496688
211	0.5640048693583828	0.7809610600988484	2.489444860067798	-13.296655886854936	0.15436539696158041	0.84563460303837	0.36605744042871086	0.06647852014309127	0.9335214798569924	0.1262640280550861
212	0.5687013073950588	0.7789277892396579	2.489409786666439	-13.296585740052219	0.15250836469697326	0.8474916353029761	0.3577617826354536	0.06719380075946615	0.9328061992406183	0.12774130723731794
213	0.5734973507760491	0.776747507419165	2.489386524110481	-13.296539214940303	0.15056306527897217	0.8494369347209754	0.3495216294861562	0.06796334522714825	0.9320366547729368	0.1293341827807322
214	0.5783950578076452	0.7744318122937603	2.4894977409375434	-13.29676164859443	0.14853691429710686	0.8514630857028412	0.3413393394374661	0.06878035230049519	0.9312196476995908	0.13104161771432313
215	0.5833933147299679	0.7719594977288111	2.4895926903747467	-13.296951547468833	0.14643307275820386	0.8535669272417458	0.3332261414673391	0.06965660783121232	0.9303433921688747	0.13287499843135608
216	0.5884904853462287	0.7693211654889645	2.489618033377501	-13.297002233474341	0.14425697162727139	0.8557430283726795	0.32519099930604395	0.07059747880251217	0.9294025211975762	0.13484158457204581
217	0.5936841452048062	0.7665160197172823	2.489588457237728	-13.296943081194797	0.14201579448178986	0.8579842055181621	0.31724116719477224	0.07160350636059412	0.9283964936394955	0.1369457607092225
218	0.5989709585178455	0.763543547782719	2.489519294228412	-13.296804755176167	0.13971672489923942	0.8602832751007135	0.30938389937471467	0.07267523165165768	0.9273247683484335	0.13919191141571663
219	0.6043466547009338	0.7604035299174403	2.4894259553204092	-13.296618077360161	0.1373669464571005	0.8626330535428532	0.30162645008706274	0.07381319582190222	0.9261868041781905	0.14158442126435838
220	0.6098060072302229	0.7570960485854314	2.48932333582579	-13.296412838370921	0.13497364273285345	0.865026357267101	0.29397607357300803	0.07501794001752714	0.9249820599825673	0.14412767482797795
221	0.6153428152226101	0.7536214975545052	2.4892251941174957	-13.296216554954334	0.13254399730397845	0.8674560026959768	0.28644002407374125	0.07629000538473193	0.9237099946153643	0.14682605667940585
222	0.620949888144877	0.7499805906430139	2.489143504766006	-13.296053176251355	0.13008519374795588	0.869914806252	0.27902555583045396	0.07762993306971601	0.9223700669303821	0.14968395139147223
223	0.6266190340554841	0.7461743701117644	2.489087787671674	-13.295941742062691	0.1276044156422662	0.8723955843576906	0.27173992308433764	0.07903826421867871	0.9209617357814215	0.1527057435370073
224	0.6323410517779804	0.7422042146708175	2.4890644150924404	-13.29589499690422	0.1251088465643895	0.8748911534355682	0.26459038007658314	0.08051553997781957	0.9194844600222827	0.15589581768884156
225	0.6381057273977357	0.738071847070028	2.489075898911099	-13.295917964541541	0.12260567009180623	0.8773943299081526	0.25758418104838193	0.08206230149333799	0.9179376985067664	0.1592585584198052
226	0.6439018354639555	0.7337793412413423	2.489120161098736	-13.296006488916817	0.12010206980199677	0.8798979301979633	0.25072858024092554	0.0836790899114333	0.9163209100886734	0.1627983503027284
227	0.649717145266647	0.7293291289600315	2.48918979115935	-13.296145749038045	0.11760522927244127	0.8823947707275204	0.2440308318954047	0.08536644637830505	0.914633553621804	0.16651957791044167
228	0.6555384325434153	0.7247240059911907	2.4892712954351532	-13.296308757589651	0.11512233208062013	0.8848776679193433	0.237498190253011	0.08712491204015263	0.9128750879599588	0.1704266258157752
229	0.6613514969536655	0.7199671376869587	2.4893443445624435	-13.29645485584423	0.11266056180401376	0.8873394381959518	0.23113790955493588	0.08895502804317537	0.9110449719569383	0.17452387859155913
230	0.6671411856379527	0.715062063999064	2.4893810271414605	-13.296528221002264	0.11022710202010232	0.8897728979798658	0.22495724404237016	0.09085733553357284	0.9091426644665433	0.17881572081062402
231	0.6729023111032124	0.7100248085962167	2.489485060859601	-13.296736288438545	0.10782358700355726	0.8921764129964133	0.21895370329258834	0.09282609487907943	0.9071739051210402	0.18329805411679975
232	0.67860819336466	0.7048519470158735	2.4895040905509633	-13.29677434782127	0.10546338984178011	0.8945366101581919	0.21314213047828715	0.0948649101253981	0.9051350898747248	0.1879814716091852
233	0.6842466244237225	0.699555129699417	2.4894591696381285	-13.296684505995598	0.10315102298142528	0.8968489770185472	0.20752481906878428	0.09697031878170996	0.903029681218416	0.19286533041558138
234	0.6898077444836506	0.6941483902224126	2.489391678585932	-13.296549523891207	0.10088957842111922	0.8991104215788533	0.20210185381677467	0.09913755709611212	0.9008624429040166	0.19794706152774905
235	0.6952815047093104	0.6886454438859915	2.4893313756501927	-13.29642891801973	0.09868214815948806	0.9013178518404845	0.19687331947495257	0.10136186131670193	0.8986381386834296	0.20322409593744947
236	0.7006576915572836	0.6830596469182291	2.4892964167304727	-13.296359000180288	0.09653182419515821	0.9034681758048146	0.19183930079601283	0.10363846769157652	0.8963615323085581	0.20869386463644352
237	0.7059259522220634	0.6774039585880016	2.4892934564978004	-13.296353079714944	0.0944416985267561	0.9055583014732175	0.1869998825326503	0.10596261246883298	0.894037387531305	0.21435379861649184
238	0.7110758211706376	0.6716909062252486	2.489317823934992	-13.296401814589327	0.0924148631529079	0.9075851368470674	0.18235514943755926	0.1083295318965687	0.8916704681035732	0.2202013288693559
239	0.7160967477335162	0.6659325531288994	2.4893537684425127	-13.296473703604367	0.09045441007224	0.9095455899277383	0.17790518626343463	0.11073446222288078	0.8892655377772658	0.22623388638679637
240	0.7209781247160286	0.6601404693314494	2.489374775550483	-13.29651571782031	0.0885634312833788	0.911436568716604	0.17365007776297114	0.11317263969586633	0.8868273603042858	0.23244890216057404
241	0.7257166807442226	0.6543297007682652	2.4894150782934963	-13.296596323306336	0.08674109436445841	0.9132589056355267	0.16958540604622777	0.1156375210888524	0.8843624789113049	0.2388394638775055
242	0.7302995443427448	0.648511825613087	2.4894205071912987	-13.296607181101939	0.08499230679926696	0.9150076932007191	0.16571199583227367	0.1181227534819345	0.8818772465182272	0.24540288358094595
243	0.7347228583823019	0.6427008084733288	2.489404061437768	-13.29657428959488	0.0833168640909477	0.9166831359090385	0.16202580211662587	0.12062114392042182	0.8793788560797435	0.2521321516108548
244	0.7389842003030085	0.636910052607969	2.4893813686380177	-13.29652890399538	0.08171397801131089	0.9182860219886751	0.15852218422844688	0.12312535501188847	0.8768746449882804	0.2590197196770953
245	0.7430815436973781	0.631151940598615	2.4893622355542115	-13.296490637827766	0.08018286033216698	0.919817139667819	0.1551965014968995	0.12562804936390834	0.8743719506362642	0.26605803948953
246	0.7470132496984989	0.6254378230127411	2.489351420971377	-13.296469008662093	0.07872272282532643	0.92127727717466	0.15204411325114658	0.12812188958405527	0.8718781104161214	0.27323956275802136
247	0.7507780578510254	0.6197780127188113	2.4893493972384	-13.296464961196143	0.07733277726259952	0.9226672227373882	0.1490603788203506	0.13059953827990342	0.8694004617202782	0.28055674119243273
248	0.7543750765088788	0.614181784477396	2.4893530949835023	-13.296472356686348	0.07601223541579666	0.9239877645841937	0.1462406575336744	0.13305365805902666	0.866946341941161	0.2880020265026266
249	0.7578037728021432	0.6086573794173031	2.489356626679169	-13.296479420077684	0.07476030905672831	0.9252396909432665	0.14358030872028077	0.13547691152899885	0.8645230884711964	0.2955678703984654
250	0.7610639622142612	0.603212013993413	2.4893519856492947	-13.29647013801793	0.07357620995720478	0.9264237900427967	0.1410746917093323	0.13786196129739414	0.8621380387028106	0.30324672458981256
251	0.7641567893496443	0.5978499883079783	2.489324798034084	-13.296415762787511	0.07245820789254809	0.9275417921074537	0.13871940173279054	0.14020403733421447	0.8597959626659945	0.3110320223290914
252	0.76708638646193	0.5925816595245625	2.489322067250339	-13.296410301220021	0.07140443246568606	0.9285955675343156	0.13650669988594838	0.14249098931491228	0.8575090106853006	0.31891145246704794
253	0.7698546476897965	0.5874097210262157	2.4893344898552527	-13.296435146429847	0.07041324377154436	0.9295867562284572	0.1344320250592011	0.14471710991556028	0.8552828900846569	0.32687844001156546
254	0.7724637145375898	0.5823358039822263	2.4893521937296645	-13.296470554178672	0.06948297833649071	0.9305170216635109	0.13249095901396987	0.14687706137052967	0.8531229386296918	0.33492668253393804
255	0.7749160346654522	0.5773608509571305	2.4893676918883196	-13.296501550495979	0.06861197268689288	0.931388027313109	0.13067908351167598	0.14896550591419172	0.851034494086034	0.3430498776054599
256	0.7772143457031819	0.5724851367253456	2.4893761667279746	-13.296518500175294	0.0677985633491185	0.9322014366508836	0.12899198031374037	0.15097710578091783	0.8490228942193121	0.35124172279742605
257	0.7793616591929128	0.5677082896931132	2.4893757190586987	-13.296517604836739	0.06704108684953533	0.9329589131504672	0.12742523118158433	0.15290652320507928	0.8470934767951545	0.3594959156811306
258	0.7813612447040207	0.5630293137011595	2.4893675825297583	-13.29650133177886	0.06633787971451109	0.933662120285492	0.12597441787662902	0.15474842042104725	0.8452515795791897	0.36780615382786763
259	0.783216614160993	0.5584466099886866	2.4893563044824836	-13.296478775684314	0.06568727847041345	0.9343127215295903	0.12463512216029547	0.15649745966319323	0.8435025403370463	0.3761661348089322
260	0.7849315064224034	0.5539579991077099	2.4893498947145325	-13.296465956148406	0.06508761964361014	0.9349123803563943	0.12340292579400494	0.15814830316588843	0.8418516968343528	0.38456955619561844
261	0.7864830037359771	0.5495501076697539	2.4890532602162354	-13.29587268715181	0.06454580151891692	0.9354541984810926	0.1222939808720118	0.15971659543849917	0.840283404561751	0.3930198820012822
262	0.7879122427920996	0.5452341760275908	2.4888995652648775	-13.295565297249098	0.06404806890180108	0.9359519310982117	0.1212759108395099	0.16116942883879284	0.8388305711614639	0.4014988010618842
263	0.7892203178968529	0.5410033667256735	2.4888654776274244	-13.29549712197419	0.06359370603264491	0.9364062939673697	0.12034703421308007	0.16250507996592767	0.8374949200343335	0.41000361898834625
264	0.7904071222591086	0.5368503116311563	2.4889169335606676	-13.295600033840682	0.06318241849173215	0.9368175815082831	0.1195066665963569	0.16372283459837442	0.8362771654018893	0.4185321194987304
265	0.7914726527902538	0.5327676496587515	2.4890240149022693	-13.295814196523882	0.0628139118593465	0.9371860881406683	0.11875412359297491	0.164821978514604	0.8351780214856609	0.42708208631109956
266	0.7924170083725635	0.5287480219008133	2.489160925414332	-13.296088017548005	0.06248789171577171	0.9375121082842419	0.11808872080656865	0.1658017974930872	0.8341982025071777	0.43565130314351563
267	0.793240388071284	0.5247840662524895	2.489305973214617	-13.296378113148581	0.06220406364129152	0.9377959363587206	0.11750977384077274	0.1666615773122948	0.8333384226879694	0.4442375537140406
268	0.7939430892934346	0.5208684115509988	2.4894415568935964	-13.29664928050654	0.06196213321618964	0.9380378667838207	0.11701659829922169	0.1674006037506977	0.8325993962495655	0.4528386217407374
269	0.7945255058962836	0.5169936712489108	2.489554153352011	-13.296874473423367	0.06176180602074981	0.9382381939792589	0.11660850978555008	0.16801816258676666	0.8319818374134955	0.46145229094166806
270	0.7949881262483993	0.5131524366421375	2.4896343058174804	-13.297034778354302	0.061602787635255764	0.9383972123647516	0.11628482390339248	0.1685135395989725	0.8314864604012892	0.47007634503489454
271	0.7953315312461169	0.5093372696741861	2.489676610913656	-13.297119388546655	0.06148478363999122	0.9385152163600154	0.11604485625638342	0.16888602056578608	0.8311139794344757	0.4787085677384797
272	0.7955563922882165	0.5055406953390716	2.489679704063433	-13.29712557484621	0.061407499615239926	0.9385925003847669	0.11588792244815749	0.16913489126567818	0.830865108734585	0.4873467427704855
273	0.7956634692115472	0.5017551937061363	2.489646242909749	-13.29705865253884	0.061370641141285605	0.9386293588587227	0.11581333808234923	0.16925943747711963	0.8307405625231464	0.49598865384897395
274	0.7956536081902799	0.49797319159089143	2.4895828888336817	-13.296931944386703	0.061373913798411985	0.938626086201599	0.11582041876259322	0.16925894497858127	0.8307410550216895	0.504632084692008
275	0.7955277396014243	0.494187053896865	2.489500287039709	-13.296766740798763	0.0614170231669028	0.9385829768331128	0.11590848009252401	0.16913269954853388	0.830867300451744	0.5132748190176495
276	0.795286875859183	0.49038907465431275	2.489413046062092	-13.296592258843525	0.06149967482704177	0.9385003251729802	0.11607683767577616	0.16887998696544831	0.8311200130348391	0.5219146405439606
277	0.7949321092206733	0.4865714677825401	2.4893397179246968	-13.296445602568735	0.06162157435911265	0.9383784256409181	0.11632480711598424	0.16850009300779537	0.8314999069925048	0.5305493329890041
278	0.7944643165007345	0.4827265972054947	2.489298947540963	-13.296364061801267	0.06178251031475809	0.9382174896852835	0.11665194037777302	0.16799264576572845	0.8320073542345873	0.5391762174367257
279	0.7938739612106255	0.47885416200212055	2.489178312044648	-13.296122790808639	0.06198531670689661	0.9380146832931453	0.11706613337695486	0.1673689057764456	0.8326310942238689	0.5477792381365318
280	0.7931718367115619	0.474935301664321	2.4891400723977926	-13.296046311514925	0.062227194825682765	0.9377728051743593	0.11755877739499028	0.16661532450941094	0.8333846754909019	0.5563782024464848
281	0.792354023703226	0.4709636123619193	2.489157436692098	-13.296081040103541	0.06250951694199411	0.9374904830580483	0.1181332332690399	0.16573567207234036	0.8342643279279703	0.5649684537071903
282	0.7914167136367182	0.4669329936746347	2.489207493004069	-13.296181152727481	0.06283365532670818	0.9371663446733344	0.11879286183626438	0.16473371857294983	0.8352662814273584	0.573545335259254
283	0.7903562188818096	0.4628376544280689	2.4892712553844882	-13.29630867748832	0.06320098225070254	0.9367990177493402	0.11954102393382436	0.16361323411895515	0.8363867658813501	0.5821041904432824
284	0.7891689831662165	0.45867211972105626	2.4893337031364586	-13.29643357299226	0.06361286998485473	0.9363871300151881	0.12038108039888047	0.16237798881807228	0.8376220111822298	0.5906403625998808
285	0.7878515922708976	0.4544312391012748	2.4893838101595565	-13.296533787038456	0.06407069080004234	0.9359293092000008	0.12131639206859343	0.16103175277801698	0.8389682472222818	0.5991491950696557
286	0.7864007849641239	0.45011019583727385	2.4894145615094674	-13.296595289738281	0.06457581696714289	0.9354241830329006	0.12235031978012384	0.15957829610650526	0.84042170389379	0.6076260311932128
287	0.7848134641557482	0.44570451722676163	2.489422954718691	-13.296612076156723	0.06512962075703391	0.9348703792430101	0.1234862243706323	0.15802138891125297	0.8419786110890387	0.6160662143111576
288	0.783086708251762	0.44121008587314337	2.4894099838414716	-13.29658613440229	0.065733474440593	0.9342665255594517	0.12472746667727956	0.15636480129997596	0.8436351987003121	0.6244650877640967
289	0.781217782687827	0.43662315185488454	2.489380604619554	-13.296527375958451	0.06638875028869771	0.9336112497113477	0.1260774075372262	0.15461230338039014	0.8453876966198944	0.6328179948926357
290	0.7792041516190357	0.4319403457053017	2.4893436796068693	-13.29645352593308	0.06709682057222555	0.9329031794278208	0.12753940778763287	0.15276766526021146	0.8472323347400696	0.6411202790373802
291	0.7770434897416751	0.42715869211386165	2.4893119025321706	-13.296389971783686	0.06785905756205413	0.9321409424379933	0.12911682826566026	0.15083465704715565	0.8491653429531223	0.6493672835389368
292	0.7747393522754111	0.42227527720986074	2.48934833331095	-13.296462833341241	0.06867358801752294	0.9313264119825257	0.13081098250005152	0.14881791975301342	0.851182080247261	0.6575558366771871
293	0.7722948524298949	0.4172896368729225	2.489502512178425	-13.296771191076193	0.06953825609733781	0.9304617439027116	0.13262439147839183	0.14672436016556908	0.8532756398347005	0.6656809411609426
294	0.7696827230168362	0.4122052878881179	2.489568525662105	-13.296903218043553	0.07046834252302121	0.929531657477029	0.13457119508374962	0.14455773516042908	0.8554422648398354	0.673728165102967
295	0.7669023748844352	0.4070244896766648	2.489563361579485	-13.296892889878315	0.07146427727899012	0.928535722721061	0.13665567139977317	0.14232519968170726	0.8576748003185521	0.681690363052952
296	0.7639534987533	0.40175040507501714	2.4895046900008744	-13.29677554672109	0.07252649034966148	0.9274735096503904	0.13888209851011077	0.1400339086735175	0.8599660913267367	0.6895603895605897
297	0.760836074021899	0.3963871236652971	2.489410286606697	-13.296586739932739	0.0736554117194524	0.9263445882806003	0.14125475449841093	0.1376910170799735	0.8623089829202757	0.6973310991755726
298	0.7575503772792129	0.3909396828869492	2.489297429896742	-13.296361026512827	0.07485147137277987	0.9251485286272737	0.143777917448322	0.13530367984518907	0.864696320155055	0.7049953464475922
299	0.7540969904993501	0.3854140865282563	2.489182273505226	-13.296130713729797	0.07611509929406085	0.9238849007059937	0.14645586544349218	0.13287905191327812	0.8671209480869608	0.7125459859263407
300	0.7504768088922888	0.37981732019593134	2.4890791949989284	-13.2959245567172	0.07744672546771243	0.9225532745323431	0.14929287656757007	0.13042428822835428	0.8695757117718795	0.7199758721615104
301	0.7466910483842898	0.3741573633630299	2.4890001227029686	-13.295766412125282	0.0788467798781516	0.921153220121905	0.1522932289042039	0.12794654373453146	0.8720534562656972	0.7272778597027932
302	0.7427412527009005	0.36844319759990757	2.4889538423466195	-13.29567385141258	0.08031569250979531	0.9196843074902624	0.155461200537042	0.1254529733759235	0.8745470266243	0.734444803099881
303	0.7386293000248496	0.36268481059989716	2.48894528568987	-13.295656738099083	0.08185389334706068	0.9181461066529982	0.1588010695497329	0.12295073209664406	0.8770492679035742	0.7414695569024662
304	0.7343574092004969	0.3568931956207838	2.4889748038248207	-13.295715774368984	0.08346181237436467	0.9165381876256956	0.16231711402592489	0.12044697484080702	0.879553025159406	0.7483449756602407
305	0.7299281454558663	0.35108034597501214	2.4890374285915877	-13.295841023902518	0.08513987957612425	0.9148601204239374	0.16601361204926615	0.11794885655252628	0.8820511434476817	0.7550639139228963
306	0.7253444256126467	0.3452592442158828	2.489122126555883	-13.29601041983111	0.08688852493675653	0.9131114750633066	0.16989484170340538	0.11546353217591543	0.8845364678242873	0.7616192262401255
307	0.7206095227539047	0.3394438456837746	2.4892110513141974	-13.296188269347736	0.08870817844067849	0.9112918215593863	0.17396508107199077	0.11299815665508839	0.8870018433451091	0.7680037671616202
308	0.7157270703185881	0.33364905609565965	2.48927880157001	-13.296323769859363	0.09059927007230706	0.9094007299277594	0.17822860823867057	0.11055988493415903	0.8894401150660333	0.7742103912370721
309	0.7107165483328467	0.327873901658072	2.4894879796753644	-13.29674212607007	0.09255495344733923	0.9074450465527288	0.1826777188040698	0.10814627933444663	0.8918537206657404	0.7802455877310318
310	0.7055999952276573	0.3221151002413598	2.4900235393224204	-13.297813245364182	0.09456624103549359	0.905433758964575	0.18730330359476716	0.10575464318129596	0.8942453568188855	0.7861184856067656
311	0.7003370916310203	0.31644219072048535	2.4902438581174	-13.298253882954139	0.09665384940774509	0.9033461505923246	0.19214547583141886	0.10342254575075203	0.8965774542494241	0.7917808824169121
312	0.6949463587645031	0.3108622951690745	2.4902365138018494	-13.298239194323042	0.0988113061418568	0.9011886938582144	0.1971986788848411	0.10115087597855846	0.8988491240216128	0.7972356098324752
313	0.6894458229822269	0.3053823973863286	2.49007729124001	-13.297920749199363	0.10103213881559166	0.8989678611844815	0.2024573561258497	0.09894052280045904	0.9010594771997074	0.8024854995244578
314	0.6838529534288866	0.3000093325984684	2.489830331353807	-13.297426829426957	0.10330987500671251	0.8966901249933629	0.20791595092526033	0.09679237515219757	0.9032076248479644	0.807533383163863
315	0.6781846055004139	0.29474977743006947	2.4895484051754773	-13.296862977070298	0.10563804229298253	0.8943619577070954	0.2135689066538893	0.0947073219695177	0.90529267803064	0.8123820924216946
316	0.6724569700443401	0.2896102401588819	2.48927328836238	-13.296312743444105	0.10801016825216457	0.891989831747916	0.21941066668255238	0.0926862521881632	0.9073137478119905	0.8170344589689553
317	0.6666855282089734	0.28459705126738344	2.489036215252515	-13.295838597224373	0.11041978046202153	0.8895802195380619	0.22543567438206524	0.0907300547438779	0.909269945256272	0.8214933144766485
318	0.6608850118241467	0.2797163543039566	2.4888583952121826	-13.295482957143708	0.11286040650031652	0.8871395934997697	0.23163837312324426	0.0888396185724054	0.911160381427741	0.8257614906157776
319	0.6550693691714986	0.2749740970662091	2.4887515774803894	-13.29526932168012	0.11532557394481247	0.8846744260552766	0.23801320627690514	0.0870158326094895	0.9129841673906536	0.8298418190573458
320	0.6492517359790025	0.270376023118561	2.4887186538424713	-13.295203474404286	0.1178088103732723	0.8821911896268195	0.2445546172138638	0.08525958579087395	0.914740414209266	0.8337371314723563
321	0.6434444114527962	0.2659276636558271	2.4887542912042226	-13.295274749127788	0.12030364336345882	0.8796963566366356	0.25125704930493564	0.08357176705230263	0.9164282329478345	0.8374502595318122
322	0.6376588391392528	0.26163432972409384	2.4888455884547893	-13.295457343628922	0.12280360049313538	0.8771963995069614	0.25811494592093764	0.08195326532951899	0.9180467346706154	0.840984034906717
323	0.6319055923916983	0.2575011048097672	2.4889727538918853	-13.295711674503115	0.12530220934006472	0.8746977906600341	0.26512275043268513	0.08040496955826695	0.9195950304418649	0.8443412892680741
324	0.6261943641991887	0.2535328378072075	2.489109800941751	-13.295985768602845	0.12779299748200984	0.8722070025180906	0.27227490621099415	0.07892776867429022	0.9210722313258393	0.8475248542868863
325	0.6205339611193622	0.2497341363749105	2.4892252609547176	-13.296216688628778	0.1302694924967337	0.869730507503368	0.2795658566266805	0.07752255161333255	0.9224774483867948	0.8505375616341572
326	0.6149323010435168	0.24610936068971334	2.489282912517588	-13.296331991754517	0.13272522196199926	0.8672747780381033	0.28699004505056014	0.07619020731113768	0.9238097926889876	0.8533822429808898
327	0.6093946125118292	0.2426593170487663	2.4892573800304074	-13.296280926780156	0.13515622433685862	0.8648437756632468	0.2945424712790145	0.07492921599622668	0.9250707840038954	0.8560622614156245
328	0.6039384282907038	0.23937663073951942	2.4892511996640616	-13.296268566047466	0.1375471186614129	0.8624528813386947	0.30220603297727816	0.07373610400859905	0.9262638959915207	0.858588422393978
329	0.5985692963395327	0.23625981774055038	2.489261142243749	-13.29628845120684	0.13989137533279616	0.8601086246673132	0.3099733032386619	0.07260920449128166	0.9273907955088364	0.8609657375508677
330	0.5932911570391491	0.23330726454098127	2.4892788422887957	-13.296323851296933	0.1421831709068471	0.8578168290932637	0.3178375064273469	0.07154683653503151	0.9284531634650853	0.863198868675117
331	0.5881071542471124	0.23051701059051044	2.489297237987352	-13.296360642694047	0.14441668193940435	0.8555833180607082	0.32579186690751416	0.07054731923060552	0.9294526807695103	0.8652924775555491
332	0.5830196547689784	0.2278867652678026	2.4893109698293854	-13.296388106378116	0.14658608498630657	0.853413915013808	0.33382960904334474	0.06960897166876066	0.9303910283313538	0.8672512259809876
333	0.5780302693259634	0.22541392479942501	2.489316740628923	-13.29639964797719	0.14868555660339228	0.8513144433967252	0.3419439571990191	0.06873011294025398	0.9312698870598587	0.8690797757402557
334	0.5731398747390262	0.2230955890781371	2.489313636977001	-13.296393440673347	0.15070927334650042	0.849290726653621	0.3501281357387195	0.06790906213584229	0.9320909378642679	0.8707827886221772
335	0.5683486370544135	0.22092857833234736	2.489303412566538	-13.296372991852417	0.1526514117714695	0.8473485882286574	0.3583753690266264	0.06714413834628262	0.9328558616538238	0.8723649264155753
336	0.5636560353422302	0.21890944960145453	2.4892907342656576	-13.296347635250662	0.15450614843413815	0.8454938515659959	0.3666788814269209	0.06643366066233194	0.9335663393377694	0.8738308509092733
337	0.5590608859077059	0.21703451297462295	2.489283392281954	-13.296332951283254	0.15626765989034508	0.8437323401097983	0.375031897303784	0.06577594817474722	0.9342240518253473	0.8751852238920947
338	0.5545471895702471	0.21533311518205234	2.488907430594451	-13.295581027908243	0.15795710222030865	0.8420428977798452	0.38343954505905636	0.06517992037095556	0.9348200796291376	0.8764070724839079
339	0.5501321307386786	0.2137554244968134	2.4887005314208794	-13.295167229561098	0.15953339498426597	0.8404666050158952	0.3918797274145489	0.06462893360383881	0.9353710663962533	0.8775358058000197
340	0.5458091577128418	0.21230026418582149	2.488637479273776	-13.295041125266899	0.1609946069787826	0.839005393021383	0.4003495874842406	0.06412219735492472	0.9358778026451665	0.8785732871348075
341	0.5415710855324201	0.21096775813895585	2.488680924050044	-13.29512801481943	0.16233993691830675	0.8376600630818608	0.40884678742858555	0.06365937677756872	0.9363406232225219	0.8795202950317469
342	0.5374107266496864	0.20975792079029254	2.4887976773002913	-13.29536152131993	0.1635685835172867	0.8364314164828808	0.41736898940803857	0.06324013702512614	0.9367598629749639	0.8803776080343135
343	0.533320887433357	0.20867065911024385	2.4889586853319052	-13.295683537383155	0.16467974549017075	0.8353202545099951	0.4259138555830544	0.06286414325095237	0.9371358567491374	0.8811460046859828
344	0.5292943641179482	0.20770577465729567	2.4891390098225177	-13.296044186364377	0.1656726215514072	0.834327378448756	0.4344790481140878	0.06253106060840274	0.9374689393916866	0.8818262635302303
345	0.5253239382161611	0.20686296568575469	2.489317813210943	-13.296401793141229	0.16654641041544424	0.8334535895847158	0.4430622291615929	0.062240554250832685	0.9377594457492564	0.8824191631105317
346	0.5214023714127731	0.20614182930598923	2.4894783465812687	-13.296722859881879	0.16730031079673036	0.8326996892034264	0.45166106088602564	0.061992289331597485	0.9380077106684914	0.8829254819703625
347	0.5175223999594806	0.20554186369371708	2.4896079381889926	-13.29698204309733	0.1679335214097137	0.83206647859044	0.46027320544784023	0.061785931004052545	0.9382140689960362	0.8833459986531982
348	0.5136767285911026	0.20506247034496805	2.489697981200808	-13.29716212912096	0.16844524096884264	0.8315547590313088	0.4688963250074914	0.061621144421553226	0.9383788555785353	0.8836814917025144
349	0.5098580239845518	0.2047029563734183	2.4897439196344147	-13.297254005988172	0.1688346681885654	0.8311653318115851	0.47752808172543393	0.061497594737454885	0.9385024052626334	0.8839327396617866
350	0.5060589077829611	0.20446253684686644	2.4897452318932807	-13.297256630505906	0.16910100178333032	0.830898998216821	0.48616613776212253	0.061414947105112895	0.9385850528949752	0.8841005210744906
351	0.5022719492083642	0.20434033715968736	2.4897054116936346	-13.297176990106612	0.16924344046758566	0.8307565595325687	0.4948081552780114	0.06137286667788261	0.938627133322205	0.8841856144841016
352	0.49848965728734007	0.20433539543817392	2.4896319465770036	-13.29703005987335	0.16926118295577974	0.8307388170443802	0.5034517964335564	0.0613710186091194	0.9386289813909678	0.8841887984340955
353	0.49470447271505913	0.20444666497574038	2.489536294590736	-13.296838755900811	0.16915342796236083	0.8308465720378079	0.5120947233892119	0.061409068052178634	0.9385909319479081	0.8841108514679475
354	0.49090875938419465	0.2046730166950338	2.489433860100992	-13.29663388692133	0.16891937420177724	0.8310806257984038	0.5207345983054325	0.06148668016041567	0.9385133198396703	0.8839525521291335
355	0.48709479560621627	0.20501324163406387	2.489343970077744	-13.296454106874831	0.16855822038847726	0.8314417796117202	0.5293690833426729	0.06160352008718587	0.9383964799128992	0.8837146789611289
356	0.4832547650536315	0.20546605345353242	2.4892898525607032	-13.29634587184075	0.16806916523690918	0.8319308347633092	0.5379958406613878	0.0617592529858446	0.9382407470142394	0.8833980105074093
357	0.4793878603673529	0.2060406498585322	2.4891626196518315	-13.296091406023006	0.16746335009671656	0.8325366499035108	0.5465997997091377	0.06195652733551934	0.9380434726645644	0.8829947852599769
358	0.4754798385710947	0.20673190784104256	2.4890508549172976	-13.29586787655394	0.16673337409314187	0.8332666259070842	0.5551924514829968	0.062194234163006665	0.9378057658370775	0.882509185654831
359	0.47151829797867867	0.20753610918056764	2.4890274527053595	-13.29582107213006	0.16587399293033256	0.834126007069892	0.5637801278786551	0.06247162043082138	0.9375283795692632	0.8819441001239032
360	0.46749719995549543	0.20845745548428574	2.489064301848244	-13.295894770415831	0.16488944808542452	0.8351105519147983	0.5723576708382688	0.06279015434096033	0.9372098456591246	0.8812958528984107
361	0.46341085582273955	0.20950002886262709	2.489137152567074	-13.296040471853491	0.1637839810355538	0.8362160189646671	0.5809199223039943	0.06315130409542037	0.9368486959046649	0.8805607682095713
362	0.4592539361516058	0.21066778078903692	2.489225649782334	-13.296217466284013	0.16256183325785648	0.8374381667423624	0.5894617242179868	0.06355653789619832	0.9364434621038873	0.8797351702886025
363	0.45502148124851716	0.2119645206406663	2.4893133575247797	-13.2963928817689	0.16122724622946835	0.8387727537707482	0.597977918522404	0.06400732394529109	0.9359926760547951	0.8788153833667217
364	0.45070891276424374	0.213393903938365	2.489387770884318	-13.296541708487982	0.15978446142752548	0.8402155385726887	0.6064633471594014	0.06450513044469551	0.9354948695553914	0.8777977316751464
365	0.4463120463491431	0.2149594203058438	2.489440312319534	-13.296646791358413	0.15823772032916383	0.8417622796710478	0.6149128520711352	0.06505142559640843	0.9349485744036793	0.8766785394450943
366	0.44182710526677893	0.2166643811694392	2.489466309560222	-13.296698785839787	0.15659126441151947	0.8434087355886893	0.6233212751997617	0.0656476776024267	0.9343523223976622	0.8754541309077829
367	0.43725073486880206	0.2185119072215148	2.4894649527663306	-13.296696072252008	0.1548493351517283	0.8451506648484776	0.6316834584874367	0.06629535466474716	0.933704645335343	0.8741208302944298
368	0.4325800178252376	0.22050491567220087	2.4894392290519374	-13.296644624823216	0.15301617402692647	0.8469838259732764	0.6399942438763162	0.06699592498536665	0.9330040750147252	0.8726749618362524
369	0.42781248999620597	0.22264610731588952	2.489395832933938	-13.296557832587219	0.1510960225142497	0.8489039774859498	0.6482484733085574	0.06775085676628208	0.9322491432338117	0.8711128497644682
370	0.4229461568236117	0.22493795344066858	2.489345051711731	-13.296456270142805	0.14909312209083414	0.8509068779093619	0.6564409887263158	0.06856161820949026	0.9314383817906059	0.8694308183102949
371	0.41797951011445805	0.22738268261070416	2.4893006252147654	-13.296367417148875	0.1470117142338157	0.8529882857663768	0.6645666320717478	0.06942967751698807	0.9305703224831108	0.8676251917049499
372	0.4129115139235878	0.2299821427759825	2.489280718471064	-13.29632760366147	0.14485603281345666	0.855143967186732	0.672620299650566	0.07035643584906971	0.9296435641510323	0.8656923487727773
373	0.4077384709564592	0.2327189080528398	2.4894713034072646	-13.296708773533872	0.14263098966960933	0.8573690103305759	0.6806037974099358	0.0713325008064804	0.9286674991936233	0.8636362168977664
374	0.40247317516945486	0.23562999386019035	2.4895510273017054	-13.29686822132275	0.1403467846341766	0.859653215366005	0.688493422126839	0.07237767357034561	0.9276223264297598	0.8614360321911697
375	0.3971194539852217	0.23871468926728034	2.489545362165586	-13.296856891050517	0.1380104839275024	0.8619895160726756	0.6962823657444442	0.07349203781975917	0.926507962180348	0.8590878553131676
376	0.39168206511929765	0.24197199443309347	2.4894792289897802	-13.296724624698903	0.135629153769931	0.8643708462302433	0.703963820205919	0.07467567723381476	0.9253243227662944	0.8565877469239407
377	0.3861667142749325	0.24540061524980494	2.4893763297159976	-13.296518826151342	0.1332098603818066	0.8667901396183639	0.7115309774544307	0.07592867549160605	0.924071324508505	0.8539317676836697
378	0.3805800700150464	0.24899895839031083	2.4892584630527006	-13.296283092824746	0.1307596699834734	0.8692403300166933	0.7189770294331472	0.07725111627222676	0.9227488837278864	0.8511159782525352
379	0.3749297754240961	0.25276512677768104	2.489144825817192	-13.29605581835373	0.12828564879527557	0.8717143512048874	0.7262951680852363	0.0786430832547706	0.9213569167453448	0.8481364392907177
380	0.369224456177222	0.2566969154944896	2.4890513015081286	-13.295868769735604	0.12579486303755746	0.8742051369626016	0.733478585353865	0.08010466011833114	0.9198953398817865	0.8449892114583981
381	0.3634737246409285	0.2607918081500735	2.488989737963931	-13.295745642647208	0.12329437893066292	0.8767056210694925	0.7405204731822022	0.08163593054200236	0.9183640694581178	0.8416703554157565
382	0.35768817963873833	0.26504697372388386	2.488967216287449	-13.29570059929424	0.12079126269493627	0.8792087373052153	0.7474140235134148	0.0832369782048778	0.9167630217952449	0.8381759318229737
383	0.35187940152669106	0.26945926390319597	2.4889853137626234	-13.29573679424459	0.11829258055072171	0.8817074194494262	0.7541524282906709	0.08490788678605118	0.9150921132140742	0.8345020013402302
384	0.34605994223731895	0.27402521093355114	2.48903936430274	-13.295844895324823	0.11580539871836343	0.884194601281781	0.760728879457138	0.08664873996461624	0.913351260035512	0.8306446246277067
385	0.3402433099667439	0.27874102600040584	2.489117721099909	-13.296001608919163	0.11333678341820558	0.8866632165819353	0.7671365689559838	0.08845962141966665	0.9115403785804645	0.8265998623455838
386	0.3344439481978502	0.28360259816057454	2.489201027636895	-13.296168221993135	0.11089380087059254	0.889106199129545	0.7733686887303757	0.09034061483029601	0.9096593851698384	0.8223637751540422
387	0.3286772087730809	0.2886054938421566	2.489261505114789	-13.296289176948921	0.10848351729586814	0.8915164827042662	0.779418430723482	0.09229180387559827	0.9077081961245395	0.8179324237132622
388	0.32293532684052906	0.29372354042189863	2.4895379864597595	-13.296842139638862	0.10609946195370352	0.8939005380464256	0.7852980364861706	0.09430314492481812	0.905696855075322	0.8133187572270519
389	0.3172386557727173	0.2989551092638565	2.4899421783616615	-13.297650523442663	0.10375207630820589	0.8962479236919163	0.7909982339043911	0.09637519735236287	0.903624802647779	0.8085157627043553
390	0.31163591353390047	0.3043196344113329	2.490079549788085	-13.297925266295515	0.10146635114427544	0.8985336488558413	0.7964886832924939	0.09851904422655525	0.9014809557735891	0.8034990674807001
391	0.30613402932836364	0.3097987198238811	2.4900300784640432	-13.297826323647428	0.0992430514590688	0.9007569485410439	0.8017723677393062	0.10072811660990731	0.8992718833902404	0.7982744046962462
392	0.30073976414648473	0.31537452477474587	2.4898620428561005	-13.297490252431542	0.09708294224974275	0.902917057750367	0.8068522703336548	0.102995845564931	0.8970041544352209	0.7928475074911538
393	0.29545970146412814	0.32102982295838517	2.4896322787396494	-13.297030724198642	0.09498678851345362	0.9050132114866541	0.811731374164368	0.10531566215413869	0.8946843378460178	0.7872241090055823
394	0.29030023828116847	0.3267480556455657	2.489386544377818	-13.29653925547498	0.09295535524735819	0.9070446447527483	0.8164126623202725	0.10768099744004232	0.8923190025601191	0.7814099423796916
395	0.2852675765093864	0.3325133789757686	2.4891599717460764	-13.296086110211496	0.09098940744861309	0.9090105925514925	0.8208991178901957	0.11008528248515398	0.8899147175150128	0.7754107407536418
396	0.280367714719609	0.33831070550441034	2.48897758498841	-13.295721336696165	0.08908971011437497	0.9109102898857302	0.8251937239629648	0.11252194835198573	0.8874780516481865	0.7692322372675928
397	0.27560644025755043	0.3441257401485101	2.488854870855291	-13.295475908429925	0.08725702824180043	0.9127429717583044	0.829299463627407	0.11498442610304967	0.885015573897128	0.7628801650617044
398	0.2709893217374012	0.34994501069888967	2.48879838912954	-13.295362944978425	0.08549212682804623	0.9145078731720582	0.8332193199723495	0.11746614680085771	0.8825338531993254	0.756360257276137
399	0.2665217019217845	0.3557558930897884	2.488806413919412	-13.295378994558167	0.08379577087026877	0.9162042291298348	0.83695627608662	0.11996054150792225	0.8800394584922661	0.7496782470510497
400	0.26220869099626665	0.3615466316379009	2.4888695991494565	-13.295505365018258	0.08216872536562478	0.9178312746344776	0.8405133150590456	0.12246104128675524	0.8775389587134379	0.7428398675266026
401	0.25805516024615216	0.36730635448232485	2.4889716635958727	-13.29570949391109	0.0806117553112709	0.9193882446888295	0.8438934199784535	0.12496107719986874	0.8750389228003288	0.7358508518429557
402	0.2540657361428358	0.3730250844747043	2.4890900923986345	-13.295946351516612	0.07912562570436377	0.9208743742957337	0.847099573933671	0.12745408030977481	0.8725459196904264	0.728716933140269
403	0.25024479484651474	0.3786937457850014	2.489196853154538	-13.296159873028415	0.07771110154206	0.9222888984580335	0.8501347600135254	0.12993348167898558	0.8700665183212186	0.7214438445587023
404	0.2465964571315744	0.38430416650281246	2.4892591254780463	-13.296284417675436	0.07636894782151633	0.923631052178572	0.8530019613068437	0.13239271237001293	0.8676072876301933	0.714037319238416
405	0.24312333369939898	0.3898522272297157	2.4892321321408977	-13.296230431001137	0.07509850753723293	0.9249014924628514	0.8557035110245683	0.1348286224983111	0.8651713775018984	0.7065010523131979
406	0.2398181313160378	0.3953205860901371	2.489216707230299	-13.296199581179941	0.07389621110995558	0.9261037888901266	0.8582500381833678	0.13722622035239948	0.8627737796478141	0.6988517930572569
407	0.2366787099699007	0.4007018100818266	2.4892244248806152	-13.296215016480573	0.0727603216178531	0.9272396783822279	0.860647415121396	0.13957737079371896	0.8604226292064989	0.6910984831035336
408	0.2337035738931187	0.4059920688749992	2.4892451086789062	-13.296256384077157	0.07168916795062391	0.9283108320494564	0.8629002194096758	0.14187640622295522	0.8581235937772671	0.6832477436176984
409	0.23089088007558656	0.4111883100563008	2.489269923684959	-13.29630601408926	0.07068107899796637	0.9293189210021136	0.8650130286192301	0.144117659040794	0.8558823409594328	0.6753061957654212
410	0.22823845498584516	0.41628824021707955	2.4892917691496947	-13.296349705018732	0.06973438364957896	0.9302656163505004	0.866990420321082	0.14629546164792087	0.8537045383523107	0.6672804607123729
411	0.22574381125897258	0.42129030462630285	2.489305633682534	-13.296377434084413	0.06884741079515995	0.9311525892049186	0.8688369720862545	0.14840414644502187	0.8515958535552145	0.6591771596242223
412	0.2234041643005783	0.42619366575482653	2.489308912788575	-13.29638399229649	0.06801848932440778	0.9319815106756693	0.8705572614857705	0.15043804583278253	0.8495619541674586	0.6510029136666403
413	0.22121644875893154	0.43099818091313136	2.489301689065491	-13.296369544850325	0.06724594812702087	0.9327540518730536	0.8721558660906528	0.15239149221188864	0.8476085077883573	0.642764344005297
414	0.2191773348201289	0.43570437925858446	2.489286975759767	-13.296340118238877	0.06652811609269758	0.9334718839073731	0.8736373634719244	0.15425881798302582	0.8457411820172249	0.6344680718058626
415	0.21728324428398538	0.4403134384208286	2.4892709248265756	-13.296308016372492	0.06586332211113638	0.9341366778889288	0.8750063312006083	0.15603435554687975	0.8439656444533757	0.6261207182340076
416	0.21553234089099838	0.4448279285166769	2.489240408130594	-13.29624698298053	0.06525053315140514	0.9347494668486529	0.876265839651923	0.15771398594617594	0.8422860140540845	0.617728331976095
417	0.213950915512377	0.44926142136030367	2.488860243896828	-13.295486654512999	0.0646977129694912	0.9353022870305655	0.8773971993859832	0.15931636904593516	0.8406836309543361	0.6092888286317758
418	0.21248909738414556	0.4536003104645254	2.488663074084913	-13.295092314889171	0.06418822131488494	0.9358117786851708	0.878439447067847	0.16080147099100506	0.8391985290092737	0.6008201090704041
419	0.21114728669620453	0.4578520568611588	2.488607701485421	-13.294981569690187	0.06372181920698466	0.9362781807930703	0.8793931391909345	0.1621687188500742	0.8378312811502094	0.5923244382442321
420	0.2099257814639649	0.4620240959756855	2.488657093698123	-13.295080354115592	0.06329826766518867	0.9367017323348659	0.8802588322486654	0.1634175396918312	0.8365824603084548	0.5838040811055124
421	0.20882477874663263	0.4661238420793127	2.488778344806355	-13.295322856332053	0.0629173277088953	0.937082672291159	0.8810370827344596	0.16454736058496452	0.8354526394153221	0.5752613026064981
422	0.20784437592670968	0.47015869322958714	2.4889426485545156	-13.295651463828374	0.0625787603575028	0.9374212396425514	0.8817284471417369	0.16555760859816296	0.8344423914021227	0.5666983676994403
423	0.20698457204826237	0.47413603667881715	2.4891252798120433	-13.296016726343431	0.0622823266304095	0.9377176733696447	0.8823334819639171	0.16644771080011495	0.8335522892001687	0.558117541336592
424	0.20624526921154462	0.47806325472889166	2.4893055815715037	-13.296377329862349	0.062027787547013706	0.9379722124530406	0.8828527436944202	0.16721709425950912	0.8327829057407719	0.5495210884702056
425	0.20562627402159972	0.4819477310103948	2.4894669551693944	-13.296700077058132	0.06181490412671373	0.9381850958733408	0.883286788826666	0.16786518604503403	0.832134813955244	0.5409112740525337
426	0.20512729908850103	0.4857968571632358	2.4895968518434133	-13.29695987040617	0.06164343738890787	0.9383565626111469	0.8836361738540743	0.1683914132253783	0.831608586774897	0.5322903630358286
427	0.20474796457692523	0.4896180398953205	2.489686764154582	-13.297139695028505	0.061513148352994436	0.9384868516470604	0.8839014552700649	0.16879520286923042	0.8312047971310428	0.5236606203723433
428	0.20448779980279197	0.49341870839509894	2.4897322162101787	-13.2972305991397	0.061423798038371724	0.9385762019616831	0.8840831895680578	0.16907598204527907	0.8309240179549932	0.515024311014329
429	0.20434624487473552	0.49720632207311527	2.489732752025433	-13.29723167077021	0.06137514746443805	0.9386248525356168	0.8841819332414727	0.1692331778222128	0.8307668221780599	0.5063836999140389
430	0.204322652378211	0.5009883786069935	2.4896919217593814	-13.297150010238106	0.06136695765059171	0.9386330423494629	0.8841982427837295	0.16926621726872018	0.8307337827315547	0.4977410520237252
431	0.20441628910007248	0.5047724222635703	2.48961726595289	-13.297000698625123	0.061398989616231026	0.9386010103838233	0.8841326746882481	0.16917452745348982	0.8308254725467898	0.48909863229564055
432	0.20462633779149408	0.508566052471177	2.489520298284683	-13.296806763288707	0.061471004380754285	0.9385289956192994	0.8839857854484483	0.16895753544521025	0.8310424645550767	0.48045870568203713
433	0.20495189896714372	0.5123769326143518	2.489416487743968	-13.29659914220728	0.061582762963559794	0.9384172370364929	0.88375813155775	0.16861466831257013	0.8313853316877274	0.4718235371351681
434	0.2053919927385469	0.5162127990225379	2.489325241496352	-13.296416649712047	0.06173402638404587	0.9382659736160057	0.883450269509573	0.16814535312425796	0.8318546468760537	0.46319539160728473
435	0.20594556067961978	0.5200814701235902	2.4892698900945858	-13.296305946908515	0.061924555661610814	0.9380754443384393	0.8830627557973372	0.16754901694896235	0.8324509830513676	0.45457653405063997
436	0.2066212025677765	0.5239835879551219	2.489149617798941	-13.296065402317224	0.06215678069562433	0.937843219304425	0.8825881161960333	0.166836676362799	0.8331633236375371	0.4459818394864292
437	0.20741514432220587	0.5279329041879399	2.4890413429161766	-13.295848852551696	0.06243009082282475	0.9375699091772247	0.8820295476372086	0.16600181065722142	0.8339981893431108	0.43740093081915926
438	0.20832399960342463	0.5319419931373831	2.489018567419415	-13.295803301558173	0.06274392477679408	0.9372560752232555	0.881389735246372	0.16503910384306875	0.8349608961572602	0.4288272410645368
439	0.20935208598059474	0.5360165584397139	2.4890538334900922	-13.295873833699526	0.06309980347923437	0.9369001965208155	0.8806648169885247	0.1639530770246309	0.8360469229756955	0.42026621625563804
440	0.21050359225860338	0.5401619221191244	2.4891235427393417	-13.296013252198026	0.06349924785184773	0.9365007521482024	0.8798509308286682	0.16274825130619758	0.8372517486941264	0.4117233024255373
441	0.21178256666751427	0.54438301280145	2.489207976775238	-13.296182120269815	0.06394377881633621	0.9360562211837143	0.8789442147318041	0.1614291477920587	0.8385708522082631	0.40320394560731077
442	0.21319290471160435	0.5486843527772791	2.4892913063568427	-13.296348779433028	0.0644349172944019	0.9355650827056491	0.8779408066629337	0.16000028758650403	0.8399997124138154	0.39471359183403415
443	0.21473833669834985	0.5530700440015703	2.489361585517705	-13.296489337754752	0.06497418420774685	0.9350258157923046	0.8768368445870587	0.15846619179382343	0.8415338082064933	0.38625768713878295
444	0.21642241496940118	0.5575437531284196	2.4894107274446267	-13.296587621608595	0.06556310047807318	0.934436899521979	0.8756284664691805	0.15683138151830678	0.8431686184820065	0.3778416775546328
445	0.2182485008573073	0.5621086956903956	2.489434459324362	-13.296635085368067	0.06620318702708286	0.9337968129729699	0.8743118102743006	0.15510037786424397	0.8448996221360651	0.3694710091146599
446	0.2202197513935421	0.5667676195418985	2.489432253816017	-13.29663067435138	0.0668959647764781	0.9331040352235754	0.8728830139674204	0.1532777019359246	0.8467222980643792	0.3611511278519387
447	0.22233910579522898	0.5715227876952711	2.4894072352625605	-13.296580637244464	0.06764295464796091	0.9323570453520935	0.8713382155135414	0.15136787483763864	0.8486321251626586	0.35288747979954527
448	0.22460927175987178	0.5763759606869351	2.489366059211359	-13.296498285142059	0.06844567756323337	0.931554322436822	0.8696735528776652	0.1493754176736759	0.8506245823266132	0.34468551099055533
449	0.22703271159936467	0.5813283786186071	2.4893187642598713	-13.296403695239086	0.06930565444399756	0.9306943455560589	0.8678851640247931	0.14730485154832623	0.852695148451953	0.33655066745804435
450	0.22961162824658032	0.5863807430256869	2.4892785956668275	-13.296323358052996	0.07022440621195554	0.929775593788102	0.8659691869199267	0.14516069756587946	0.854839302434388	0.3284883952350881
451	0.2323458162605767	0.5915338876461875	2.489281999949979	-13.296330166619299	0.07120232797722234	0.9287976720228365	0.8639227513550827	0.1429471935548084	0.8570528064454457	0.320503074214202
452	0.23522072964793383	0.5967909848862296	2.4894917984323444	-13.296749763584032	0.07223179328795132	0.9277682067121086	0.86174870371148	0.14066860915122015	0.8593313908490298	0.31259352115626393
453	0.23827320946399533	0.60213574824065	2.4895749683721906	-13.296916103463722	0.07333228765490658	0.9266677123451543	0.8594252882239236	0.13833773748403944	0.8616622625162059	0.30478580517953124
454	0.24150173553375265	0.6075636668139737	2.489562160691741	-13.296890488102823	0.07450365027505591	0.925496349725006	0.856948830128414	0.1359615305220935	0.8640384694781469	0.2970864505269951
455	0.24490450070336856	0.6130693011658173	2.4894827990921478	-13.296731764903637	0.07574572034536707	0.924254279654696	0.8543156546609519	0.13354694023420954	0.8664530597660257	0.28950198144164685
456	0.24847940805065527	0.618646269005126	2.489364371767828	-13.296494910255	0.07705833706280782	0.9229416629372564	0.851522087057538	0.13110091858921483	0.8688990814110151	0.2820389221664776
457	0.2522240685390328	0.6242872339004413	2.4892317146902956	-13.296229596099934	0.07844133962434584	0.9215586603757197	0.848564452554173	0.12863041755593668	0.8713695824442877	0.2747037969444791
458	0.2561357991265568	0.6299838973750278	2.4891062881137564	-13.295978742946858	0.0798945672269491	0.9201054327731177	0.8454390763868573	0.126142389103202	0.873857610897017	0.2675031300186416
459	0.2602116213414235	0.6357269947489201	2.4890054479171235	-13.29577706255359	0.08141785906758524	0.9185821409324829	0.8421422837915916	0.12364378519983818	0.8763562148003754	0.2604434456319568
460	0.2644482603351893	0.6415062950810895	2.488941713539824	-13.295649593798991	0.08301105434322206	0.9169889456568475	0.8386704000043766	0.12114155781467244	0.8788584421855358	0.253531268027416
461	0.2688421444247634	0.6473106055539226	2.4889220346377963	-13.295610235994936	0.0846739922508273	0.9153260077492438	0.835019750261213	0.11864265891653197	0.8813573410836711	0.24677312144801034
462	0.2733894051340523	0.6531277806290956	2.488947059227125	-13.29566028517359	0.08640651198736864	0.9135934880127041	0.8311866597981016	0.11615404047424419	0.883845959525954	0.24017553013673154
463	0.27808587774596993	0.6589447362886998	2.48901040704137	-13.295786980802085	0.08820845274981406	0.9117915472502603	0.8271674538510425	0.11368265445663595	0.8863173455435578	0.23374501833656988
464	0.2829271023753378	0.6647474696581077	2.489097953147283	-13.29596207301391	0.09007965373513122	0.909920346264945	0.8229584576560367	0.11123545283253464	0.8887645471676551	0.22748811029051708
465	0.287908325573046	0.6705210842876198	2.4891871285801566	-13.296140423879656	0.0920199541402879	0.9079800458597902	0.8185559964490848	0.10881938757076746	0.8911806124294187	0.22141133024156437
466	0.29302450247165235	0.676249821348323	2.4892462469037406	-13.296258660526824	0.09402919316225183	0.9059708068378283	0.8139563954661875	0.10644141064016166	0.8935585893600215	0.21552120243270295
467	0.2982473604546414	0.6819433825757302	2.4895325416236513	-13.296831249966644	0.09609623765168203	0.9039037623483999	0.80917433600993	0.10409387191049863	0.8959061280896805	0.2098037306201131
468	0.3035851499474538	0.6875681615266878	2.489811338847093	-13.29738884441353	0.09822630912176464	0.901773690878319	0.8041944870874499	0.10179424592668189	0.8982057540734923	0.2042777051513635
469	0.30904176804975797	0.6930919565253002	2.489875380115109	-13.297516926949562	0.1004232294464371	0.8995767705536486	0.7990046405230342	0.0995577480190245	0.9004422519811451	0.19895986390880177
470	0.31459912365362946	0.69850799105096	2.4897958863964194	-13.297357939512182	0.10268037516176165	0.8973196248383263	0.793610618464959	0.09738509057089773	0.9026149094292676	0.19384715748743847
471	0.32023973494401786	0.7038096747819325	2.489632557275532	-13.297031281270407	0.1049911228038007	0.8950088771962896	0.7880182430614998	0.09527698596567258	0.9047230140344886	0.18893653648228378
472	0.325946784433724	0.7089906123050158	2.4894339199564977	-13.296634006632342	0.10734884890861664	0.8926511510914763	0.7822333364609326	0.09323414658672016	0.9067658534134373	0.18422495148834792
473	0.3317041680092148	0.7140446114509129	2.489237770302526	-13.296241707324395	0.10974693001227184	0.8902530699878238	0.7762617208115329	0.0912572848174115	0.9087427151827423	0.179709353100641
474	0.33749653810224284	0.7189656912467925	2.48907168596815	-13.295909538655643	0.11217874265082853	0.88782125734927	0.770109218261577	0.08934711304111781	0.9106528869590325	0.17538669191417355
475	0.34330934112928213	0.7237480894779336	2.4889535953192947	-13.29567335735793	0.11463766336034945	0.8853623366397518	0.7637816509593396	0.08750434364120988	0.9124956563589371	0.1712539185239551
476	0.3491288493660983	0.7283862698507564	2.488892389187007	-13.295550945093359	0.11711706867689681	0.8828829313232073	0.7572848410530968	0.0857296890010589	0.914270310999085	0.16730798352499618
477	0.354942187448392	0.732874928749988	2.4888885654781916	-13.295543297675724	0.11961033513653299	0.880389664863574	0.7506246106911245	0.08402386150403593	0.9159761384961049	0.16354583751230695
478	0.360737353711326	0.7372090015831333	2.4889348992245512	-13.295635965168444	0.1221108392753204	0.8778891607247892	0.7438067820216983	0.08238757353351203	0.9176124264666259	0.15996443108089756
479	0.36650323660092216	0.7413836687058859	2.4890171327711617	-13.295800432261666	0.12461195762932145	0.8753880423707907	0.7368371771930938	0.08082153747285828	0.9191784625272768	0.1565607148257782
480	0.37222962640877216	0.7453943609225695	2.489114682490519	-13.295995531700378	0.12710706673459832	0.8728929332655163	0.7297216183535874	0.07932646570544583	0.9206735342946865	0.15333163934195934
481	0.377907222598238	0.7492367645561696	2.4892013596723856	-13.296168886064114	0.12958954312721377	0.8704104568729031	0.7224659276514537	0.07790307061464553	0.922096929385484	0.15027415522445062
482	0.38352763700533793	0.7529068260829997	2.4892461041088216	-13.296258374936986	0.13205276334323002	0.8679472366568889	0.7150759272349689	0.07655206458382854	0.9234479354162983	0.14738521306826247
483	0.3890858589491065	0.7564033036206381	2.4892189227919452	-13.296204012303232	0.1344931221733986	0.8655068778267195	0.7075562529760967	0.07527210547175532	0.9247278945283692	0.1446616710118006
484	0.3945644601843122	0.7597321203896169	2.489211130541084	-13.29618842780151	0.13689533523206954	0.8631046647680503	0.6999232844512957	0.07406044214741274	0.9259395578527098	0.14209339084740688
485	0.3999574427617484	0.7628946585792431	2.489220627722135	-13.29620742216361	0.13925267935860444	0.8607473206415188	0.692184591419817	0.07291544160978111	0.9270845583903393	0.13967530129867178
486	0.40526060689975635	0.7658924354511287	2.489238984270221	-13.296244135259785	0.14155931146114054	0.8584406885389871	0.6843469689046278	0.07183542502391024	0.9281645749762082	0.13740273318528412
487	0.41047055712940117	0.7687273200314372	2.4892589365879507	-13.296284039895244	0.1438093884478156	0.8561906115523167	0.6764172119286934	0.07081871355484969	0.9291812864452669	0.13527101732693225
488	0.41558468327973813	0.7714015161356111	2.489274798599105	-13.296315763917551	0.14599706722676686	0.8540029327733692	0.6684021155149814	0.06986362836764927	0.9301363716324657	0.1332754845433049
489	0.4206011398699976	0.7739175454279115	2.489282834158531	-13.296331835036405	0.1481165047061318	0.8518834952940064	0.6603084746864581	0.06896849062735869	0.9310315093727546	0.1314114656540908
490	0.4255188241915291	0.7762782305677954	2.4892815907556436	-13.29632934823063	0.15016185779404778	0.84983814220609	0.6521430844660904	0.0681316214990277	0.9318683785010841	0.1296742914789785
491	0.430337353357786	0.7784866784921276	2.4892721948413703	-13.296310556402087	0.15212728339865222	0.8478727166014816	0.6439127398768447	0.067351342147706	0.9326486578524044	0.12805929283765669
492	0.43505704059449124	0.7805462638792924	2.489258609536803	-13.296283385792947	0.15400693842808247	0.845993061572043	0.6356242359416884	0.06662597373844338	0.9333740262616658	0.12656180054981409
493	0.43967887103444214	0.7824606128384243	2.4892478559418025	-13.296261878602948	0.1557949797904762	0.8442050202096357	0.627284367683587	0.06595383743628946	0.9340461625638187	0.12517714543513914
494	0.4442050988362717	0.7842330264322964	2.4892421403559863	-13.296250447431316	0.15748639491548586	0.8425136050846206	0.6188991821836045	0.06533335453950967	0.9346666454605974	0.12390122659764745
495	0.44863927427842076	0.7858670788598127	2.4892437723140386	-13.296253711347418	0.15907703790820524	0.8409229620919025	0.6104736375114287	0.06476280698283284	0.9352371930172733	0.12273010512941541
496	0.45298583698277706	0.78736556118546	2.4892481066375316	-13.296262379994406	0.16056338530596292	0.8394366146941462	0.6020120188984995	0.06424084322966468	0.9357591567704405	0.12166050083854157
497	0.4572497692166057	0.7887310511434366	2.4892500181458583	-13.296266203011058	0.16194225866719208	0.8380577413329182	0.5935183210517804	0.06376622207359722	0.9362337779265071	0.12068945190958238
498	0.4614363288630643	0.7899662866594382	2.4892485154863824	-13.296263197692108	0.1632104795503259	0.8367895204497857	0.5849965386782354	0.06333770230822254	0.936662297691881	0.11981399652709437
499	0.46555104197773445	0.7910741559830977	2.489246732495716	-13.296259631710774	0.16436486951379767	0.8356351304863153	0.5764506664848272	0.06295404272713256	0.9370459572729702	0.11903117287563383
